# Supplementary material
Source: publisher figshare collection journal article supplement (https://acs.figshare.com/ndownloader/files/10200219)

# **Aerobic, Diselenide-Catalyzed Redox Dehydration: Amides and Peptides.**

Srirama Murthy Akondi, Pavankumar Gangireddy, Thomas C. Pickel and Lanny S. Liebeskind\*

## **Table of Contents:**

|                  |                                                                                             |
|------------------|---------------------------------------------------------------------------------------------|
| <b>PAGE S2:</b>  | General Information                                                                         |
| <b>PAGE S3:</b>  | Synthesis of Diselenic Acid <b>I</b> and Benzoisoselenazolones <b>4a</b> , <b>4b</b>        |
| <b>PAGE S4:</b>  | Formation of <i>p</i> -Toluic Benzylamide using Benzoisoselenazolones <b>4a</b> , <b>4b</b> |
| <b>PAGE S6:</b>  | Synthesis of Diselenides <b>6</b>                                                           |
| <b>PAGE S10:</b> | Screening of Diselenides <b>6</b>                                                           |
| <b>PAGE S11:</b> | Substrate Scope                                                                             |
| <b>PAGE S20:</b> | UV-VIS Studies                                                                              |
| <b>PAGE S21:</b> | X-ray Crystallography of Selenide <b>5h</b>                                                 |
| <b>PAGE S27:</b> | References                                                                                  |
| <b>PAGE S28:</b> | Scans of <sup>1</sup> H and <sup>13</sup> C NMR Spectra                                     |

## GENERAL INFORMATION:

All solvents were purchased from Fisher Scientific and dried using a JC Mayer solvent drying system. Unless otherwise noted, all commercially available reagents and substrates were used directly as received. Ultra-High Purity dry air was purchased from nexAir LLC. Thin layer chromatography was performed on Merck silica gel plates and visualized by UV light /phosphomolybdic acid /ninhydrin.  $^1\text{H}$  NMR and  $^{13}\text{C}$  NMR spectra were recorded on Bruker 600, Varian INOVA 600, INOVA 500 and INOVA 400 spectrometers. In the spectra, the residual protic solvent absorbances were treated as internal reference signals ( $\text{CDCl}_3$ :  $^1\text{H}$ -7.26 ppm and  $^{13}\text{C}$ - 77.16 ppm;  $\text{DMSO}-d_6$ :  $^1\text{H}$ -2.50 ppm and  $^{13}\text{C}$ -39.52). GC optimization studies were performed on a HP 6850 series GC system. UV-Vis studies were performed on a Cary<sup>®</sup> 50 UV-Vis Spectrophotometer. IR spectra were recorded on a Nicolet iS10 FT-IR spectrometer and the absorption peaks were reported in  $\text{cm}^{-1}$ . All racemization studies were performed on an Agilent 1100 series HPLC system with chiral AS-RH stationary phase. The purification of the products was performed on a Biotage flash chromatography system using silica gel flash cartridges. A Thomas capillary melting point apparatus was used to determine the melting points (uncorrected). High resolution mass spectra were obtained from the Emory University Mass Spec Facility Inc. X-ray crystal structure data was obtained from Dr. John Bacsá of the Emory University X-ray Crystallography Center. 8-(4-Chlorophenylsulfonamido)-4-(3-(pyridin-3-yl)propyl)octanoic acid was obtained from Novartis (as a gift to the Emory University Center for C-H Functionalization).

## Synthesis of 6,6'-Diselanediybis(3-nitrobenzoic acid) (**I**)<sup>1</sup>

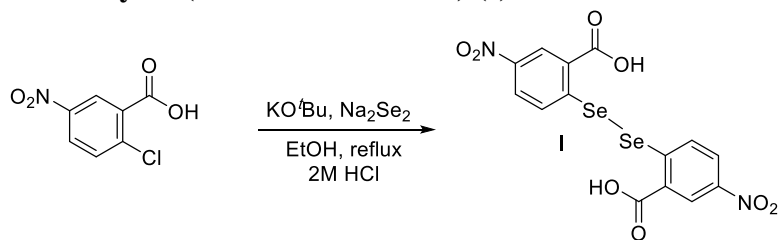

**Preparation of Na<sub>2</sub>Se<sub>2</sub>:**<sup>2</sup> Selenium powder (7.9 g, 100.0 mmol) was added to an aqueous solution (50 mL) of NaOH (4.0 g, 100.0 mmol) and hexadecyltrimethyl ammonium bromide (36 mg, 0.1 mmol). Then, to the above solution, NaBH<sub>4</sub> (475 mg, 12.5 mmol) with NaOH (400 mg, 10.0 mmol) in 10 mL of water (cooled in an ice bath) was added dropwise at room temperature under a nitrogen atmosphere with stirring. The mixture was stirred for 1 h at room temperature, then raised to 90 °C and stirred at that temperature for 1 h to complete the reaction. A brownish red aqueous solution of Na<sub>2</sub>Se<sub>2</sub> was obtained.

Then, to a stirred solution of 2-chloro-5-nitrobenzoic acid (19.15 g, 95.0 mmol) in EtOH (120 mL) was added a solution of KO<sup>t</sup>Bu (10.66 g, 95.0 mmol) in EtOH (60 mL) *via* addition funnel at room temperature. After that, the Na<sub>2</sub>Se<sub>2</sub> solution was added dropwise through an addition funnel and refluxed overnight. The reaction mixture was filtered while hot and concentrated to remove EtOH. The resulting slurry was acidified slowly with 2M aqueous HCl followed by filtration to give the pure acid **I** as yellow solid (19.2 g, 82% yield). Mp = > 280 °C. <sup>1</sup>H NMR (400 MHz, DMSO-*d*<sub>6</sub>) δ 8.64 (d, *J* = 2.7 Hz, 1H), 8.21 (dd, *J* = 8.8, 2.6 Hz, 1H), 7.86 (d, *J* = 8.9 Hz, 1H). <sup>13</sup>C NMR (101 MHz, DMSO-*d*<sub>6</sub>) δ 167.8, 146.6, 143.4, 131.7, 131.5, 127.1, 125.9. IR (neat, cm<sup>-1</sup>): 3305, 1597. HRMS (-APCL) Calcd. for C<sub>14</sub>H<sub>7</sub>N<sub>2</sub>O<sub>8</sub>Se<sub>2</sub> [M-H]<sup>-</sup>: 490.8538. Found: 490.8536.

## Synthesis of the Benzoisoselenazolones **4a** and **4b**:

### General Synthetic Route for **4a**, **4b**:

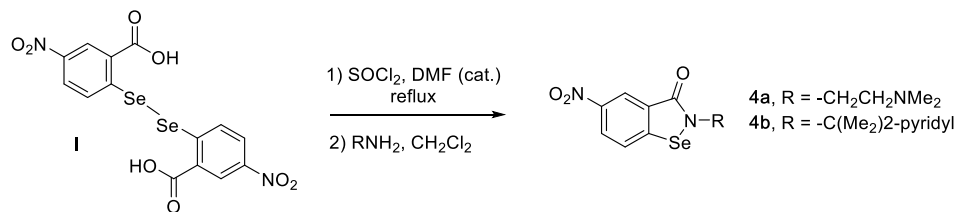

A solution of 6,6'-diselanediybis(3-nitrobenzoic acid) **I** (2.04 mmol) in thionyl chloride (15 mL) and catalytic amount of DMF (0.2 mL) was stirred at reflux (90 °C) for 3 h. The solvents were evaporated under vacuum and the crude product dissolved in dry CH<sub>2</sub>Cl<sub>2</sub> (10 mL) was added dropwise to a stirred solution of the corresponding amine (10.20 mmol) in dry CH<sub>2</sub>Cl<sub>2</sub> (5 mL) at room temperature. After completion of the reaction as monitored by silica gel TLC, the reaction mixture was neutralized with an aqueous ammonia solution, diluted with water and extracted into CH<sub>2</sub>Cl<sub>2</sub> (2 x 100 mL). The combined CH<sub>2</sub>Cl<sub>2</sub> layers were washed with aqueous sat'd. NaCl (100 mL), dried over anhydrous Na<sub>2</sub>SO<sub>4</sub> and concentrated under vacuum. The crude product was purified by SiO<sub>2</sub> flash column chromatography eluting with ethyl acetate/hexanes.

## 2-(2-(Dimethylamino)ethyl)-5-nitrobenzo[d][1,2]selenazol-3(2H)-one (**4a**)

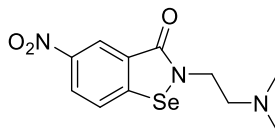

Prepared according to the general procedure from **I** (1.00 g, 2.04 mmol), thionyl chloride (15 mL), DMF (0.2 mL) and N,N-dimethylethylenediamine (0.67 mL, 6.12 mmol), **4a** was obtained as a pale yellow solid (1.04 g, 81% yield). Mp = 223 – 225 °C. <sup>1</sup>H NMR (399 MHz, chloroform-*d*) δ 8.86 (d, *J* = 0.8 Hz, 1H), 8.34 (dd, *J* = 8.6, 0.8 Hz, 1H), 7.73 (d, *J* = 8.6 Hz, 1H), 3.98 (t, *J* = 5.4 Hz, 2H), 2.68 (t, *J* = 5.4 Hz, 2H), 2.41 (s, 6H). <sup>13</sup>C NMR (151 MHz, chloroform-*d*) δ 166.3, 152.2, 146.6, 128.7, 125.2, 124.3, 123.3, 57.3, 44.3, 41.2. IR (neat, cm<sup>-1</sup>): 1615, 1596. HRMS (ESI) Calcd. for C<sub>11</sub>H<sub>14</sub>N<sub>3</sub>O<sub>3</sub>Se (M+H)<sup>+</sup>: 316.0195, Found: 316.0193.

## 5-Nitro-2-(2-(pyridin-2-yl)propan-2-yl)benzo[d][1,2]selenazol-3(2H)-one (**4b**)

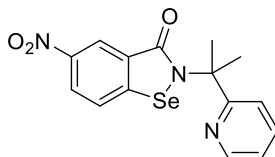

Prepared according to the general procedure from **I** (0.20 g, 0.41 mmol), thionyl chloride (3 mL), DMF (40 μL) and 2-(pyridin-2-yl)propan-2-amine<sup>3</sup> (0.17 g, 1.23 mmol), **4b** was obtained as a pale yellow solid (0.18 g, 62% yield). Mp = 198 – 200 °C. <sup>1</sup>H NMR (600 MHz, chloroform-*d*) δ 8.76 (d, *J* = 2.3 Hz, 1H), 8.60 (ddd, *J* = 4.8, 1.8, 0.9 Hz, 1H), 8.43 (dd, *J* = 8.7, 2.3 Hz, 1H), 7.81 (d, *J* = 8.7 Hz, 1H), 7.71 (dt, *J* = 7.8, 1.8 Hz, 1H), 7.45 (dd, *J* = 7.8, 0.9 Hz, 1H), 7.24 – 7.20 (m, 1H), 2.07 (s, 6H). <sup>13</sup>C NMR (151 MHz, chloroform-*d*) δ 165.0, 163.0, 149.0, 146.8, 145.3, 136.6, 130.2, 125.8, 124.3, 124.1, 122.3, 119.7, 64.2, 28.3. IR (neat, cm<sup>-1</sup>): 1590, 1510. HRMS (ESI) Calcd. for C<sub>15</sub>H<sub>14</sub>N<sub>3</sub>O<sub>3</sub>Se (M+H)<sup>+</sup>: 364.0195, Found: 364.0195.

## Formation of *p*-toluic benzylamide using benzoisoselenazolones (**4**) in the presence of CuI<sub>2</sub>(NMI)<sub>4</sub>:

A 12 mL test tube was charged with a 4 Å molecular sieves (50 mg), activated in a microwave oven for 3 min twice and kept under reduced pressure for 5 min. Then, *p*-toluic acid (50 mg, 0.37 mmol), benzoisoselenazolone **4** (0.0185 mmol), CuI<sub>2</sub>(NMI)<sub>4</sub><sup>4</sup> (24 mg, 0.037 mmol) and 1,3,5-*tert*-butylbenzene (90.5 mg, 0.37 mmol, GC internal standard) were added followed by dry acetonitrile (1.9 mL, 0.2M, moisture content <25 ppm). Triethylphosphite (95 μL, 0.55 mmol) and benzylamine (48 μL, 0.44 mmol) were added sequentially at 30 °C and the reaction mixture was stirred for 8 h at the same temperature under dry air atmosphere (balloon). The reaction was monitored periodically by GC.

Table S1

| time (h) | yield of <i>p</i> -toluic benzylamide (%) <sup>a</sup> |           |
|----------|--------------------------------------------------------|-----------|
|          | <b>4a</b>                                              | <b>4b</b> |
| 0        | 0                                                      | 0         |
| 2        | 61                                                     | 58        |
| 4        | 82                                                     | 81        |
| 6        | 89                                                     | 87        |
| 8        | 93                                                     | 92        |

*a*: GC corrected yield with internal standard (1,3,5-tri-*tert*-butylbenzene). Column: Agilent HP-5, length – 30 m, diameter 0.32 mm, film 0.25 μm. Method: Initial temp: 70 °C (0 min), ramp: 20 °C/min to maximum 300 °C (7 min wait time, total time 19.0 min).

**Formation of *p*-toluic benzylamide using benzoisoselenazolones (**4**) in the absence of CuI<sub>2</sub>(NMI)<sub>4</sub>:**

A 12 mL test tube was charged with a 4 Å molecular sieves (50 mg), activated in a microwave oven for 3 min twice and kept under reduced pressure for 5 min. Then, *p*-toluic acid (50 mg, 0.37 mmol), benzoisoselenazolone **4** (0.0185 mmol) and 1,3,5-tri-*tert*-butylbenzene (90.5 mg, 0.37 mmol, GC internal standard) were added followed by dry acetonitrile (1.9 mL, 0.2M, moisture content <25 ppm). Triethylphosphite (95 μL, 0.55 mmol) and benzylamine (48 μL, 0.44 mmol) were added sequentially at 30 °C and the reaction mixture was stirred for 8 h at the same temperature under dry air atmosphere (balloon). The reaction was monitored by GC.

Table S2

| time (h) | yield of <i>p</i> -toluic benzylamide (%) <sup>a</sup> |           |
|----------|--------------------------------------------------------|-----------|
|          | <b>4a</b>                                              | <b>4b</b> |
| 0        | 0                                                      | 0         |
| 2        | 64                                                     | 63        |
| 4        | 83                                                     | 80        |
| 6        | 89                                                     | 88        |
| 8        | 94                                                     | 92        |

*a*: GC corrected yield with internal standard (1,3,5-tri-*tert*-butylbenzene). Column: Agilent HP-5, length – 30 m, diameter 0.32 mm, film 0.25 μm. Method: Initial temp: 70 °C (0 min), ramp: 20 °C/min to maximum 300 °C (7 min wait time, total time 19.0 min).

## Synthesis of Diselenides:

### General Synthetic Route for **6b**, **6c**:

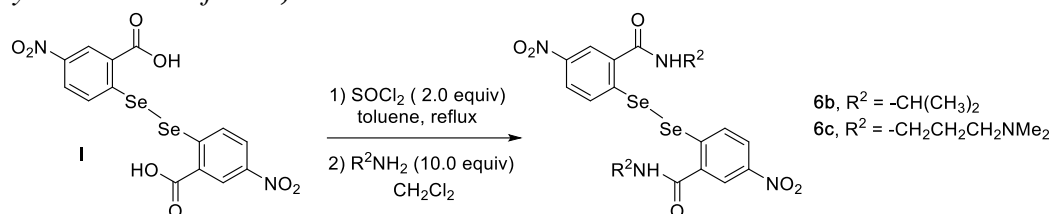

A solution of 6,6'-diselanediylbis(3-nitrobenzoic acid) **I** (0.551 mmol) and thionyl chloride (1.102 mmol) in toluene (5 mL) was refluxed under  $\text{N}_2$  until the diselenide had dissolved completely. Then, volatiles were evaporated under vacuum to give the crude product. The crude product in dry  $\text{CH}_2\text{Cl}_2$  (5 mL) was added dropwise over a period of 30 min to a stirred solution of the corresponding amine (5.51 mmol) in dry  $\text{CH}_2\text{Cl}_2$  (5 mL) at room temperature. After completion of the reaction as monitored by silica gel TLC (2-5% MeOH in  $\text{CH}_2\text{Cl}_2$ ), the reaction mixture was neutralized with aqueous ammonia solution, diluted with water and extracted into  $\text{CH}_2\text{Cl}_2$  (2 x 100 mL). The combined  $\text{CH}_2\text{Cl}_2$  layers were washed with aqueous sat'd. NaCl (100 mL), dried over anhydrous  $\text{Na}_2\text{SO}_4$  and concentrated under vacuum. The crude product was purified by  $\text{SiO}_2$  flash column chromatography eluting with 2-5% MeOH in  $\text{CH}_2\text{Cl}_2$ .

### 6,6'-Diselanediylbis(*N*-isopropyl-3-nitrobenzamide) (**6b**)

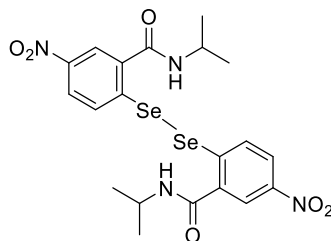

Prepared according to the general procedure from **I** (100 mg, 0.203 mmol), thionyl chloride (30 mL, 0.406 mmol) and isopropylamine (0.17 mL, 2.03 mmol). The crude product was purified by  $\text{SiO}_2$  flash column chromatography eluting with 2% MeOH in  $\text{CH}_2\text{Cl}_2$  to give **6b** as a pale yellow solid (60 mg, 52% yield).  $\text{Mp} = 278 - 280^\circ\text{C}$ .  $^1\text{H}$  NMR (400 MHz,  $\text{DMSO}-d_6$ )  $\delta$  9.02 (d,  $J = 7.6$  Hz, 2H), 8.73 (d,  $J = 2.5$  Hz, 2H), 8.20 (dd,  $J = 8.8, 2.4$  Hz, 2H), 7.87 (d,  $J = 8.9$  Hz, 2H), 4.20 – 4.04 (m, 2H), 1.21 (d,  $J = 6.6$  Hz, 12H).  $^{13}\text{C}$  NMR (100 MHz,  $\text{DMSO}-d_6$ )  $\delta$  165.3, 146.6, 142.5, 133.9, 131.8, 126.1, 123.1, 42.3, 22.5. IR (neat,  $\text{cm}^{-1}$ ): 3321, 1616, 1332. HRMS (ESI) Calcd. for  $\text{C}_{20}\text{H}_{21}\text{N}_4\text{O}_6\text{Se}_2$  ( $\text{M}-\text{H}^+$ ): 572.9797, Found: 572.9797.

### 6,6'-Diselanediylbis(*N*-(3-(dimethylamino)propyl)-3-nitrobenzamide) (**6c**)

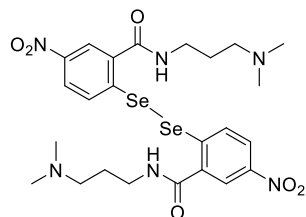

Prepared according to the general procedure from **I** (100 mg, 0.203 mmol), thionyl chloride (30 mL, 0.406 mmol) and 3-(dimethylamino)-1-propylamine (0.25 mL, 2.03 mmol). The crude product was

purified by SiO<sub>2</sub> flash column chromatography eluting with 5% MeOH in CH<sub>2</sub>Cl<sub>2</sub> to give **6c** as a pale yellow solid (58 mg, 43% yield). Mp = 206 – 208 °C. <sup>1</sup>H NMR (399 MHz, chloroform-*d*) δ 10.31 (brs, 2H), 8.40 – 8.36 (m, 2H), 8.02 (d, *J* = 1.3 Hz, 4H), 3.64 (q, *J* = 5.4 Hz, 4H), 2.63 (t, *J* = 5.4 Hz, 4H), 2.41 (s, 12H), 1.81 (p, *J* = 5.9 Hz, 4H). <sup>13</sup>C NMR (100 MHz, chloroform-*d*) δ 165.6, 146.3, 143.3, 133.0, 132.2, 125.0, 121.5, 60.1, 45.2, 42.1, 23.7. IR (neat, cm<sup>-1</sup>): 3314, 1615. HRMS (ESI) Calcd. for C<sub>24</sub>H<sub>31</sub>N<sub>6</sub>O<sub>6</sub>Se<sub>2</sub> (M-H)<sup>+</sup>: 659.0641, Found: 659.0641.

**Synthesis of *N*<sup>I</sup>,*N*<sup>I'</sup>'-((diselanediylbis(5-nitro-2,1-phenylene))bis(methylene))bis(*N*<sup>I</sup>,*N*<sup>2</sup>,*N*<sup>2</sup>-trimethylethane-1,2-diamine) (**6d**)**

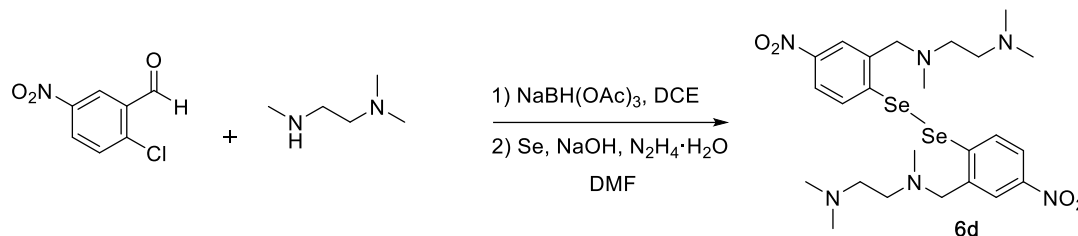

To a mixture of N,N'-trimethylethylenediamine (0.14 mL, 1.06 mmol) and 2-chloro-5-nitrobenzaldehyde (200 mg, 1.06 mmol) in 1,2-dichloroethane (4 mL) was added sodium triacetoxyborohydride (314 mg, 1.48 mmol) portion-wise. The mixture was stirred at rt under a N<sub>2</sub> atmosphere for 16 h. The reaction mixture was quenched with 1 N NaOH, and the product was extracted into ethyl acetate. The ethyl acetate extract was washed with brine, dried over Na<sub>2</sub>SO<sub>4</sub> and concentrated to give the crude halo amine.

To a rapidly stirred solution of sodium hydroxide (64 mg, 1.59 mmol) and selenium powder (82 mg, 1.06 mmol) in dimethylformamide (5 mL) was added 100% hydrazine hydrate (81 μL, 1.06 mmol) dropwise at room temperature. The mixture was allowed to stir for an additional two hours. The crude halo amine (287 mg, 1.06 mmol) was added dropwise to the reaction mixture and refluxed for 4 hours. The reaction was quenched by adding water and the product was extracted into ethyl acetate. The ethyl acetate extract was washed with brine, dried over Na<sub>2</sub>SO<sub>4</sub> and concentrated. The crude product was purified by SiO<sub>2</sub> flash column chromatography eluting with 5% aqueous NH<sub>4</sub>OH in CH<sub>3</sub>CN to obtain compound **6d** as a yellow oil (204 mg, 61% yield). <sup>1</sup>H NMR (400 MHz, chloroform-*d*) δ 8.01 (d, *J* = 2.5 Hz, 2H), 7.93 (dd, *J* = 8.7, 2.5 Hz, 2H), 7.84 (d, *J* = 8.7 Hz, 2H), 3.77 (s, 4H), 2.64 (t, *J* = 7.3 Hz, 4H), 2.52 (t, *J* = 7.3 Hz, 4H), 2.30 (s, 6H), 2.24 (s, 12H). <sup>13</sup>C NMR (75 MHz, chloroform-*d*) δ 146.3, 143.4, 140.4, 131.7, 122.9, 122.8, 63.0, 56.9, 54.4, 45.8, 41.1. IR (neat, cm<sup>-1</sup>): 1513, 1336. HRMS (ESI) Calcd. for C<sub>24</sub>H<sub>37</sub>N<sub>6</sub>O<sub>4</sub>Se<sub>2</sub> (M+H)<sup>+</sup>: 633.1201, Found: 633.1208.

**2,2'-Diselanediylbis(*N*-(2-(dimethylamino)ethyl)-*N*-methylnicotinamide) (**6e**)**

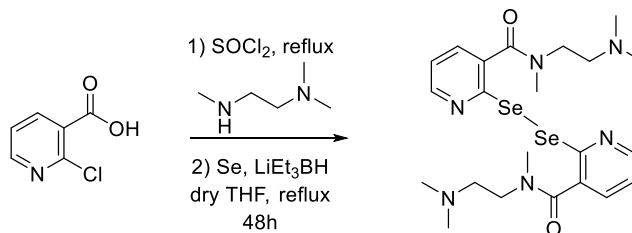

Into a flame-dried round-bottomed flask, 2-chloronicotinic acid (1.0 g, 6.35 mmol) and  $\text{SOCl}_2$  (4.6 mL, 63.5 mmol) were charged under an argon atmosphere and the solution was refluxed overnight. The excess  $\text{SOCl}_2$  was removed under reduced pressure to provide the crude acid chloride. This acid chloride in dry THF (3.0 mL) was added to a mixture of  $\text{N,N,N'}$ -trimethylethylenediamine (0.697 mL, 6.82 mmol) and trimethylamine (0.69 g, 6.82 mmol) in THF (10 mL) at 0 °C under an argon atmosphere. The reaction mixture was stirred at room temperature until the acid chloride was completely consumed (a small portion of the reaction mixture was quenched with methanol and monitored by silica gel TLC). After completion of the reaction, water (5 mL) was added to the reaction mixture, which was extracted with  $\text{CH}_2\text{Cl}_2$  (2 x 10 mL). The combined  $\text{CH}_2\text{Cl}_2$  layer was washed with aqueous sat'd  $\text{NaHCO}_3$  (5 mL) and brine solution. The  $\text{CH}_2\text{Cl}_2$  layer was dried over anhydrous  $\text{Na}_2\text{SO}_4$ , filtered, and concentrated under reduced pressure to provide the crude amide that was taken directly into the next reaction. In a dry, round-bottomed flask (100 mL), selenium (0.602 g, 7.62 mmol) and dry THF (10 mL) were charged under an argon atmosphere, then a 1M solution of lithium triethylborohydride in dry THF (7.62 mL, 7.62 mmol) was added at room temperature. The reaction mixture was heated to 90 °C and stirred for 1 h under an argon atmosphere. The reaction mixture was cooled to 50 °C and the crude amide in dry THF (5 mL) was added. Then, the reaction mixture was again heated to 90 °C and stirred for 16 h. After cooling to the room temperature, water (20 mL) was added to precipitate the unreacted selenium metal, which was filtered through a small plug of Celite and washed with  $\text{CH}_2\text{Cl}_2$  (30 mL). Two layers were separated, and the  $\text{CH}_2\text{Cl}_2$  layer was washed with aqueous sat'd.  $\text{NaHCO}_3$  (15 mL) solution. The organic layer was dried over anhydrous  $\text{Na}_2\text{SO}_4$ , filtered, and concentrated under vacuum to provide the crude product. Purification of the crude product by flash column chromatography using  $\text{SiO}_2$  and 5% MeOH in  $\text{CH}_2\text{Cl}_2$  provided **6e** as a creamy white solid (1.7 g, 47% yield). Mp = 174 – 176 °C.  $^1\text{H}$  NMR (400 MHz, chloroform-*d*)  $\delta$  8.39 (dd,  $J$  = 4.8, 1.8 Hz, 2H), 7.45 (d,  $J$  = 7.5 Hz, 2H), 7.09 (dd,  $J$  = 7.5, 4.8 Hz, 2H), 3.72 – 1.99 (m, 26H).  $^{13}\text{C}$  NMR (151 MHz, chloroform-*d*)  $\delta$  168.6, 151.7, 150.5, 134.2, 133.1, 121.0, 45.7 (only one aliphatic peak was resolved). IR (neat,  $\text{cm}^{-1}$ ): 1605, 1382. HRMS (ESI) Calcd. for  $\text{C}_{22}\text{H}_{33}\text{N}_6\text{O}_2\text{Se}_2$  ( $\text{M}+\text{H}$ ) $^+$ : 573.0995, Found: 573.0994.

### Synthesis of 6,6'-diselanediybis(3-nitro-*N*-(2-(pyridin-2-yl)propan-2-yl)benzamide) (**6f**)

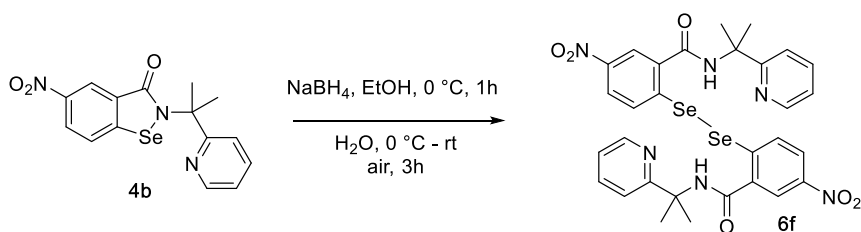

To a solution of **4b** (30 mg, 0.083 mmol) in ethanol (1 mL) was added sodium borohydride (3 mg, 0.083 mmol) at 0 °C. After 1 h water (0.2 mL) was added. The reaction mixture was allowed to warm to room temperature. After stirring for 3 h in air, the product was extracted with dichloromethane (10 mL) three times. The combined organic layers were washed with brine (10 mL), dried over anhydrous sodium sulfate, and concentrated under reduced pressure. The resulting compound was recrystallized from ethyl acetate to provide **6f** (21 mg, 71% yield) as a yellow solid. Mp = 214 – 216 °C.  $^1\text{H}$  NMR (600 MHz, chloroform-*d*)  $\delta$  9.47 (s, 2H), 8.60 (ddd,  $J$  = 4.9, 1.8 Hz, 2H), 8.58 (d,  $J$  = 2.3 Hz, 2H), 8.09 (dd,  $J$  = 8.8, 2.3 Hz, 2H), 8.05 (d,  $J$  = 8.8 Hz, 2H), 7.82 (td,  $J$  = 7.7, 1.8 Hz, 2H), 7.50 (dd,  $J$  = 8.1, 1.2 Hz, 2H), 7.30 (ddd,  $J$  = 7.4, 4.8, 1.2 Hz, 2H), 1.94 (s, 12H).  $^{13}\text{C}$  NMR (151 MHz, chloroform-*d*)  $\delta$  165.4, 163.6, 147.6, 146.5, 142.5, 137.7, 135.2, 132.1, 125.3, 122.4, 121.8, 119.5, 57.3, 27.3. IR (neat,  $\text{cm}^{-1}$ ): 3314, 1649, 1342. HRMS (ESI) Calcd. for  $\text{C}_{18}\text{H}_{33}\text{N}_8\text{O}_{13}\text{Se}_2$  ( $\text{M}+\text{H}$ ) $^+$ : 729.0492, Found: 729.0484.



*General Synthetic Route for 6g, 6h:*

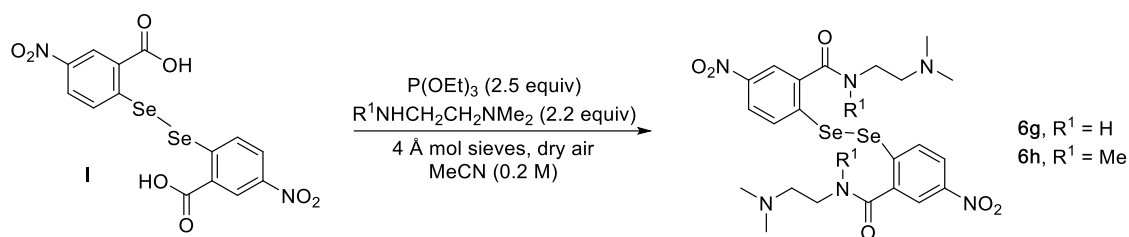

An oven dried round-bottomed flask was charged with a 4 Å molecular sieves (275 mg) that were previously activated in a microwave oven for 3 min and dried under reduced pressure for 5 min. Then, 6,6'-diselanediyldis(3-nitrobenzoic acid) (0.551 mmol) was added followed by dry acetonitrile (2.75 mL, 0.2M). Triethylphosphite (1.377 mmol) was added to the reaction mixture followed after 5 min by the corresponding amine (1.212 mmol). The reaction mixture was stirred for 24 h at the room temperature under a dry air atmosphere (balloon). The reaction mixture was concentrated and purified by flash chromatography (SiO<sub>2</sub>, eluted with MeOH in CH<sub>2</sub>Cl<sub>2</sub>) to obtain the pure compound.

**6,6'-Diselanediyldis(*N*-(2-(dimethylamino)ethyl)-3-nitrobenzamide) (6g)**

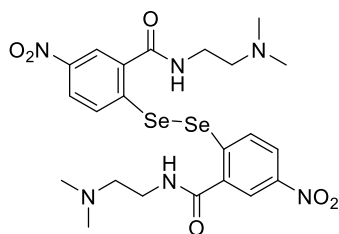

A mixture of **I** (1.0 g, 2.04 mmol) and 4 Å molecular sieves (1.0 g) in dry CH<sub>3</sub>CN (10 mL, 0.2M) was treated with P(OEt)<sub>3</sub> (0.88 mL, 5.10 mmol), followed by N,N-dimethylethylenediamine (0.50 mL, 4.50 mmol) according to the general procedure. The reaction was stirred for 28 h under dry air and purified by flash column chromatography using SiO<sub>2</sub> and 5% MeOH in CH<sub>2</sub>Cl<sub>2</sub> to give **6g** as a pale yellow solid (920 mg, 72% yield). Mp = 230 – 232 °C. <sup>1</sup>H NMR (600 MHz, chloroform-*d*) δ 8.35 (d, *J* = 2.3 Hz, 2H), 8.02 (dd, *J* = 8.8, 2.3 Hz, 2H), 7.96 (d, *J* = 8.9 Hz, 2H), 7.12 (s, 2H), 3.53 (q, *J* = 5.4 Hz, 4H), 2.54 (t, *J* = 5.9 Hz, 4H), 2.26 (s, 12H). <sup>13</sup>C NMR (151 MHz, chloroform-*d*) δ 166.2, 146.4, 142.9, 133.3, 132.2, 125.5, 121.7, 57.3, 45.1, 37.6. IR (neat, cm<sup>-1</sup>): 3305, 1616, 1597. HRMS (ESI) Calcd. for C<sub>22</sub>H<sub>29</sub>N<sub>6</sub>O<sub>6</sub>Se<sub>2</sub> (M+H)<sup>+</sup>: 633.0473, Found: 633.0476.

**6,6'-Diselanediyldis(*N*-(2-(dimethylamino)ethyl)-*N*-methyl-3-nitrobenzamide) (6h)**

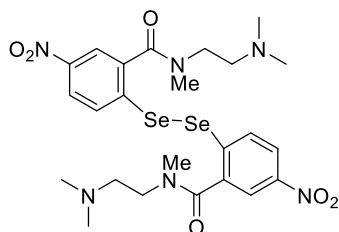

A mixture of **I** (1.0 g, 2.04 mmol) and 4 Å molecular sieves (1.0 g) in dry CH<sub>3</sub>CN (10 mL, 0.2M) was treated with P(OEt)<sub>3</sub> (0.88 mL, 5.10 mmol), followed by N,N,N'-trimethylethylenediamine (0.58 mL,

4.50 mmol) according to the general procedure. The reaction was stirred for 24 h under dry air and purified by flash column chromatography using SiO<sub>2</sub> and 5% MeOH in CH<sub>2</sub>Cl<sub>2</sub> to give **6g** as a pale yellow semi-solid (980 mg, 73% yield). <sup>1</sup>H NMR (400 MHz, DMSO-*d*<sub>6</sub>, 85 °C) δ 8.12 (dd, *J* = 8.6, 2.5 Hz, 2H), 8.09 (d, *J* = 2.4 Hz, 2H), 8.01 (d, *J* = 8.6 Hz, 2H), 3.41 (t, *J* = 6.5 Hz, 4H), 2.96 (s, 6H), 2.45 (t, *J* = 6.5 Hz, 4H), 2.09 (s, 12H). <sup>13</sup>C NMR (126 MHz, DMSO-*d*<sub>6</sub>, 85 °C) δ 167.6, 147.1, 139.0, 138.2, 133.4, 124.8, 122.0, 56.7, 45.6 (only two aliphatic peaks were resolved). IR (neat, cm<sup>-1</sup>): 1614, 1515. HRMS (ESI) Calcd. for C<sub>24</sub>H<sub>32</sub>N<sub>6</sub>O<sub>6</sub>Se<sub>2</sub> (M+H)<sup>+</sup>: 661.0786, Found: 661.0789.

### Screening of Diselenides:

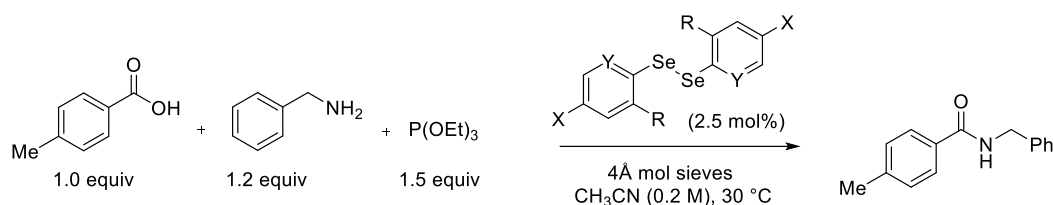

| #         | R                                                                   | X               | Y  |
|-----------|---------------------------------------------------------------------|-----------------|----|
| <b>6a</b> | H                                                                   | H               | CH |
| <b>6b</b> | CONH/Pr                                                             | NO <sub>2</sub> | CH |
| <b>6c</b> | CONH(CH <sub>2</sub> ) <sub>3</sub> NMe <sub>2</sub>                | NO <sub>2</sub> | CH |
| <b>6d</b> | CH <sub>2</sub> NMe(CH <sub>2</sub> ) <sub>2</sub> NMe <sub>2</sub> | NO <sub>2</sub> | CH |
| <b>6e</b> | CONMe(CH <sub>2</sub> ) <sub>2</sub> NMe <sub>2</sub>               | H               | N  |
| <b>6f</b> | CONHC(Me <sub>2</sub> ) <sub>2</sub> -pyridyl                       | NO <sub>2</sub> | CH |
| <b>6g</b> | CONH(CH <sub>2</sub> ) <sub>2</sub> NMe <sub>2</sub>                | NO <sub>2</sub> | CH |
| <b>6h</b> | CONMe(CH <sub>2</sub> ) <sub>2</sub> NMe <sub>2</sub>               | NO <sub>2</sub> | CH |

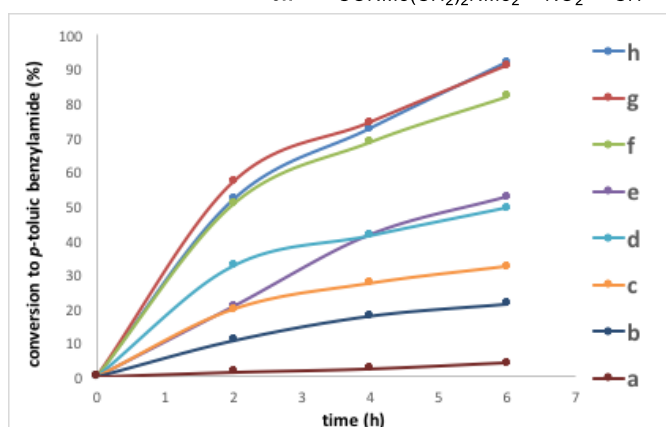

### Procedure:

A 12 mL test tube was charged with a 4 Å molecular sieves (50 mg), activated in a microwave oven for 3 min twice and kept under reduced pressure for 5 min. Then, *p*-toluic acid (50 mg, 0.37 mmol), diselenide **6** (0.0092 mmol), and 1,3,5-tri-*tert*-butylbenzene (90.5 mg, 0.37 mmol, GC internal standard) were added and followed by dry acetonitrile (1.9 mL, 0.2M, moisture content <25ppm). Triethylphosphite (95 µL, 0.55 mmol) and benzylamine (48 µL, 0.44 mmol) were added sequentially at 30 °C and the reaction mixture was stirred for 8 h at the same temperature under dry air atmosphere (balloon). The reaction was monitored by GC. The conversion rate curves for the different diselenides are presented in the manuscript.

Table S3

| entry | diselenide <b>6</b> | time<br>(h) | yield<br>(%) <sup>a</sup> |
|-------|---------------------|-------------|---------------------------|
| 1     | <b>6a</b>           | 6           | 4                         |
| 2     | <b>6b</b>           | 6           | 21                        |
| 3     | <b>6c</b>           | 6           | 32                        |
| 4     | <b>6d</b>           | 6           | 49                        |
| 5     | <b>6e</b>           | 6           | 52                        |
| 6     | <b>6f</b>           | 6           | 82                        |
| 7     | <b>6g</b>           | 6           | 91                        |
| 8     | <b>6h</b>           | 6           | 92, 90 <sup>b</sup>       |

*a*: GC corrected yield with internal standard (1,3,5-tri-*tert*-butylbenzene). Column: Agilent HP-5, length – 30 m, diameter 0.32 mm, film 0.25  $\mu$ m. Method: Initial temp: 70 °C (0 min), ramp: 20 °C/min to maximum 300 °C (7 min wait time, total time 19.0 min). *b*: isolated yield.

## Substrate Scope:

### General Experimental Procedure for Amide Bond Formation:

A 12 mL test tube was charged with 4 Å molecular sieves (100 mg) previously activated in a microwave oven for 3 min and dried under reduced pressure for 5 min. Then the carboxylic acid (0.367 mmol) and diselenide **6g** or **6h** (0.009 mmol) were added followed by dry acetonitrile or DMF (1.8 mL, 0.2M, moisture content <25 ppm). Triethyl phosphite (0.550 mmol) and amine (0.403 – 0.440 mmol) or amine·HCl with DIPEA (0.385 – 0.422 mmol) were added sequentially. The reaction mixture was stirred for 6 - 24 h at 30 - 50 °C under a dry air atmosphere (balloon). Upon complete conversion of carboxylic acid as monitored by TLC (EtOAc in hexanes or MeOH in CH<sub>2</sub>Cl<sub>2</sub>), the reaction mixture was filtered and the molecular sieves thoroughly washed with CH<sub>2</sub>Cl<sub>2</sub>. The combined filtrate was concentrated under reduced pressure and the crude product was purified by flash column chromatography (silica gel with ethyl acetate in hexanes) to obtain the pure amide product.

### Methyl ((benzyloxy)carbonyl)-*L*-phenylalanyl-*D*-tryptophanate (entry 1)<sup>5</sup>

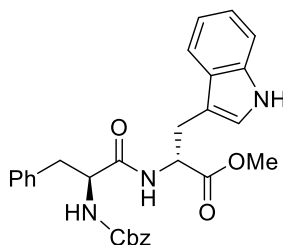

A mixture of *L*-Cbz-Phe-OH (1.0 g, 3.34 mmol), diselenide **6g** (60 mg, 0.084 mmol) and 4 Å molecular sieves (1.0 g) in dry CH<sub>3</sub>CN (17 mL, 0.2M) was treated with P(OEt)<sub>3</sub> (0.86 mL, 5.01 mmol) followed by *D*-tryptophan methyl ester hydrochloride (1.02 g, 4.008 mmol) and DIPEA (0.66 mL, 3.84 mmol) according to the general procedure. The coupling reaction was stirred for 16 h under dry air at 30 °C and purified by flash column chromatography using SiO<sub>2</sub> and 30% EtOAc in hexane to give the pure

amide **1** as a white solid (1.60 g, 96% yield). Mp = 129 – 130 °C. <sup>1</sup>H NMR (399 MHz, chloroform-*d*) δ 8.01 (s, 1H), 7.41 – 7.34 (m, 1H), 7.34 – 7.18 (m, 9H), 7.16 – 7.07 (m, 3H), 7.03 (t, *J* = 7.3 Hz, 1H), 6.78 (s, 1H), 6.37 (d, *J* = 7.7 Hz, 1H), 5.24 (d, *J* = 8.4 Hz, 1H), 5.03 – 4.93 (m, 2H), 4.86 – 4.80 (m, 1H), 4.42 (d, *J* = 7.9 Hz, 1H), 3.61 (s, 3H), 3.21 (d, *J* = 5.5 Hz, 2H), 3.00 (d, *J* = 6.2 Hz, 2H). <sup>13</sup>C NMR (151 MHz, chloroform-*d*) δ 171.7, 170.3, 155.8, 136.3, 136.0, 129.4, 128.6, 128.5, 128.2, 128.0, 127.4, 127.0, 122.9, 122.3, 119.7, 118.4, 111.3, 109.6, 66.9, 56.0, 52.9, 52.4, 38.4, 27.6. IR (neat, cm<sup>-1</sup>): 3353, 3267, 1616. HRMS (ESI) Calcd for C<sub>29</sub>H<sub>29</sub>N<sub>3</sub>O<sub>5</sub>Na [M+Na]<sup>+</sup>: 522.1999. Found: 522.1999.

**Methyl *N*<sup>2</sup>-(((9*H*-fluoren-9-yl)methoxy)carbonyl)-*N*<sup>6</sup>-(*tert*-butoxycarbonyl)-*L*-lysyl-*L*-threoninate (entry 2)**

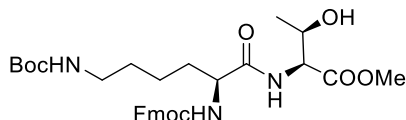

A mixture of N<sub>α</sub>-Fmoc-N<sub>ε</sub>-*t*-Boc-*L*-lysine (1.0 g, 2.134 mmol), diselenide **6g** (33.6 mg, 0.053 mmol) and 4 Å molecular sieves (1.0 g) in dry CH<sub>3</sub>CN (10.7 mL, 0.2M) was treated with P(OEt)<sub>3</sub> (0.55 mL, 3.20 mmol), followed by H-Thr-OMe·HCl (434 mg, 2.56 mmol) and DIPEA (0.41 mL, 2.348 mmol) according to the general procedure. The coupling reaction was stirred for 16 h under dry air at 30 °C and purified by flash column chromatography using SiO<sub>2</sub> and 55% EtOAc in hexane to give the pure amide **2** as a white solid (1.01 g, 81% yield). Mp = 75 – 77 °C. <sup>1</sup>H NMR (400 MHz, chloroform-*d*) δ 7.73 (d, *J* = 7.5 Hz, 2H), 7.56 (d, *J* = 7.2 Hz, 2H), 7.36 (t, *J* = 7.5 Hz, 2H), 7.30 – 7.23 (m, 2H), 7.11 (brs, 1H), 5.79 (s, 1H), 4.81 (s, 1H), 4.57 (dd, *J* = 8.8, 2.0 Hz, 1H), 4.37 – 4.24 (m, 4H), 4.16 (t, *J* = 7 Hz, 1H), 3.72 (s, 3H), 3.19 – 2.93 (m, 3H), 1.95 – 1.63 (m, 3H), 1.58 – 1.32 (m, 12H), 1.17 (d, *J* = 6.7 Hz, 3H). <sup>13</sup>C NMR (101 MHz, chloroform-*d*) δ 172.5, 171.3, 156.2, 143.8, 143.6, 141.2, 127.7, 127.0, 125.1, 119.9, 79.2, 67.9, 67.1, 57.5, 54.6, 52.6, 47.0, 39.9, 32.2, 29.4, 28.4, 22.2, 20.0. IR (neat, cm<sup>-1</sup>): 3308 (broad), 1684. HRMS (ESI) Calcd for C<sub>31</sub>H<sub>42</sub>N<sub>3</sub>O<sub>8</sub> [M+H]<sup>+</sup>: 584.2966. Found: 584.2975.

**5-(((3*aS*,4*S*,6*aR*)-2-Oxohexahydro-1*H*-thieno[3,4-*d*]imidazol-4-yl)-*N*-(2-phenylpropan-2-yl)pentanamide (entry 3)**

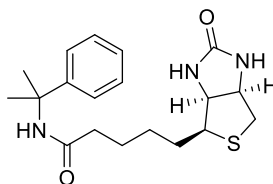

A mixture of (+)-biotin (50 mg, 0.205 mmol), diselenide **6h** (3 mg, 0.0051 mmol) and 4 Å molecular sieves (100 mg) in dry DMF (1.0 mL, 0.2M) was treated with P(OEt)<sub>3</sub> (53 μL, 0.307 mmol), followed by 2-phenylpropan-2-amine (32 μL, 0.225 mmol) according to the general procedure. The coupling reaction was stirred for 18 h under dry air at 30 °C and purified by flash column chromatography using SiO<sub>2</sub> and 10% MeOH in CH<sub>2</sub>Cl<sub>2</sub> to give the pure amide **4** as a yellow crystalline solid (64 mg, 87% yield). Mp = 120 – 122 °C. <sup>1</sup>H NMR (600 MHz, chloroform-*d*) δ 7.37 (d, *J* = 7.5 Hz, 2H), 7.31 (t, *J* = 7.6 Hz, 2H), 7.21 (t, *J* = 7.3 Hz, 1H), 5.99 (s, 1H), 5.94 (s, 1H), 5.21 (s, 1H), 4.46 (dd, *J* = 7.7, 5.0 Hz, 1H), 4.25 (dd, *J* = 8.1, 4.7 Hz, 1H), 3.12 (td, *J* = 7.4, 4.6 Hz, 1H), 2.86 (dd, *J* = 12.8, 5.0 Hz, 1H), 2.66 (d, *J* = 12.8 Hz, 1H), 2.18 (t, *J* = 7.4 Hz, 2H), 1.81 – 1.58 (m, 10H), 1.48 – 1.35 (m, 2H). <sup>13</sup>C NMR (151 MHz, chloroform-*d*) δ 172.0, 163.5, 147.0, 128.3, 126.6, 124.8, 61.8, 60.1, 55.7, 55.4,

40.5, 36.7, 29.2, 29.1, 28.2, 28.1, 25.6. IR (neat,  $\text{cm}^{-1}$ ): 3207, 3061, 1696, 1644. HRMS (ESI) Calcd. for  $\text{C}_{19}\text{H}_{28}\text{N}_3\text{O}_2\text{S}$  ( $\text{M}+\text{H}$ ) $^{+}$ : 362.1902, Found: 362.1892.

**Dibenzyl (S)-5-(2-((*tert*-butoxycarbonyl)amino)-3-(2-fluorophenyl)propanamido)isophthalate (entry 4)<sup>6</sup>**

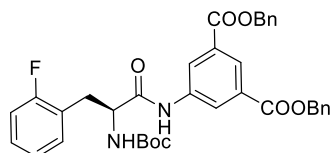

A mixture of N-Boc-2-fluoro-*L*-phenylalanine (50 mg, 0.176 mmol), diselenide **6h** (3 mg, 0.0044 mmol) and 4 Å molecular sieves (100 mg) in dry  $\text{CH}_3\text{CN}$  (0.9 mL, 0.2M) was treated with  $\text{P}(\text{OEt})_3$  (42  $\mu\text{L}$ , 0.265 mmol), followed by dibenzyl 5-aminoisophthalate (70 mg, 0.194 mmol) according to the general procedure. The coupling reaction was stirred for 16 h under dry air at 30 °C and purified by flash column chromatography using  $\text{SiO}_2$  and 30% EtOAc in hexane to give the pure amide **5** as a white solid (76 mg, 69% yield). Mp = 176 – 178 °C.  $^1\text{H}$  NMR (400 MHz,  $\text{DMSO}-d_6$ )  $\delta$  10.46 (s, 1H), 8.49 (s, 2H), 8.21 (s, 1H), 7.48 (dd,  $J$  = 8.0, 1.8 Hz, 4H), 7.45 – 7.34 (m, 7H), 7.32 – 7.27 (m, 1H), 7.25 – 7.19 (m, 2H), 7.15 – 7.04 (m, 2H), 5.38 (s, 4H), 4.35 (q,  $J$  = 8.0 Hz, 1H), 3.06 (dd,  $J$  = 13.9, 6.1 Hz, 2H), 2.90 (dd,  $J$  = 13.9, 9.2 Hz, 2H), 1.31 (s, 9H).  $^{13}\text{C}$  NMR (151 MHz,  $\text{DMSO}-d_6$ )  $\delta$  170.9, 164.6, 161.5 (d,  $J$  = 245.0 Hz), 155.1, 139.7, 135.8, 131.6, 130.6, 128.6, 128.3, 128.2, 124.4, 124.2, 124.1, 115.0 (d,  $J$  = 21.5 Hz), 78.3, 66.7, 55.0, 30.8, 28.1. IR (neat,  $\text{cm}^{-1}$ ): 3315 (broad), 1718, 1667, 1223, 1163.

**(S)-N-(1-(Isopentylamino)-1-oxo-3-phenylpropan-2-yl)pyrazine-2-carboxamide (entry 5)<sup>7</sup>**

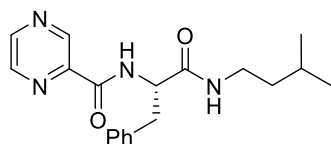

A mixture of (pyrazine-2-carbonyl)-*L*-phenylalanine<sup>8-9</sup> (50 mg, 0.184 mmol), diselenide **6h** (3 mg, 0.0046 mmol) and 4 Å molecular sieves (100 mg) in dry  $\text{CH}_3\text{CN}$  (0.9 mL, 0.2M) was treated with  $\text{P}(\text{OEt})_3$  (47  $\mu\text{L}$ , 0.276 mmol), followed by isopentylamine (24  $\mu\text{L}$ , 0.202 mmol) according to the general procedure. The coupling reaction was stirred for 16 h under dry air at 50 °C and purified by flash column chromatography using  $\text{SiO}_2$  and 40% EtOAc in hexane to give the pure amide **6** as a white solid (52 mg, 78% yield). Mp = 99 - 100 °C.  $^1\text{H}$  NMR (600 MHz,  $\text{chloroform}-d$ )  $\delta$  9.38 (d,  $J$  = 1.4 Hz, 1H), 8.78 (d,  $J$  = 2.5 Hz, 1H), 8.57 (dd,  $J$  = 2.4, 1.5 Hz, 1H), 8.44 (d,  $J$  = 8.3 Hz, 1H), 7.36 – 7.24 (m, 5H), 5.57 (s, 1H), 4.76 (td,  $J$  = 8.4, 6.1 Hz, 1H), 3.32 – 3.12 (m, 4H), 1.48 -1.40 (m, 1H), 1.28 – 1.19 (m, 2H), 0.86 (d,  $J$  = 2.7 Hz, 3H), 0.85 (d,  $J$  = 2.7 Hz, 3H).  $^{13}\text{C}$  NMR (151 MHz,  $\text{chloroform}-d$ )  $\delta$  169.9, 162.9, 147.5, 144.3, 144.0, 142.8, 136.6, 129.3, 128.8, 127.1, 55.1, 38.7, 38.1, 37.9, 25.6, 22.3. IR (neat,  $\text{cm}^{-1}$ ): 3328, 3315, 1659, 1646. HRMS (ESI) Calcd. for  $\text{C}_{19}\text{H}_{24}\text{N}_4\text{O}_2\text{Na}$  ( $\text{M}+\text{Na}$ ) $^{+}$ : 363.1797, Found: 363.1786.

**(S)-2-((1-((2*R*,4*S*,5*R*)-4-Hydroxy-5-(hydroxymethyl)tetrahydrofuran-2-yl)-2-oxo-1,2-dihydropyrimidin-4-yl)amino)-2-oxo-1-phenylethyl acetate (entry 6)**

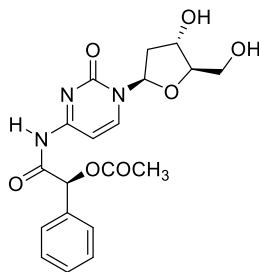

A mixture of (*S*)-(+)-*O*-acetylmandelic acid (50 mg, 0.257 mmol), diselenide **6h** (3 mg, 0.0045 mmol) and 4 Å molecular sieves (100 mg) in dry DMF (1.3 mL, 0.2M) was treated with P(OEt)<sub>3</sub> (66 µL, 0.385 mmol), followed by 2'-deoxycytidine monohydrochloride (75 mg, 0.283 mmol) and DIPEA (48 µL, 0.270 mmol) according to the general procedure. The coupling reaction was stirred for 16 h under dry air at 55 °C and purified by flash column chromatography using SiO<sub>2</sub> and 4% MeOH in CH<sub>2</sub>Cl<sub>2</sub> to give the pure amide **7** as a white solid (72 mg, 69% yield). Mp = 190 – 192 °C. <sup>1</sup>H NMR (600 MHz, DMSO-*d*<sub>6</sub>) δ 11.37 (s, 1H), 8.34 (d, *J* = 7.3 Hz, 1H), 7.62 – 7.50 (m, 2H), 7.49 – 7.35 (m, 3H), 7.21 – 6.95 (m, 1H), 6.05 (d, *J* = 14.1 Hz, 2H), 5.24 (brs, 1H), 5.02 (brs, 1H), 4.18 (brs, 1H), 3.85 (brs, 1H), 3.65 – 3.50 (m, 2H), 2.35 – 2.23 (m, 1H), 2.14 (s, 3H), 2.02 – 1.92 (m, 1H). <sup>13</sup>C NMR (151 MHz, DMSO-*d*<sub>6</sub>) δ 170.0, 169.2, 161.9, 154.1, 145.5, 133.9, 129.2, 128.7, 127.7, 95.0, 88.0, 86.3, 75.0, 69.7, 60.8, 40.9, 20.4. IR (neat, cm<sup>-1</sup>): 3348, 1741, 1723, 1632, 1483. HRMS (ESI) Calcd. for C<sub>19</sub>H<sub>22</sub>N<sub>3</sub>O<sub>7</sub> (M+H)<sup>+</sup>: 404.1452, Found: 404.1451.

#### Methyl (*tert*-butoxycarbonyl)-*D*-tryptophyl-*L*-leucinate (entry 7)

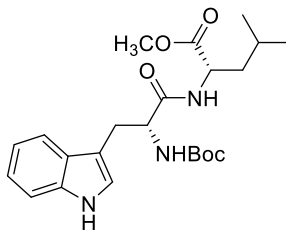

A mixture of Boc-*D*-trp-OH (50 mg, 0.164 mmol), diselenide **6h** (3 mg, 0.0041 mmol) and 4 Å molecular sieves (100 mg) in dry CH<sub>3</sub>CN (0.8 mL, 0.2M) was treated with P(OEt)<sub>3</sub> (42 µL, 0.246 mmol), followed by *L*-leucine methyl ester hydrochloride (33 mg, 0.180 mmol) and DIPEA (32 µL, 0.742mmol) according to the general procedure. The coupling reaction was stirred for 16 h under dry air at 30 °C and purified by flash column chromatography using SiO<sub>2</sub> and 30% EtOAc in hexane to give the pure amide **8** as a thick yellow oil (62 mg, 88% yield). <sup>1</sup>H NMR (600 MHz, chloroform-*d*) δ 8.28 (s, 1H), 7.66 (d, *J* = 7.9 Hz, 1H), 7.37 (d, *J* = 8.1 Hz, 1H), 7.21 (t, *J* = 7.5 Hz, 1H), 7.14 (t, *J* = 7.5 Hz, 1H), 7.09 (s, 1H), 6.24 (d, *J* = 8.1 Hz, 1H), 5.16 (s, 1H), 4.52 (s, 2H), 3.67 (s, 3H), 3.39 – 3.28 (m, 1H), 3.22 (dd, *J* = 14.9, 7.2 Hz, 1H), 1.58 – 1.30 (m, 12H), 0.83 (d, *J* = 6.5 Hz, 6H). <sup>13</sup>C NMR (151 MHz, chloroform-*d*) δ 173.1, 171.6, 155.5, 136.2, 127.5, 123.1, 122.3, 119.8, 118.8, 111.2, 110.5, 80.2, 55.2, 52.2, 50.7, 41.2, 28.3, 24.5, 22.7, 21.8. IR (neat, cm<sup>-1</sup>): 3315, 2957, 1726, 1709, 1658. HRMS (ESI) Calcd. for C<sub>23</sub>H<sub>34</sub>N<sub>3</sub>O<sub>5</sub> (M+H)<sup>+</sup>: 432.2504, Found: 432.2504.

#### *N*-(2-(1*H*-Indol-3-yl)ethyl)-3,7-dimethyloct-6-enamide (entry 8)

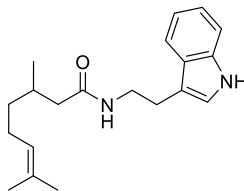

A mixture of citronellic acid (50 mg, 0.294 mmol), diselenide **6h** (5 mg, 0.0074 mmol) and 4 Å molecular sieves (100 mg) in dry CH<sub>3</sub>CN (1.5 mL, 0.2M) was treated with P(OEt)<sub>3</sub> (76 µL, 0.385 mmol), followed by tryptamine (52 mg, 0.323 mmol) according to the general procedure. The coupling reaction was stirred for 16 h under dry air at 30 °C and purified by flash column chromatography using SiO<sub>2</sub> and 10% and 20% EtOAc in hexane to give **9** (74 mg, 81% yield) and **9'** (6 mg, 8% yield), respectively, as thick oils.

For compound **9**: <sup>1</sup>H NMR (400 MHz, chloroform-*d*) δ 8.43 (s, 1H), 7.61(d, *J* = 8.4 Hz, 1H), 7.38 (d, *J* = 8.2 Hz, 1H), 7.21 (t, *J* = 8.2 Hz, 1H), 7.12 (t, *J* = 7.8 Hz, 1H), 7.01 (d, *J* = 2.3 Hz, 1H), 5.60 (t, *J* = 5.9 Hz, 1H), 5.07 (t, *J* = 7.3 Hz, 1H), 3.61 (q, *J* = 6.5 Hz, 2H), 2.97 (t, *J* = 6.8 Hz, 2H), 2.14 (dd, *J* = 13.4, 5.6 Hz, 1H), 2.07 – 1.89 (m, 3H), 1.85 (dd, *J* = 13.4, 8.4 Hz, 1H), 1.67 (s, 3H), 1.59 (s, 3H), 1.38 - 1.28 (m, 1H), 1.20 – 1.10 (m, 1H), 0.90 (d, *J* = 6.5 Hz, 3H). <sup>13</sup>C NMR (101 MHz, chloroform-*d*) δ 172.6, 136.4, 131.5, 127.3, 124.3, 122.1, 122.1, 119.4, 118.7, 112.8, 111.3, 44.6, 39.6, 36.9, 30.4, 25.7, 25.5, 25.4, 19.5, 17.7. IR (neat, cm<sup>-1</sup>): 3403, 3279, 1641. HRMS (ESI) Calcd. for C<sub>20</sub>H<sub>29</sub>N<sub>2</sub>O (M+H)<sup>+</sup>: 313.2274, Found: 313.2269.

For compound **8'**:

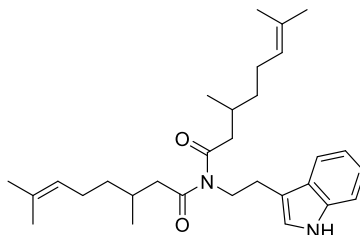

<sup>1</sup>H NMR (600 MHz, chloroform-*d*) δ 8.00 (s, 1H), 7.66 (d, *J* = 7.9 Hz, 1H), 7.37 (d, *J* = 8.0 Hz, 1H), 7.21 (t, *J* = 8.2 Hz, 1H), 7.15 (t, *J* = 7.9 Hz, 1H), 7.00 (d, *J* = 2.3 Hz, 1H), 5.07 (t, *J* = 7.2 Hz, 2H), 4.03 – 3.84 (m, 2H), 3.03 (t, *J* = 7.5 Hz, 2H), 2.58 (ddd, *J* = 16.2, 5.5, 3.4 Hz, 2H), 2.39 (ddd, *J* = 16.2, 8.0, 2.3 Hz, 2H), 2.06 – 1.88 (m, 6H), 1.67 (s, 6H), 1.59 (s, 6H), 1.34 – 1.25 (m, 2H), 1.17 – 1.10 (m, 2H), 0.88 (d, *J* = 6.6 Hz, 6H). <sup>13</sup>C NMR (151 MHz, chloroform-*d*) δ 176.0, 136.3, 131.4, 127.3, 124.4, 122.3, 119.7, 118.6, 112.6, 111.3, 45.2, 45.1, 36.9, 29.7, 29.6, 25.7, 25.5, 25.2, 19.7, 17.7. IR (neat, cm<sup>-1</sup>): 2959, 2922, 1696. HRMS (ESI) Calcd. for C<sub>30</sub>H<sub>45</sub>N<sub>2</sub>O<sub>2</sub> (M+H)<sup>+</sup>: 465.3476, Found: 465.3477.

**N-(3-(4-Chlorobenzoyl)-4,5,6,7-tetrahydrobenzo[*b*]thiophen-2-yl)pent-4-ynamide (entry 9)**

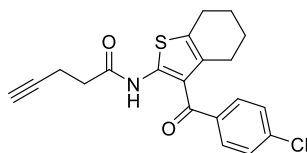

A mixture of 4-pentynoic acid (50 mg, 0.510 mmol), diselenide **6h** (3 mg, 0.012 mmol) and 4 Å molecular sieves (100 mg) in dry CH<sub>3</sub>CN (2.5 mL, 0.2M) was treated with P(OEt)<sub>3</sub> (131 µL, 0.765 mmol), followed by (2-amino-4,5,6,7-tetrahydrobenzo[*b*]thiophen-3-yl)(4-chlorophenyl)methanone (163 mg, 0.561 mmol) according to the general procedure. The coupling reaction was stirred for 16 h under dry air at 30 °C and purified by flash column chromatography using SiO<sub>2</sub> and 20% ethyl acetate in hexane to give the pure amide **10** as a yellow oil (148 mg, 78% yield). <sup>1</sup>H NMR (600 MHz, chloroform-*d*) δ 11.37 (s, 1H), 7.50 (d, *J* = 8.5 Hz, 2H), 7.43 (d, *J* = 8.5 Hz, 2H), 2.73 – 2.69 (m, 2H), 2.69 (t, *J* = 6.4 Hz, 2H), 2.65–2.61 (m, 2H), 2.01 (t, *J* = 2.6 Hz, 2H), 1.93 (t, *J* = 6.4 Hz, 2H), 1.81 – 1.75 (m, 2H), 1.57 – 1.51 (m, 2H). <sup>13</sup>C NMR (151 MHz, chloroform-*d*) δ 193.5, 168.5, 148.3, 139.0, 137.9, 129.7, 129.5, 128.6, 128.2, 121.0, 82.1, 69.7, 35.7, 27.6, 24.3, 22.9, 22.8, 14.5. IR (neat, cm<sup>-1</sup>): 3302, 2361, 2337, 1684, 1551. HRMS (ESI) Calcd. for C<sub>20</sub>H<sub>19</sub>NO<sub>2</sub>ClS (M+H)<sup>+</sup>: 372.0819, Found: 372.0818.

***N*-((2*S*,3*S*,4*R*)-1,3,4-Trihydroxyoctadecan-2-yl)-[1,1'-biphenyl]-4-carboxamide (entry 10)**

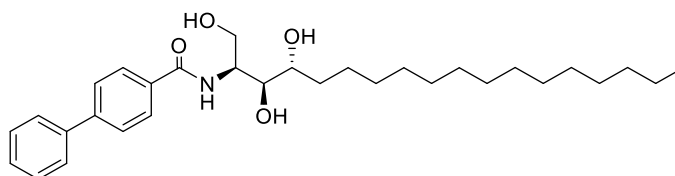

A mixture of biphenyl-4-carboxylic acid (50 mg, 0.252 mmol), diselenide **6h** (4 mg, 0.0063 mmol) and 4 Å molecular sieves (100 mg) in dry CH<sub>3</sub>CN (1.3 mL, 0.2M) was treated with P(OEt)<sub>3</sub> (65 µL, 0.385 mmol), followed by phytosphingosine (75 mg, 0.283 mmol) according to the general procedure. The coupling reaction was stirred for 16 h under dry air at 55 °C and purified by flash column chromatography using SiO<sub>2</sub> and 10% MeOH in CH<sub>2</sub>Cl<sub>2</sub> to give the pure amide **11** as a white solid (102 mg, 82% yield). Mp = 163 – 165 °C. <sup>1</sup>H NMR (600 MHz, DMSO-*d*<sub>6</sub>) δ 8.01 (d, *J* = 8.7 Hz, 1H), 7.93 (d, *J* = 8.4 Hz, 2H), 7.75 (d, *J* = 8.4 Hz, 2H), 7.73 – 7.69 (m, 2H), 7.47 (t, *J* = 7.7 Hz, 2H), 7.42 – 7.37 (m, 1H), 4.71 (d, *J* = 5.3 Hz, 1H), 4.52 (t, *J* = 5.7 Hz, 1H), 4.35 (d, *J* = 6.7 Hz, 1H), 4.14 (dtd, *J* = 8.7, 6.5, 4.3 Hz, 1H), 3.71 – 3.65 (m, 1H), 3.59 (dt, *J* = 10.9, 6.4 Hz, 1H), 3.52 (q, *J* = 5.7 Hz, 1H), 3.40 (dtd, *J* = 9.2, 6.3, 2.4 Hz, 1H), 1.58 – 1.51 (m, 1H), 1.39 (s, 1H), 1.31 – 1.10 (m, 27H), 0.83 (t, *J* = 6.9 Hz, 3H). <sup>13</sup>C NMR (151 MHz, DMSO-*d*<sub>6</sub>) δ 166.1, 143.0, 139.7, 134.2, 129.5, 128.4, 127.3, 126.8, 74.9, 71.3, 60.8, 53.7, 32.3, 31.8, 29.6, 29.6, 29.5, 29.5, 29.5, 29.2, 25.7, 22.6, 14.4. IR (neat, cm<sup>-1</sup>): 3334 (broad), 1619, 1541. HRMS (ESI) Calcd. for C<sub>31</sub>H<sub>48</sub>NO<sub>4</sub> (M+H)<sup>+</sup>: 498.3578, Found: 498.3569.

**(9*Z*,12*Z*)-*N*-((1*S*,2*R*)-2-Hydroxy-1,2-diphenylethyl)octadeca-9,12-dienamide (entry 11)**

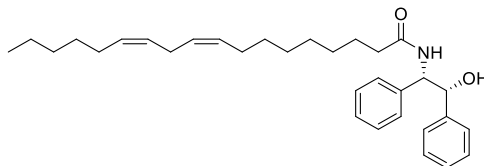

A mixture of linoleic acid (50 mg, 0.178 mmol), diselenide **6h** (3 mg, 0.0045 mmol) and 4 Å molecular sieves (100 mg) in dry CH<sub>3</sub>CN (890 µL, 0.2M) was treated with P(OEt)<sub>3</sub> (46 µL, 0.267 mmol), followed by (1*R*,2*S*)-2-amino-1,2-diphenylethan-1-ol (42 mg, 0.196 mmol) according to the general procedure. The coupling reaction was stirred for 16 h under dry air at 50 °C and purified by flash column chromatography using SiO<sub>2</sub> and 25% ethyl acetate in hexane to give the pure amide **12** as a



white solid (53 mg, 63% yield). Mp = 110 – 112 °C. <sup>1</sup>H NMR (600 MHz, chloroform-*d*) δ 7.26 – 7.18 (m, 6H), 7.05–6.99 (m, 4H), 6.17 (d, *J* = 8.0 Hz, 1H), 5.50 – 5.24 (m, 5H), 5.07 (t, *J* = 4.3 Hz, 1H), 3.06 (d, *J* = 4.8 Hz, 1H), 2.77 (t, *J* = 6.9 Hz, 2H), 2.21 (t, *J* = 7.6 Hz, 2H), 2.10 – 1.95 (m, 4H), 1.46 – 1.22 (m, 15H), 10.89 (t, *J* = 6.9 Hz, 3H). <sup>13</sup>C NMR (151 MHz, chloroform-*d*) δ 173.3, 139.7, 137.2, 130.2, 130.0, 128.2, 128.1, 128.0, 127.9, 127.8, 127.8, 127.7, 126.6, 59.3, 36.8, 31.5, 29.6, 29.4, 29.3, 29.2, 27.2, 25.7, 25.6, 22.6, 14.1. IR (neat, cm<sup>-1</sup>): 3313, 1640, 1540. HRMS (ESI) Calcd. for C<sub>32</sub>H<sub>46</sub>NO<sub>2</sub> (M+H)<sup>+</sup>: 476.3523, Found: 476.3517.

**Benzyl *N*<sup>2</sup>-(*tert*-butoxycarbonyl)-*N*<sup>5</sup>-(2-ethoxy-2-oxoethyl)-*N*<sup>5</sup>-methyl-*D*-glutamate (entry 12)**

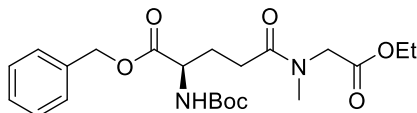

A mixture of Boc-*D*-glu(OBzl)-OH (50 mg, 0.148 mmol), diselenide **6h** (3 mg, 0.0037 mmol) and 4 Å molecular sieves (100 mg) in dry CH<sub>3</sub>CN (750 μL, 0.2M) was treated with P(OEt)<sub>3</sub> (38 μL, 0.222 mmol), followed by sarcocine ethyl ester hydrochloride (25 mg, 0.163 mmol) and DIPEA (28 μL, 0.163 mmol) according to the general procedure. The coupling reaction was stirred for 16 h under dry air at 30 °C and purified by flash column chromatography using SiO<sub>2</sub> and 25% ethyl acetate in hexane to give the pure amide **13** as a thick oil (60 mg, 92% yield). <sup>1</sup>H NMR (400 MHz, chloroform-*d*) δ 7.58 – 7.27 (m, 4H), 5.40 (d, *J* = 8.5 Hz, 0.8H), 5.33 (d, *J* = 8.5 Hz, 0.2H), 5.18 – 5.07 (m, 2H), 4.78 (td, *J* = 8.9, 3.8 Hz, 0.8H), 4.59 (td, *J* = 8.9, 3.8 Hz, 0.2H), 4.41 – 4.08 (m, 3H), 3.86 (d, *J* = 17.3 Hz, 1H), 3.16 (s, 2.4H), 2.96 (s, 0.6H), 2.62 – 2.36 (m, 2H), 2.21 – 2.08 (m, 1H), 1.81 – 1.63 (m, 2H), 1.42 (s, 7H), 1.41 (s, 2H), 1.27 (t, *J* = 7.1 Hz, 0.6H), 1.25 (t, *J* = 7.1 Hz, 2.4H). <sup>13</sup>C NMR (151 MHz, chloroform-*d*) δ 172.8, 172.5, 168.8, 168.7, 155.6, 135.9, 128.5, 128.2, 128.2, 79.7, 66.4, 66.4, 61.7, 61.3, 60.4, 51.3, 49.7, 49.3, 49.2, 36.4, 35.0, 29.7, 29.5, 29.5, 28.5, 28.3, 28.3, 28.2, 28.1, 21.0, 14.2, 14.1, 14.1. IR (neat, cm<sup>-1</sup>): 3403 (broad), 1733, 1706, 1647. HRMS (ESI) Calcd. for C<sub>22</sub>H<sub>33</sub>N<sub>2</sub>O<sub>7</sub> (M+H)<sup>+</sup>: 437.2282, Found: 437.2285.

**Dibenzyl (6-((4,4-diethoxybutyl)amino)-6-oxohexane-1,5-diyl)(*R*)-dicarbamate (entry 13)**

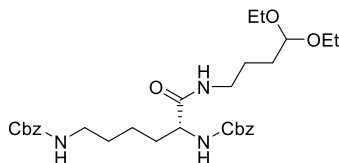

A mixture of N<sub>α</sub>,N<sub>ε</sub>-di-*Z*-*L*-lysine (50 mg, 0.120 mmol), diselenide **6h** (2 mg, 0.003 mmol) and 4 Å molecular sieves (100 mg) in dry CH<sub>3</sub>CN (600 μL, 0.2M) was treated with P(OEt)<sub>3</sub> (31 μL, 0.180 mmol), followed by 4-aminobutyraldehyde diethyl acetal (21.4 mg, 0.132 mmol) according to the general procedure. The coupling reaction was stirred for 16 h under dry air at 30 °C and purified by flash column chromatography using SiO<sub>2</sub> and 20% ethyl acetate in hexane to give the pure amide **14** as a white solid (56 mg, 83% yield). Mp = 108 – 110 °C. <sup>1</sup>H NMR (400 MHz, chloroform-*d*) δ 7.40 – 7.27 (m, 10H), 6.40 – 6.30 (m, 1H), 5.57 (d, *J* = 7.9 Hz, 1H), 5.17 – 5.00 (m, 4H), 4.98 – 4.90 (m, 1H), 4.46 (t, *J* = 5.2 Hz, 1H), 4.15 – 4.00 (m, 1H), 3.62 (dq, *J* = 9.0, 7.0, 1.9 Hz, 2H), 3.47 (dq, *J* = 9.4, 7.0 Hz, 2H), 3.30 – 3.20 (m, 2H), 3.20 – 3.10 (m, 2H), 1.90 – 1.73 (m, 2H), 1.70 – 1.43 (m, 6H), 1.35 (p, *J* = 7.1 Hz, 2H), 1.18 (td, *J* = 7.1, 1.2 Hz, 6H). <sup>13</sup>C NMR (151 MHz, chloroform-*d*) δ 171.5, 156.7, 156.3, 136.6, 136.2, 128.5, 128.5, 128.4, 128.2, 128.1, 102.6, 67.1, 66.7, 61.5, 61.4, 54.9, 40.2, 39.3, 32.0, 30.9, 29.4, 24.4, 22.3, 15.3. IR (neat, cm<sup>-1</sup>): 3294, 1690, 1680, 1641, 1533. HRMS (ESI) Calcd. for C<sub>30</sub>H<sub>43</sub>N<sub>3</sub>O<sub>7</sub>Na (M+Na)<sup>+</sup>: 580.2993, Found: 580.2995.

**Methyl *N*-(((benzyloxy)carbonyl)-*L*-tyrosyl)-*N*-methyl-*L*-leucinate (entry 14)**

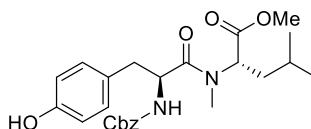

A mixture of *N*-carbobenzoxy-*L*-tyrosine (50 mg, 0.158 mmol), diselenide **6h** (3 mg, 0.0039 mmol) and 4 Å molecular sieves (100 mg) in dry CH<sub>3</sub>CN (0.8 mL, 0.2M) was treated with P(OEt)<sub>3</sub> (38 µL, 0.222 mmol), followed by *N*-methyl methyl-*L*-leucinate hydrochloride (25 mg, 0.163 mmol) and DIPEA (28 µL, 0.163 mmol) according to the general procedure. The coupling reaction was stirred for 16 h under dry air at 30 °C and purified by flash column chromatography using SiO<sub>2</sub> and 40% EtOAc in hexane to give the pure amide **15** as a thick oil (46 mg, 63% yield). <sup>1</sup>H NMR (399 MHz, chloroform-*d*) δ 7.39 – 7.28 (m, 5H), 7.02 (d, *J* = 8.6 Hz, 2H), 6.66 (d, *J* = 8.7 Hz, 2H), 5.90 (brs, 1H), 5.60 (d, *J* = 8.8 Hz, 1H), 5.28 (dd, *J* = 10.4, 5.3 Hz, 1H), 5.14 – 4.96 (m, 2H), 4.88 (dd, *J* = 15.1, 6.5 Hz, 1H), 3.69 (s, 3H), 3.03 (dd, *J* = 13.9, 6.8 Hz, 1H), 2.86 (s, 3H), 2.84 (dd, *J* = 13.9, 5.3 Hz, 1H), 1.79 – 1.62 (m, 2H), 1.50 – 1.35 (m, 1H), 0.92 (d, *J* = 6.6 Hz, 3H), 0.87 (d, *J* = 6.6 Hz, 3H). <sup>13</sup>C NMR (151 MHz, chloroform-*d*) δ 172.3, 171.9, 155.8, 155.0, 136.3, 130.7, 130.6, 128.5, 128.1, 127.9, 127.4, 115.4, 115.4, 66.9, 54.7, 52.3, 52.2, 37.9, 37.1, 31.1, 29.7, 24.8, 23.2, 21.4. IR (neat, cm<sup>-1</sup>): 3297, 1734, 1700, 1635. HRMS (ESI) Calcd. for C<sub>25</sub>H<sub>33</sub>N<sub>2</sub>O<sub>6</sub> (M+H)<sup>+</sup>: 457.2333, Found: 457.2328.

**1-Ethyl-*N*-(4-methoxybenzyl)-7-methyl-4-oxo-1,4-dihydro-1,8-naphthyridine-3-carboxamide (entry 15)**

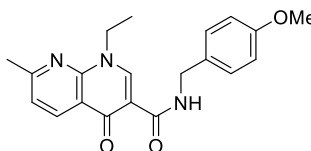

A mixture of nalidixic acid (50 mg, 0.215 mmol), diselenide **6h** (4 mg, 0.0054 mmol) and 4 Å molecular sieves (100 mg) in dry CH<sub>3</sub>CN (1.1 mL, 0.2M) was treated with P(OEt)<sub>3</sub> (55 µL, 0.323 mmol), followed by 4-methoxybenzylamine (31 µL, 0.237 mmol) according to the general procedure. The coupling reaction was stirred for 28 h under dry air at 55 °C and purified by flash column chromatography using SiO<sub>2</sub> and 5% MeOH in CH<sub>2</sub>Cl<sub>2</sub> to give the pure amide **16** as a white solid (51 mg, 68% yield). Mp = 188 – 190 °C. <sup>1</sup>H NMR (600 MHz, chloroform-*d*) δ 10.23 (t, *J* = 6.5 Hz, 1H), 8.93 (s, 1H), 8.62 (d, *J* = 8.1 Hz, 1H), 7.31 (d, *J* = 8.7 Hz, 2H), 7.28 (d, *J* = 8.1 Hz, 1H), 6.86 (d, *J* = 8.7 Hz, 2H), 4.61 (d, *J* = 5.7 Hz, 2H), 4.55 (q, *J* = 7.2 Hz, 2H), 3.79 (s, 3H), 2.69 (s, 3H), 1.50 (t, *J* = 7.2 Hz, 3H). <sup>13</sup>C NMR (151 MHz, chloroform-*d*) δ 176.9, 164.6, 163.2, 158.7, 148.5, 147.4, 136.3, 131.0, 129.0, 121.2, 120.3, 114.0, 112.9, 55.3, 46.8, 42.8, 25.2, 15.2. IR (neat, cm<sup>-1</sup>): 3180 (broad), 1658, 1604. HRMS (ESI) Calcd. for C<sub>20</sub>H<sub>22</sub>N<sub>3</sub>O<sub>3</sub> (M+H)<sup>+</sup>: 352.1656, Found: 352.1654.

**Methyl (8-((4-chlorophenyl)sulfonamido)-4-(3-(pyridin-3-yl)propyl)octanoyl)-*L*-valinate (entry 16)**

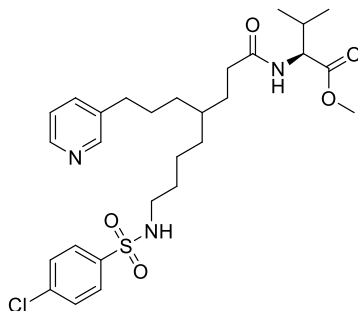

A mixture of 8-(4-chlorophenylsulfonamido)-4-(3-(pyridin-3-yl)propyl)octanoic acid (30 mg, 0.066 mmol), diselenide **6h** (1 mg, 0.00165 mmol) and 4 Å molecular sieves (60 mg) in dry CH<sub>3</sub>CN (0.3 mL, 0.2M) was treated with P(OEt)<sub>3</sub> (17 µL, 0.099 mmol), followed by L-valine methyl ester hydrochloride (12 mg, 0.073 mmol) and DIPEA (13 µL, 0.073 mmol) according to the general procedure. The coupling reaction was stirred for 16 h under dry air at 30 °C and purified by flash column chromatography using SiO<sub>2</sub> and 30% EtOAc in hexane to give the pure amide **17** as a white solid (34 mg, 92% yield). (It is a 1:1 mixture of diastereomers) <sup>1</sup>H NMR (600 MHz, chloroform-*d*) δ 8.36 (brs, 2H), 7.76 – 7.69 (m, 2H), 7.51 – 7.44 (m, 3H), 7.14 (2xd, *J* = 4.9 Hz, 1H), 6.02 (2xd, *J* = 8.5 Hz, 1H), 5.13 (2xt, *J* = 6.1 Hz, 1H), 4.49 (2xdd, *J* = 5.3, 8.5 Hz, 1H), 3.66 (2xs, 3H), 2.95 – 2.80 (m, 2H), 2.51 (t, *J* = 7.6 Hz, 2H), 2.17 – 2.03 (m, 3H), 1.59 – 1.45 (m, 4H), 1.42 – 1.31 (m, 2H), 1.21 – 1.08 (m, 7H), 0.88 – 0.81 (m, 6H). <sup>13</sup>C NMR (151 MHz, chloroform-*d*) δ 173.1, 173.1, 173.0, 172.8, 149.8, 147.2, 138.9, 138.8, 137.7, 135.9, 129.3, 128.5, 123.4, 57.0, 56.9, 52.2, 52.2, 43.0, 36.7, 36.5, 33.7, 33.6, 33.2, 33.2, 32.9, 32.8, 32.4, 32.3, 31.2, 29.7, 29.5, 28.9, 28.9, 28.0, 23.3, 23.2, 19.0, 19.0, 17.9, 17.9. IR (neat, cm<sup>-1</sup>): 3328 (broad), 1740, 1649, 1157. HRMS (ESI) Calcd. for C<sub>30</sub>H<sub>32</sub>N<sub>9</sub>OS (M+H)<sup>+</sup>: 566.2445, Found: 566.2443.

### Optimized procedure for the synthesis of racemization sensitive peptides:

#### Methyl ((benzyloxy)carbonyl)glycyl- *L*-phenylalanyl- *L*-valinate (entry **17**)<sup>10-11</sup>

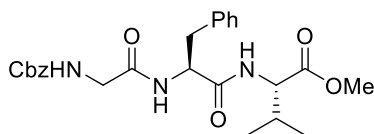

A 12 mL test tube was charged with 4 Å molecular sieves (140 mg) previously activated in a microwave oven for 3 min and dried under reduced pressure for 5 min. Then, Z-Gly-L-Phe-OH (100 mg, 0.281 mmol), L-Val-OMe•HCl (56 mg, 0.337 mmol), anhydrous CuCl<sub>2</sub> (37.7 mg, 0.281 mmol), and diselenide **6g** (5 mg, 0.007 mmol) were added along with dry acetonitrile (1.4 mL, 0.2M, moisture content <25 ppm). The reaction mixture was cooled to 0 °C, DIPEA (39.9 mg, 0.309 mmol) and triethylphosphite (69.9 mg, 0.421 mmol) were added sequentially at 0 °C. The reaction mixture was allowed slowly to rise in temperature to 23 °C and stirred for 18 h under a dry air atmosphere (balloon) at 23 °C. The reaction mixture was filtered, washed with CH<sub>2</sub>Cl<sub>2</sub> (20 ml), and concentrated under reduced pressure to give the crude product **18**. The diastereomeric ratio of the crude product determined as 98:2 through HPLC using chiral OJ-RH stationary phase. The crude product was purified by silica gel flash column chromatography using ethyl acetate and hexanes as mobile phase to give pure tripeptide **18** in 68% yield (89 mg, 0.190 mmol) as a white solid. The spectroscopic data are consistent with those reported in literature.

**HPLC conditions:** Column: Chiral AS-RH (0.46 X 15 cm);  $\lambda$  = 254 nm; Flow rate: 0.7 mL/min; Mobile phase: 30 – 40 % CH<sub>3</sub>CN in H<sub>2</sub>O for 10 min, 40 – 45 % CH<sub>3</sub>CN in H<sub>2</sub>O for 5 min, 45 – 50 % CH<sub>3</sub>CN in H<sub>2</sub>O for 10 min; major isomer Ret. Time = 20.8 min, minor isomer Ret. Time = 21.8 min.

Optimization:

*Table S4*

| entry | reagents and conditions                                                                                                      | <i>dr</i> |
|-------|------------------------------------------------------------------------------------------------------------------------------|-----------|
| 1     | Followed general procedure                                                                                                   | 60:40     |
| 2     | DIPEA and triethylphosphite were added at 0 °C and stirred at 23 °C                                                          | 70:30     |
| 3     | 1.0 equiv of anhydrous CuCl <sub>2</sub> was added, then DIPEA and triethylphosphite were added at 0 °C and stirred at 23 °C | 98:2      |

### Experimental procedure for UV-vis studies:

A 2.5 mL solution of 0.04 mM diselenide **6h** in CH<sub>3</sub>CN was placed in a UV cuvette with a screw cap in the absence of air and its UV absorption spectrum was measured. (**Figure 1**)

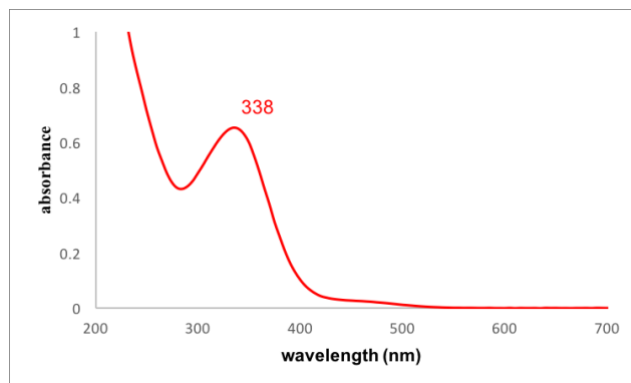

**Figure S1:** UV absorption spectrum of **6h** (0.04mM in CH<sub>3</sub>CN)

50  $\mu$ L of 2mM P(OEt)<sub>3</sub> and 100  $\mu$ L of 2mM toluic acid were added into the same cuvette in the absence of air. It was monitored over 30 cycles for every half minute. Almost complete transformation of **6h** into a new product took place within 15 minutes. (**Figure 2**)

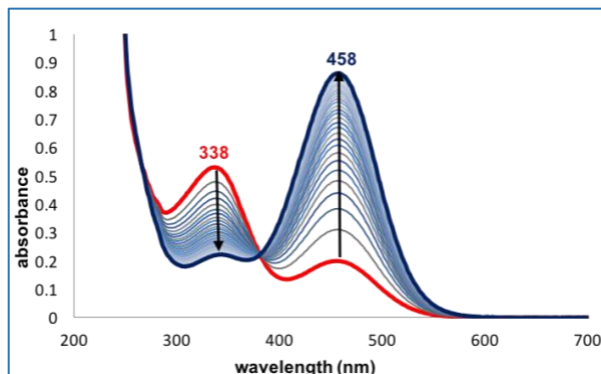

**Figure S2:** transformation of **6h** (0.04 mM in CH<sub>3</sub>CN) into selenide **5h** within 15 min

After that, the solution was exposed to dry air through a balloon and the regeneration of **6h** was monitored over a period of 15 hours. (**Figure 3**)

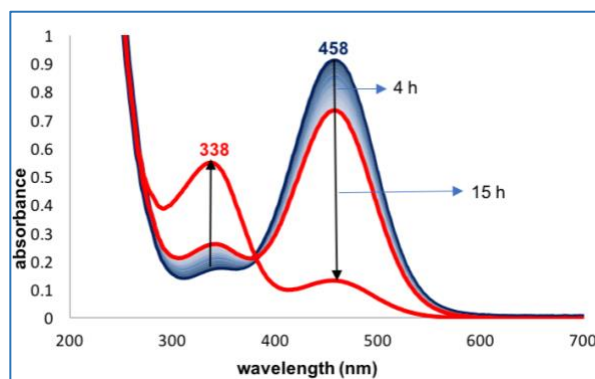

**Figure S3:** regeneration of **6h** under air over 15 h

#### Structure determination of *N*-(2-(dimethylamino)ethyl)-2-hydroseleno-*N*-methyl-5-nitrobenzamide (**5h**)

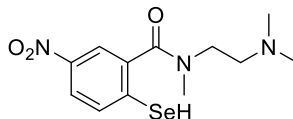

To a solution of **6h** (24 mg, 0.036 mmol) in CD<sub>3</sub>CN (0.5 mL) in an NMR tube was added P(OEt)<sub>3</sub> (6 μL, 0.036 mmol) and toluic acid (5 mg, 0.036 mmol) under an argon atmosphere. After standing at room temperature for 24 hours orange reddish crystals of **5h** formed. These crystals were collected by filtration and analyzed by X-ray crystallography. CCDC 1577749 contains the supplementary crystallographic data for this paper. These data are provided free of charge by The Cambridge Crystallographic Data Centre. In **5h** the tertiary amidic moiety ortho to the selenium is almost fully orthogonal to the aromatic ring (N2-C7-C6-C1 torsion angle = 90.31°)

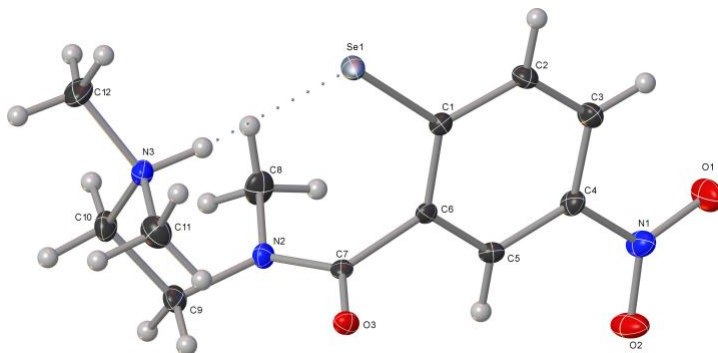

**Experimental.** Single red prism-shaped crystals of **5h** were chosen from the sample as supplied. A suitable crystal (0.23×0.16×0.07 mm<sup>3</sup>) was selected and mounted on a loop with paratone oil on a XtaLAB Synergy, Dualflex, HyPix diffractometer. The crystal was cooled to  $T = 100(2)$  K during data collection. The structure was solved with the **ShelXT** (Sheldrick, 2015) structure solution program using the Intrinsic Phasing solution method and by using **Olex2** (Dolomanov et al., 2009) as the graphical interface. The model was refined with version 2014/7 of **ShelXL-2014** (Sheldrick, 2015) using Least Squares minimisation.

**Crystal Data.** C<sub>14</sub>H<sub>20</sub>N<sub>4</sub>O<sub>3</sub>Se,  $M_r = 371.30$ , monoclinic, P2<sub>1</sub>/n (No. 14),  $a = 6.0940(3)$  Å,  $b = 12.4007(6)$  Å,  $c = 22.2062(9)$  Å,  $\beta = 94.542(4)^\circ$ ,  $\alpha = \gamma = 90^\circ$ ,  $V = 1672.85(13)$  Å<sup>3</sup>,  $T = 100(2)$  K,  $Z = 4$ ,  $Z' = 1$ ,  $\mu(\text{MoK}\alpha) = 2.262$  mm<sup>-1</sup>, 15838 reflections measured, 5096 unique ( $R_{\text{int}} = 0.0492$ ) which were used in all calculations. The final  $wR_2$  was 0.0795 (all data) and  $R_1$  was 0.0357 ( $I > 2\sigma(I)$ ).

| Compound                          | 5h                                                               |
|-----------------------------------|------------------------------------------------------------------|
| Formula                           | C <sub>14</sub> H <sub>20</sub> N <sub>4</sub> O <sub>3</sub> Se |
| $D_{calc}/\text{g cm}^{-3}$       | 1.474                                                            |
| $\mu/\text{mm}^{-1}$              | 2.262                                                            |
| Formula Weight                    | 371.30                                                           |
| Colour                            | red                                                              |
| Shape                             | prism                                                            |
| Size/mm <sup>3</sup>              | 0.23×0.16×0.07                                                   |
| $T/\text{K}$                      | 100(2)                                                           |
| Crystal System                    | monoclinic                                                       |
| Space Group                       | P2 <sub>1</sub> /n                                               |
| $a/\text{\AA}$                    | 6.0940(3)                                                        |
| $b/\text{\AA}$                    | 12.4007(6)                                                       |
| $c/\text{\AA}$                    | 22.2062(9)                                                       |
| $\alpha/^\circ$                   | 90                                                               |
| $\beta/^\circ$                    | 94.542(4)                                                        |
| $\gamma/^\circ$                   | 90                                                               |
| $V/\text{\AA}^3$                  | 1672.85(13)                                                      |
| $Z$                               | 4                                                                |
| $Z'$                              | 1                                                                |
| Wavelength/ $\text{\AA}$          | 0.71073                                                          |
| Radiation type                    | MoK $\alpha$                                                     |
| $\theta_{min}/^\circ$             | 2.467                                                            |
| $\theta_{max}/^\circ$             | 30.508                                                           |
| Measured Refl.                    | 15838                                                            |
| Independent Refl.                 | 5096                                                             |
| Reflections with $I > 2\sigma(I)$ | 3990                                                             |
| $R_{int}$                         | 0.0492                                                           |
| Parameters                        | 207                                                              |
| Restraints                        | 46                                                               |
| Largest Peak                      | 0.808                                                            |
| Deepest Hole                      | -0.544                                                           |
| GooF                              | 1.060                                                            |
| $wR_2$ (all data)                 | 0.0795                                                           |
| $wR_2$                            | 0.0758                                                           |
| $R_1$ (all data)                  | 0.0536                                                           |
| $R_1$                             | 0.0357                                                           |

## Reflection Statistics

|                                     |                       |                            |                |
|-------------------------------------|-----------------------|----------------------------|----------------|
| Total reflections (after filtering) | 16276                 | Unique reflections         | 5096           |
| Completeness                        | 0.997                 | Mean $I/\sigma$            | 12.42          |
| $hkl_{max}$ collected               | (8, 17, 26)           | $hkl_{min}$ collected      | (-8, -17, -31) |
| $hkl_{max}$ used                    | (8, 17, 31)           | $hkl_{min}$ used           | (-8, 0, 0)     |
| Lim $d_{max}$ collected             | 100.0                 | Lim $d_{min}$ collected    | 0.36           |
| $d_{max}$ used                      | 8.26                  | $d_{min}$ used             | 0.7            |
| Friedel pairs                       | 2613                  | Friedel pairs merged       | 1              |
| Inconsistent equivalents            | 1                     | $R_{int}$                  | 0.0492         |
| $R_{sigma}$                         | 0.0608                | Intensity transformed      | 0              |
| Omitted reflections                 | 0                     | Omitted by user (OMIT hkl) | 0              |
| Multiplicity                        | (7258, 3513, 616, 36) | Maximum multiplicity       | 12             |
| Removed systematic absences         | 438                   | Filtered off (Shel/OMIT)   | 0              |

**Table S5:** Fractional Atomic Coordinates ( $\times 10^4$ ) and Equivalent Isotropic Displacement Parameters ( $\text{\AA}^2 \times 10^3$ ) for **5h**.  $U_{eq}$  is defined as 1/3 of the trace of the orthogonalised  $U_{ij}$ .

| Atom | x         | y          | z          | $U_{eq}$ |
|------|-----------|------------|------------|----------|
| Se1  | 4744.1(3) | 1125.5(2)  | 5466.6(2)  | 14.77(6) |
| O3   | 5213(2)   | 3753.1(11) | 4745.7(6)  | 13.3(3)  |
| O1   | 7936(3)   | 4752.1(13) | 7649.2(7)  | 27.5(4)  |
| O2   | 6959(3)   | 5867.2(12) | 6932.9(7)  | 27.3(4)  |
| N2   | 1807(2)   | 3590.0(13) | 5087.0(7)  | 12.7(3)  |
| N3   | 1215(3)   | 1694.1(14) | 4276.0(7)  | 14.7(3)  |
| N1   | 7218(3)   | 4943.0(14) | 7126.7(8)  | 18.3(4)  |
| C6   | 5019(3)   | 3382.2(15) | 5788.7(8)  | 10.5(3)  |
| C2   | 6614(3)   | 2155.9(16) | 6540.9(9)  | 15.1(4)  |
| C1   | 5502(3)   | 2315.3(15) | 5966.0(8)  | 11.5(3)  |
| C7   | 4028(3)   | 3593.9(14) | 5159.3(8)  | 10.2(3)  |
| C4   | 6640(3)   | 4045.3(15) | 6729.9(8)  | 14.1(4)  |
| C5   | 5575(3)   | 4245.5(16) | 6166.2(8)  | 11.9(3)  |
| C10  | -394(3)   | 2605.9(16) | 4287.2(9)  | 17.0(4)  |
| C11  | 2831(3)   | 1829.9(18) | 3816.8(9)  | 20.9(4)  |
| C3   | 7171(3)   | 3006.9(16) | 6922.9(9)  | 16.0(4)  |
| C9   | 676(3)    | 3669.0(16) | 4484.5(9)  | 15.7(4)  |
| C12  | -17(4)    | 661.4(18)  | 4187.8(11) | 24.6(5)  |
| C8   | 444(3)    | 3340.5(19) | 5579.1(9)  | 19.4(4)  |
| N4   | 2667(4)   | 2888(2)    | 7775.7(12) | 52.1(7)  |
| C14  | 2143(4)   | 1143(2)    | 7136.6(13) | 40.4(6)  |
| C13  | 2449(4)   | 2124(3)    | 7495.4(13) | 39.3(6)  |

**Table S6:** Anisotropic Displacement Parameters ( $\times 10^4$ ) **5h**. The anisotropic displacement factor exponent takes the form:  $-2\pi^2[h^2a^{*2} \times U_{11} + \dots + 2hka^* \times b^* \times U_{12}]$

| Atom | $U_{11}$ | $U_{22}$ | $U_{33}$  | $U_{23}$  | $U_{13}$ | $U_{12}$ |
|------|----------|----------|-----------|-----------|----------|----------|
| Se1  | 18.92(9) | 8.61(10) | 15.93(10) | -1.53(7)  | -4.08(6) | 0.74(7)  |
| O3   | 12.7(6)  | 13.8(7)  | 13.8(6)   | 1.4(5)    | 2.8(4)   | 0.3(5)   |
| O1   | 44.9(10) | 21.6(9)  | 14.5(7)   | -3.3(6)   | -7.6(7)  | -3.1(7)  |
| O2   | 50.4(10) | 12.9(8)  | 18.2(8)   | -0.4(6)   | -0.6(7)  | -5.6(7)  |
| N2   | 10.2(6)  | 13.7(8)  | 14.0(7)   | -0.3(6)   | 0.0(5)   | 0.2(5)   |
| N3   | 13.6(7)  | 13.4(9)  | 16.3(8)   | 0.0(6)    | -2.8(6)  | -1.4(6)  |
| N1   | 26.3(9)  | 14.0(9)  | 14.6(8)   | -2.2(6)   | 0.9(7)   | -3.4(7)  |
| C6   | 8.3(7)   | 11.4(9)  | 11.9(7)   | 1.0(6)    | 1.8(6)   | -1.4(6)  |
| C2   | 17.3(9)  | 12.6(10) | 15.2(9)   | 2.4(7)    | -0.9(7)  | 1.1(7)   |
| C1   | 11.5(8)  | 11.0(9)  | 12.3(8)   | -0.5(7)   | 1.6(6)   | -0.6(6)  |
| C7   | 12.0(7)  | 5.1(8)   | 13.1(7)   | -0.6(6)   | 0.0(5)   | 0.9(5)   |
| C4   | 17.6(9)  | 12.1(10) | 12.6(8)   | -3.5(7)   | 0.8(7)   | -2.3(7)  |
| C5   | 12.9(8)  | 10.1(9)  | 13.1(8)   | 1.1(7)    | 3.3(7)   | 0.0(6)   |
| C10  | 12.3(8)  | 17.2(11) | 20.9(10)  | -2.0(8)   | -3.5(7)  | 1.1(7)   |
| C11  | 23.7(10) | 22.8(12) | 16.1(9)   | -1.7(8)   | 1.4(8)   | 2.1(8)   |
| C3   | 19.5(9)  | 16.9(10) | 11.4(9)   | 1.6(7)    | -0.5(7)  | -1.8(7)  |
| C9   | 12.8(8)  | 14.4(10) | 19.3(10)  | 0.6(7)    | -2.9(7)  | 2.6(6)   |
| C12  | 26.3(11) | 12.8(11) | 33.1(12)  | 0.1(9)    | -7.1(9)  | -4.9(8)  |
| C8   | 12.0(8)  | 27.6(12) | 19.4(10)  | -2.0(8)   | 6.0(7)   | -1.5(8)  |
| N4   | 33.6(12) | 76.7(17) | 45.2(13)  | -13.8(12) | -2.6(10) | 1.0(11)  |
| C14  | 30.1(11) | 53.6(14) | 37.6(12)  | 1(1)      | 3.3(9)   | -2.1(10) |
| C13  | 33.5(9)  | 48(1)    | 35.9(9)   | -0.9(8)   | 0.4(7)   | 0.6(7)   |

**Table S7:** Bond Lengths in  $\text{\AA}$  for **5h**.



| Atom | Atom | Length/Å   |
|------|------|------------|
| Se1  | C1   | 1.8813(18) |
| O3   | C7   | 1.229(2)   |
| O1   | N1   | 1.230(2)   |
| O2   | N1   | 1.230(2)   |
| N2   | C7   | 1.350(2)   |
| N2   | C9   | 1.459(2)   |
| N2   | C8   | 1.457(3)   |
| N3   | C10  | 1.498(2)   |
| N3   | C11  | 1.482(3)   |
| N3   | C12  | 1.489(3)   |
| N1   | C4   | 1.446(2)   |
| C6   | C1   | 1.405(3)   |
| C6   | C7   | 1.501(2)   |
| C6   | C5   | 1.385(3)   |
| C2   | C1   | 1.411(2)   |
| C2   | C3   | 1.379(3)   |
| C4   | C5   | 1.386(2)   |
| C4   | C3   | 1.387(3)   |
| C10  | C9   | 1.520(3)   |
| N4   | C13  | 1.136(4)   |
| C14  | C13  | 1.457(4)   |

**Table S8:** Bond Angles in ° for **5h**.

| Atom | Atom | Atom | Angle/°    |
|------|------|------|------------|
| C7   | N2   | C9   | 120.33(17) |
| C7   | N2   | C8   | 122.49(16) |
| C8   | N2   | C9   | 116.49(15) |
| C11  | N3   | C10  | 113.40(16) |
| C11  | N3   | C12  | 111.26(17) |
| C12  | N3   | C10  | 109.10(15) |
| O1   | N1   | C4   | 118.55(17) |
| O2   | N1   | O1   | 122.39(17) |
| O2   | N1   | C4   | 119.05(16) |
| C1   | C6   | C7   | 119.05(16) |
| C5   | C6   | C1   | 121.49(16) |
| C5   | C6   | C7   | 119.30(17) |
| C3   | C2   | C1   | 121.76(18) |
| C6   | C1   | Se1  | 122.48(13) |
| C6   | C1   | C2   | 117.42(16) |
| C2   | C1   | Se1  | 120.09(14) |
| O3   | C7   | N2   | 123.71(16) |
| O3   | C7   | C6   | 120.48(16) |
| N2   | C7   | C6   | 115.81(16) |
| C5   | C4   | N1   | 119.12(17) |
| C5   | C4   | C3   | 121.76(17) |
| C3   | C4   | N1   | 119.12(16) |
| C6   | C5   | C4   | 118.86(18) |
| N3   | C10  | C9   | 113.12(14) |
| C2   | C3   | C4   | 118.70(17) |
| N2   | C9   | C10  | 111.52(16) |
| N4   | C13  | C14  | 179.4(3)   |

**Table S9:** Hydrogen Fractional Atomic Coordinates ( $\times 10^4$ ) and Equivalent Isotropic Displacement Parameters ( $\text{\AA}^2 \times 10^3$ ) for **5h**.  $U_{eq}$  is defined as 1/3 of the trace of the orthogonalised  $U_{ij}$ .

| Atom | x        | y        | z       | $U_{eq}$ |
|------|----------|----------|---------|----------|
| H2   | 6980     | 1458     | 6666    | 18       |
| H5   | 5239     | 4947     | 6043    | 14       |
| H10A | -1503    | 2425     | 4561    | 20       |
| H10B | -1131    | 2693     | 3887    | 20       |
| H11A | 2066     | 1893     | 3424    | 31       |
| H11B | 3791     | 1215     | 3825    | 31       |
| H11C | 3684     | 2470     | 3904    | 31       |
| H3A  | 7888     | 2887     | 7302    | 19       |
| H9A  | 1723     | 3876     | 4198    | 19       |
| H9B  | -442     | 4226     | 4483    | 19       |
| H12A | -1018    | 585      | 4498    | 37       |
| H12B | 1002     | 70       | 4210    | 37       |
| H12C | -828     | 664      | 3799    | 37       |
| H8A  | 384      | 2573     | 5633    | 29       |
| H8B  | -1016    | 3614     | 5484    | 29       |
| H8C  | 1066     | 3670     | 5945    | 29       |
| H14A | 2414     | 1295     | 6725    | 61       |
| H14B | 662      | 889      | 7153    | 61       |
| H14C | 3154     | 601      | 7295    | 61       |
| H3   | 2050(40) | 1660(20) | 4656(7) | 36(7)    |

### Crystallography Citations

O.V. Dolomanov and L.J. Bourhis and R.J. Gildea and J.A.K. Howard and H. Puschmann, Olex2: A complete structure solution, refinement and analysis program, *J. Appl. Cryst.*, (2009), **42**, 339-341.

Sheldrick, G.M., Crystal structure refinement with ShelXL, *Acta Cryst.*, (2015), **C27**, 3-8.

Sheldrick, G.M., ShelXT-Integrated space-group and crystal-structure determination, *Acta Cryst.*, (2015), **A71**, 3-8.

Rigaku Oxford Diffraction, (2015), CrysAlisPro Software system, version 1.171.39.20a,

Rigaku Corporation, Oxford, UK.

## References:

1. Sørensen, A.; Rasmussen, B.; Agarwal, S.; Schau-Magnussen, M.; Sølling, T. I.; Pittelkow, M., *Angew. Chem. Int. Ed.* **2013**, *52* (47), 12346-12349.
2. Yang, X.; Wang, Q.; Tao, Y.; Xu, H., *J. Chem. Res. (S)* **2002**, (4), 160-161.
3. Chen, F.-J.; Liao, G.; Li, X.; Wu, J.; Shi, B.-F., *Org. Lett.* **2014**, *16* (21), 5644-5647.
4. Goodgame, D. M. L.; Goodgame, M.; Rayner-Canham, G. W., *Inorg. Chim. Acta* **1969**, *3* (3), 406-410.
5. Graf von Roedern, E.; Lohof, E.; Hessler, G.; Hoffmann, M.; Kessler, H., *J. Am. Chem. Soc.* **1996**, *118* (42), 10156-10167.
6. Ormerod, D.; Willemsens, B.; Mermans, R.; Langens, J.; Winderickx, G.; Kalindjian, S. B.; Buck, I. M.; McDonald, I. M., *Org. Process. Res. Dev.* **2005**, *9* (4), 499-507.
7. Martignac, M.; Balayssac, S.; Gilard, V.; Benoit-Marquié, F., *Journal of Physical Chemistry A* **2015**, *119* (24), 6215-6222.
8. Han, L.; Wen, Y.; Li, R.; Xu, B.; Ge, Z.; Wang, X.; Cheng, T.; Cui, J.; Li, R., *Bioorg. Med. Chem.* **2017**, *25* (15), 4031-4044.
9. Zhu, Y.; Zhao, X.; Zhu, X.; Wu, G.; Li, Y.; Ma, Y.; Yuan, Y.; Yang, J.; Hu, Y.; Ai, L.; Gao, Q., *J. Med. Chem.* **2009**, *52* (14), 4192-4199.
10. Carpino, L. A.; El-Faham, A.; Albericio, F., *J. Org. Chem.* **1995**, *60* (11), 3561-3564.
11. Van Der Auwera, C.; van Damme, S.; Anteunis, M., *Int. J. Pept. Prot. Res.* **1987**, *29* (4), 464-471.

### Scans of <sup>1</sup>H and <sup>13</sup>C NMR of new compounds 6,6'-Diselanediylbis(3-nitrobenzoic acid) (I)

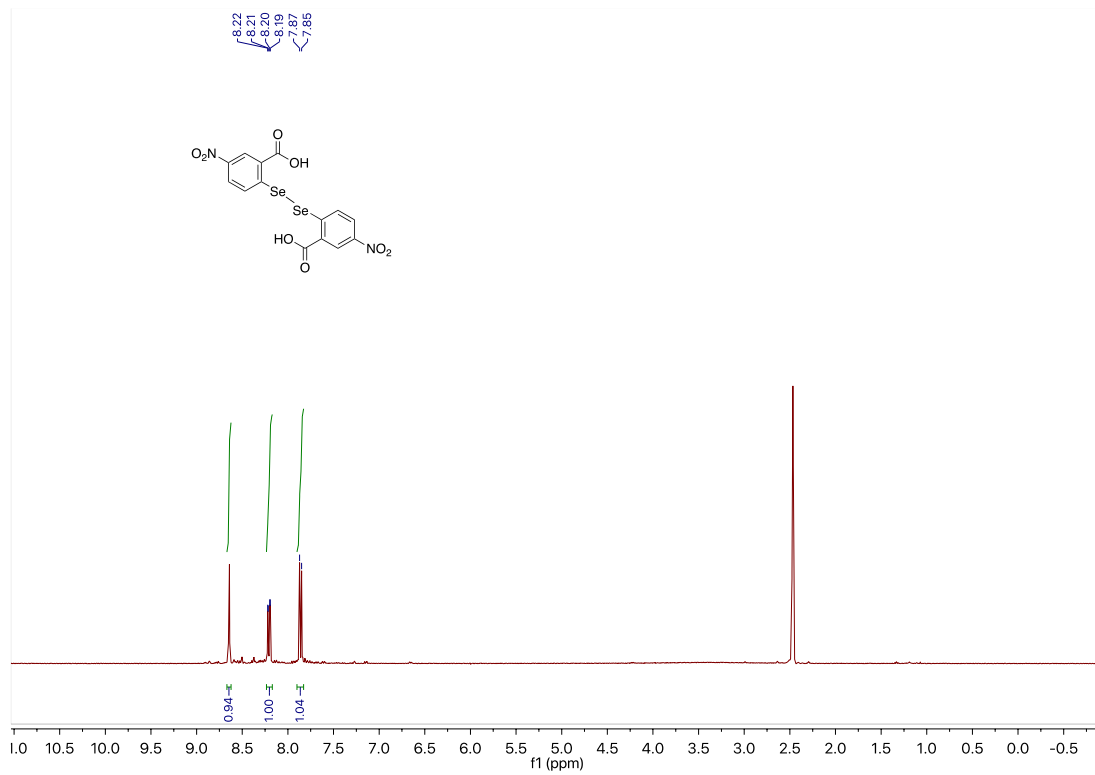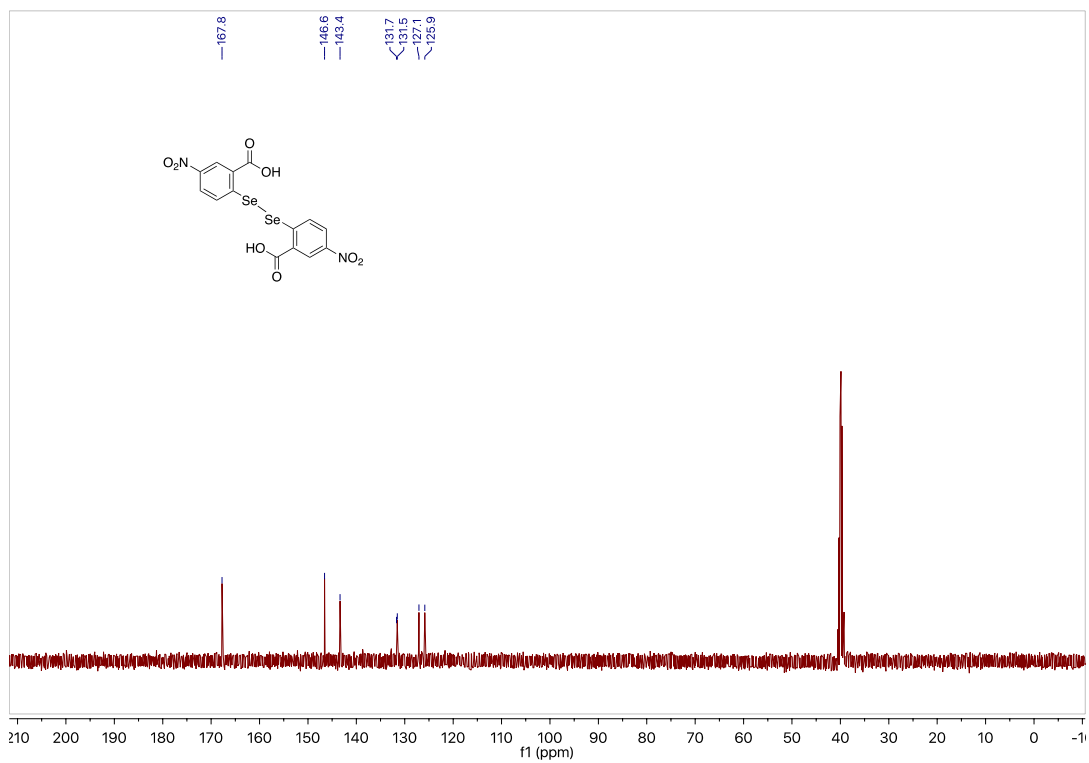

2-(2-(Dimethylamino)ethyl)-5-nitrobenzo[d][1,2]selenazol-3(2H)-one (4a)

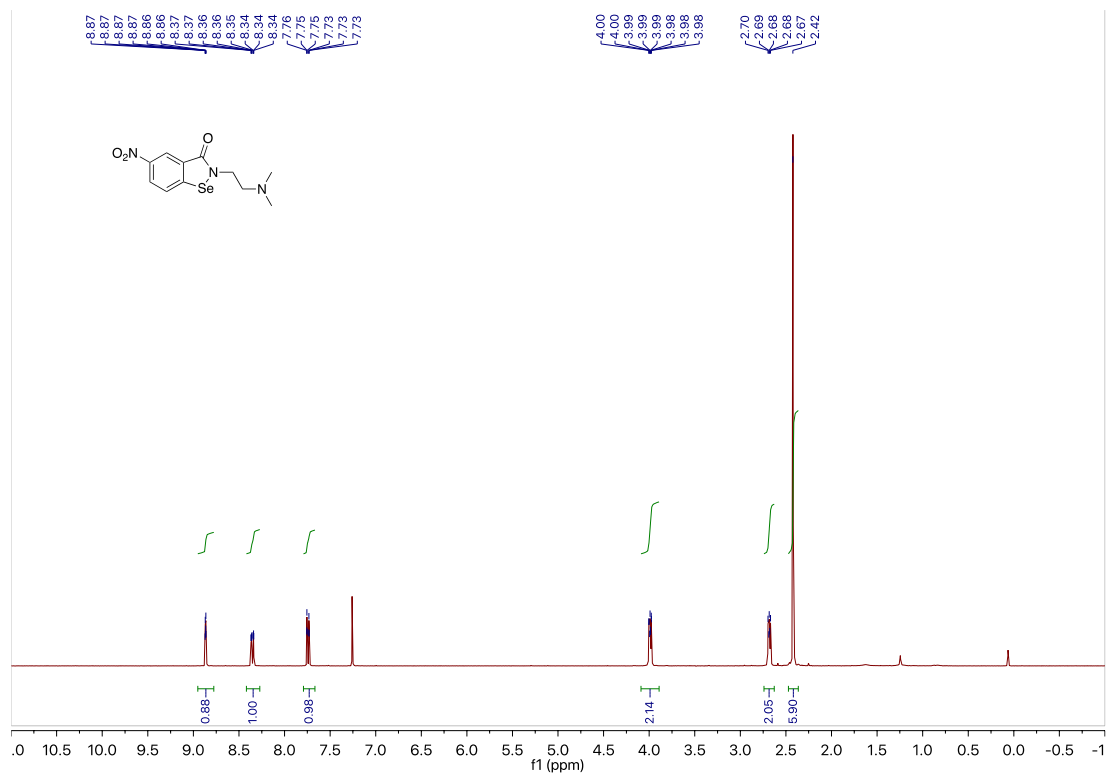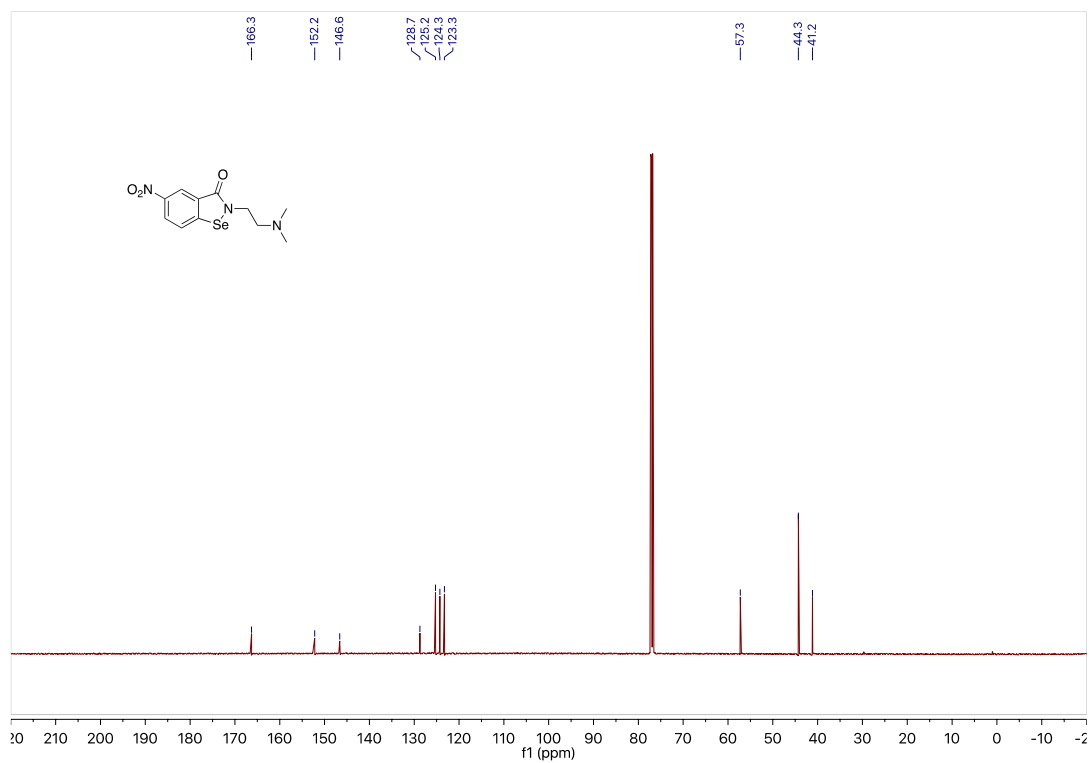

5-Nitro-2-(2-(pyridin-2-yl)propan-2-yl)benzo[d][1,2]selenazol-3(2*H*)-one (**4b**)

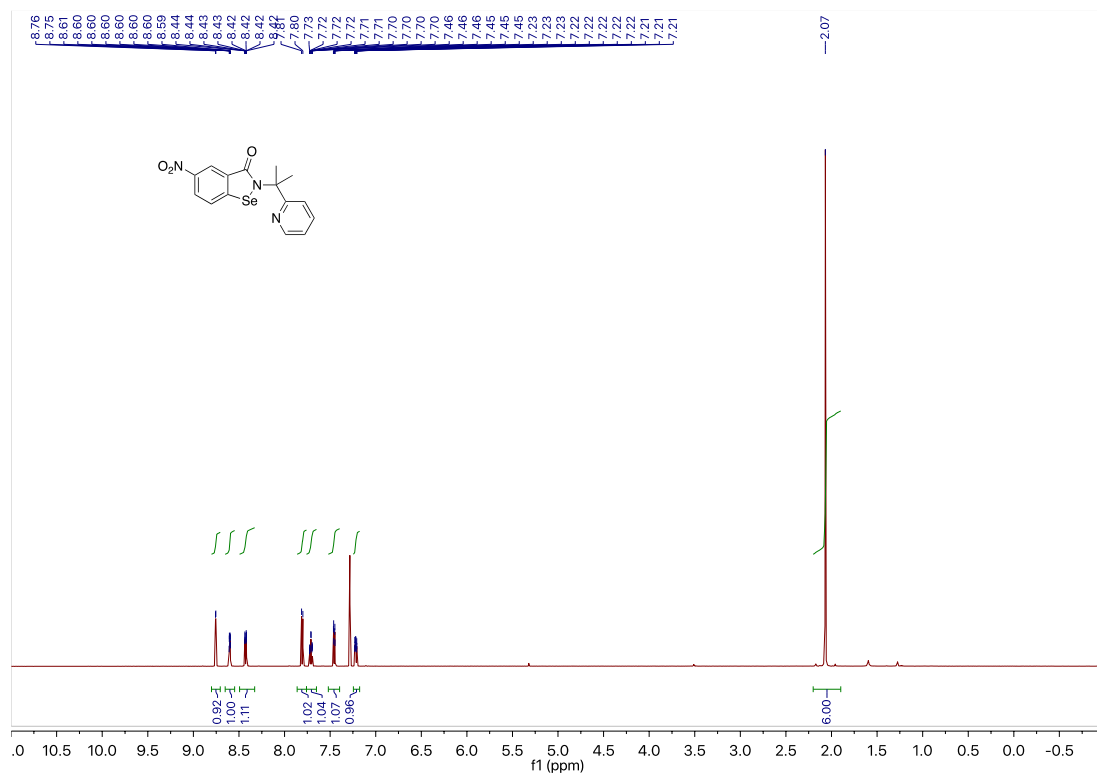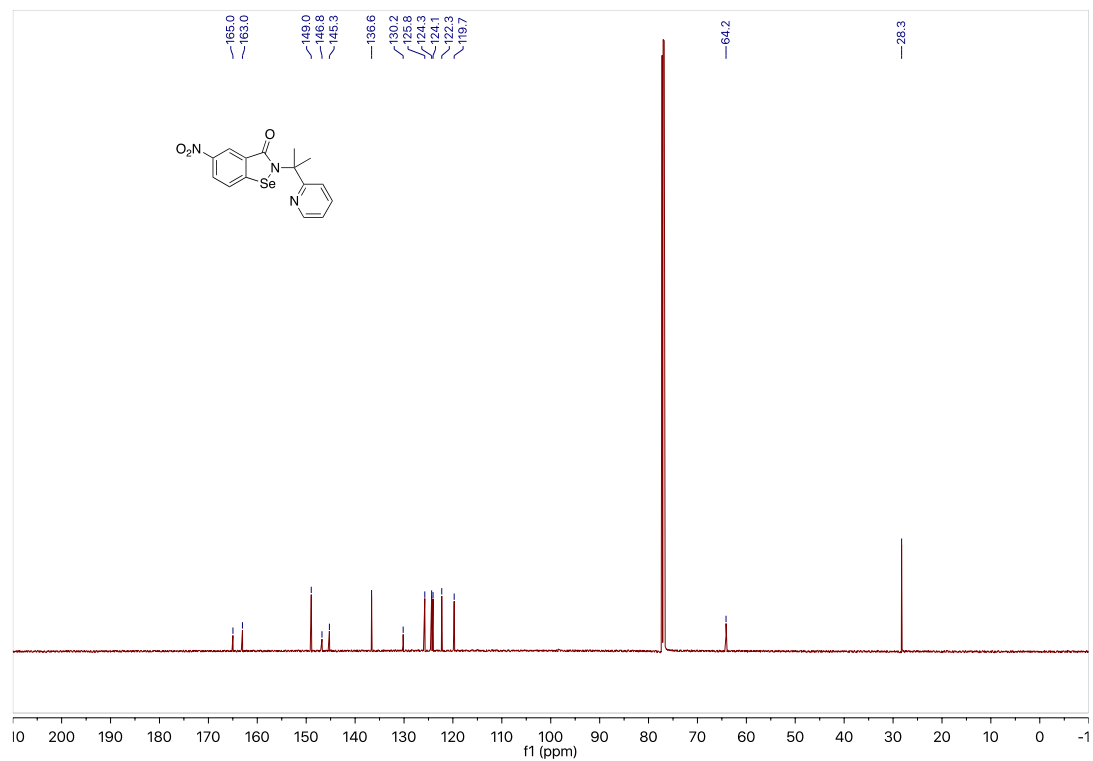

6,6'-Diselanediyldis(*N*-isopropyl-3-nitrobenzamide) (**6b**)

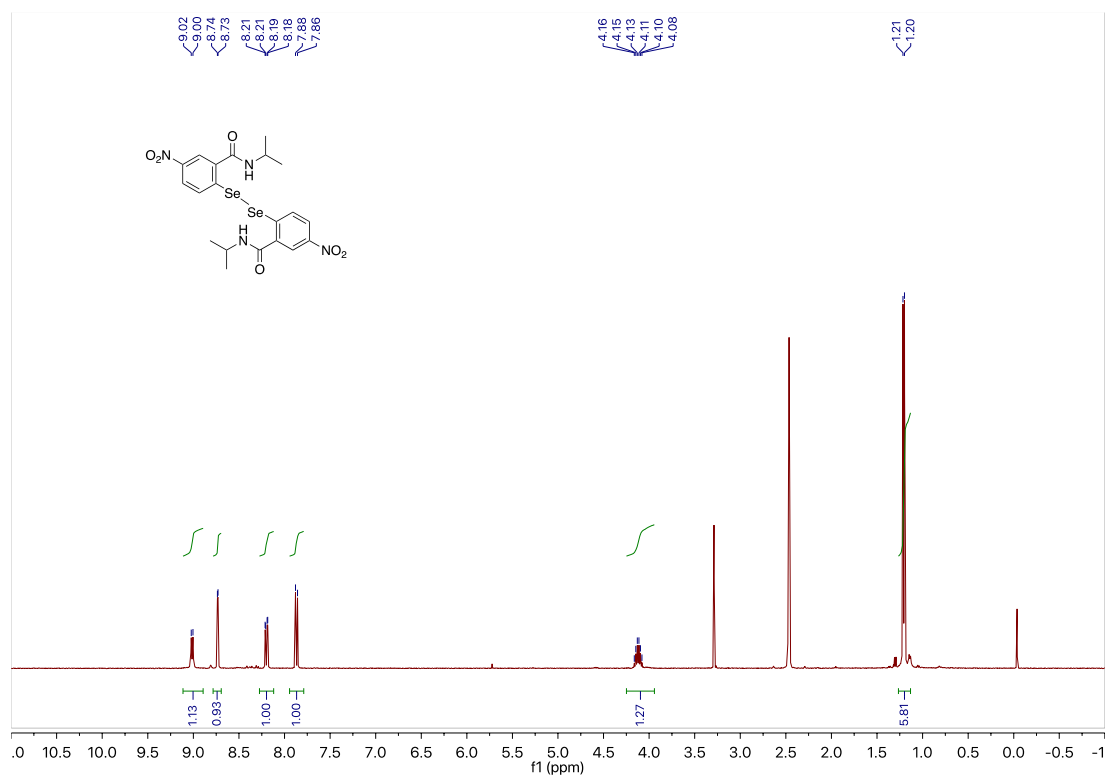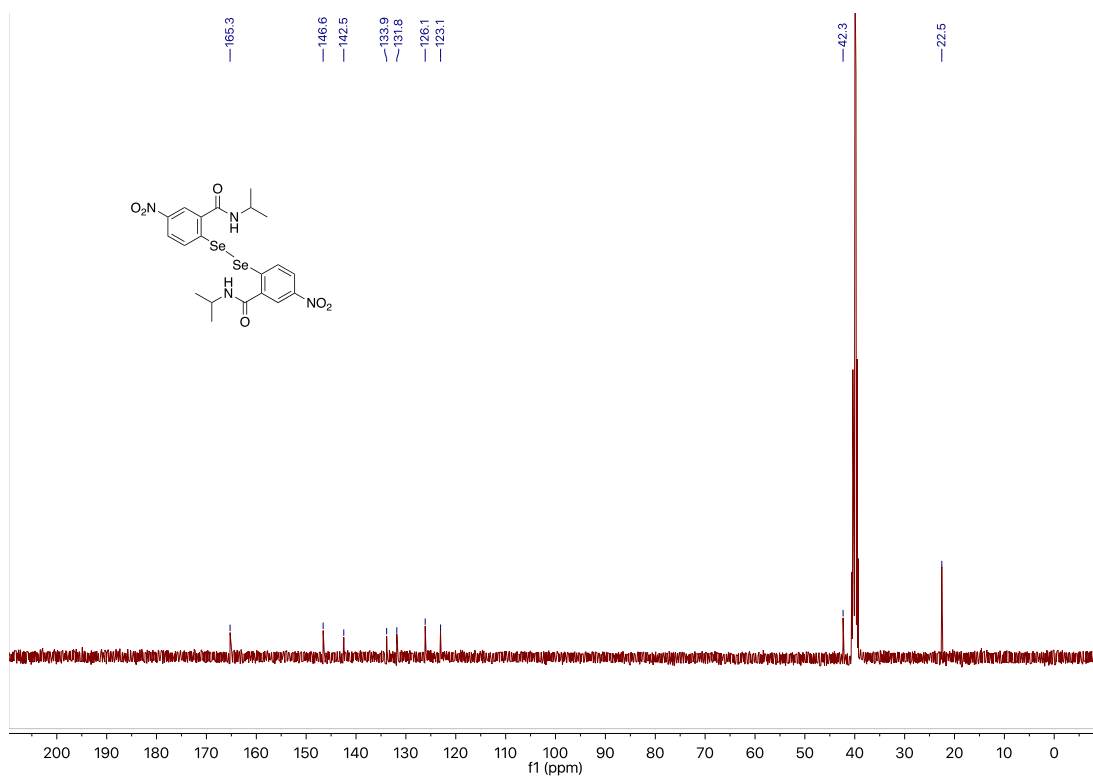

6,6'-Diselanediyldis(*N*-(3-(dimethylamino)propyl)-3-nitrobenzamide) (**6c**)

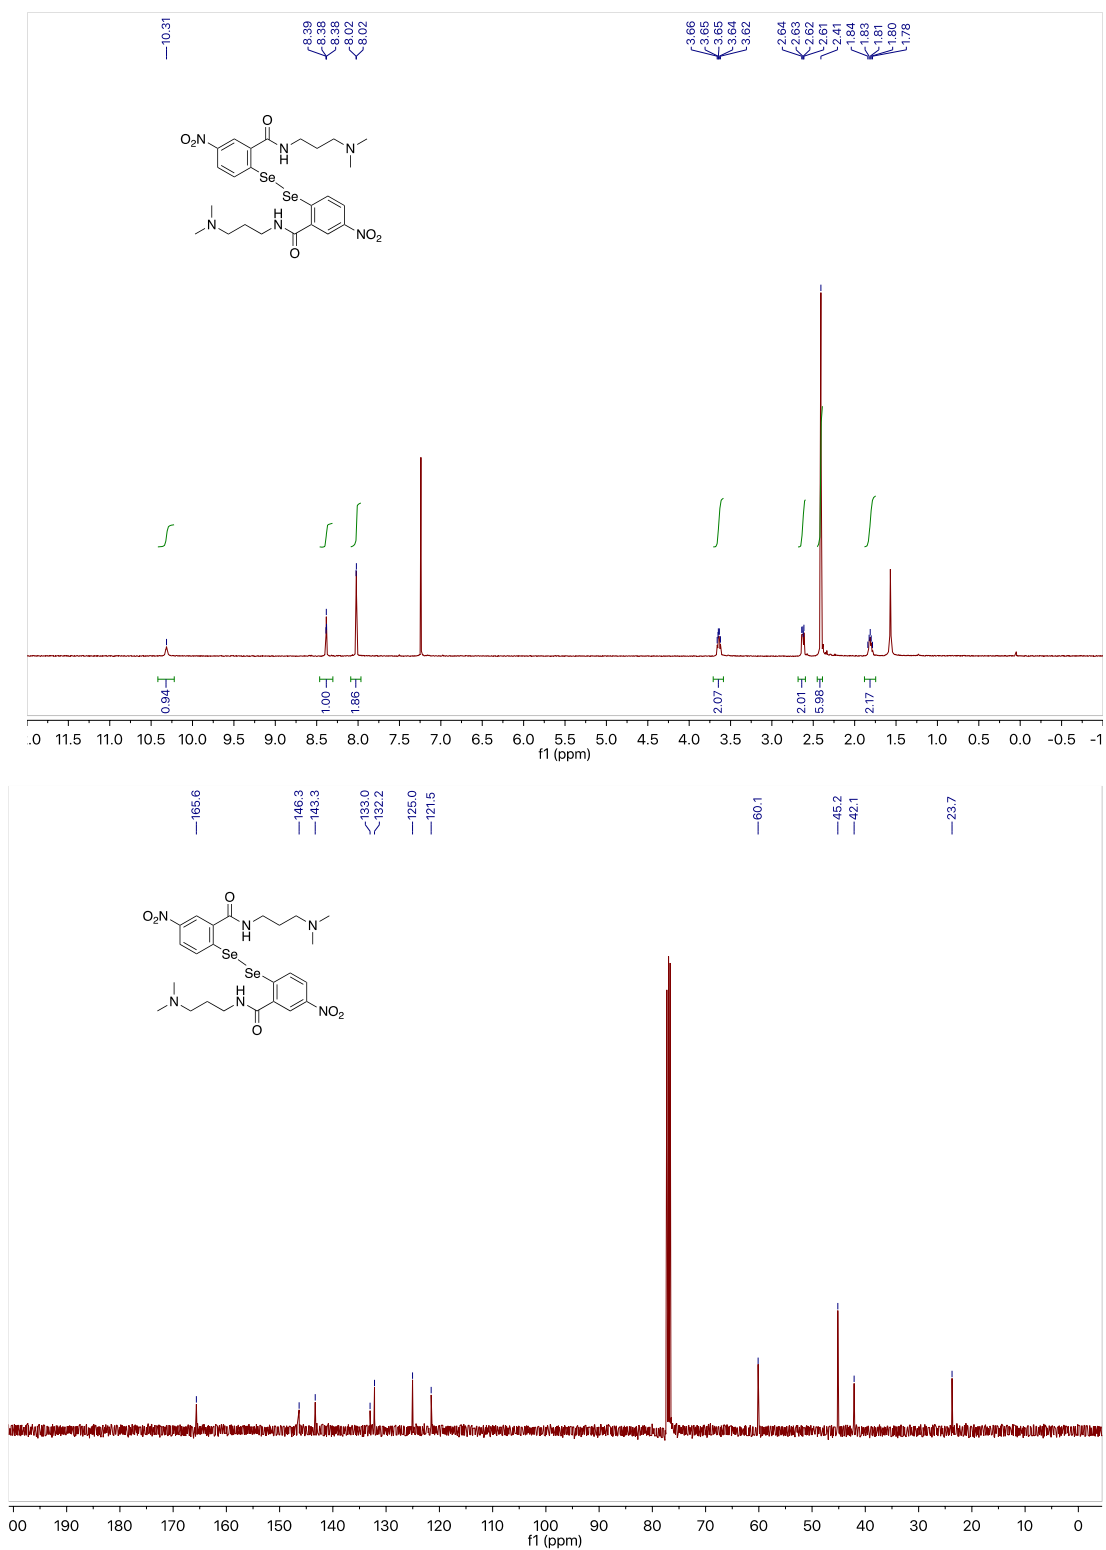



*N*<sup>1</sup>,*N*<sup>1'</sup>-((diselanediylobis(5-nitro-2,1-phenylene))bis(methylene))bis(*N*<sup>1</sup>,*N*<sup>2</sup>,*N*<sup>2</sup>-trimethylethane-1,2-diamine) (**6d**)

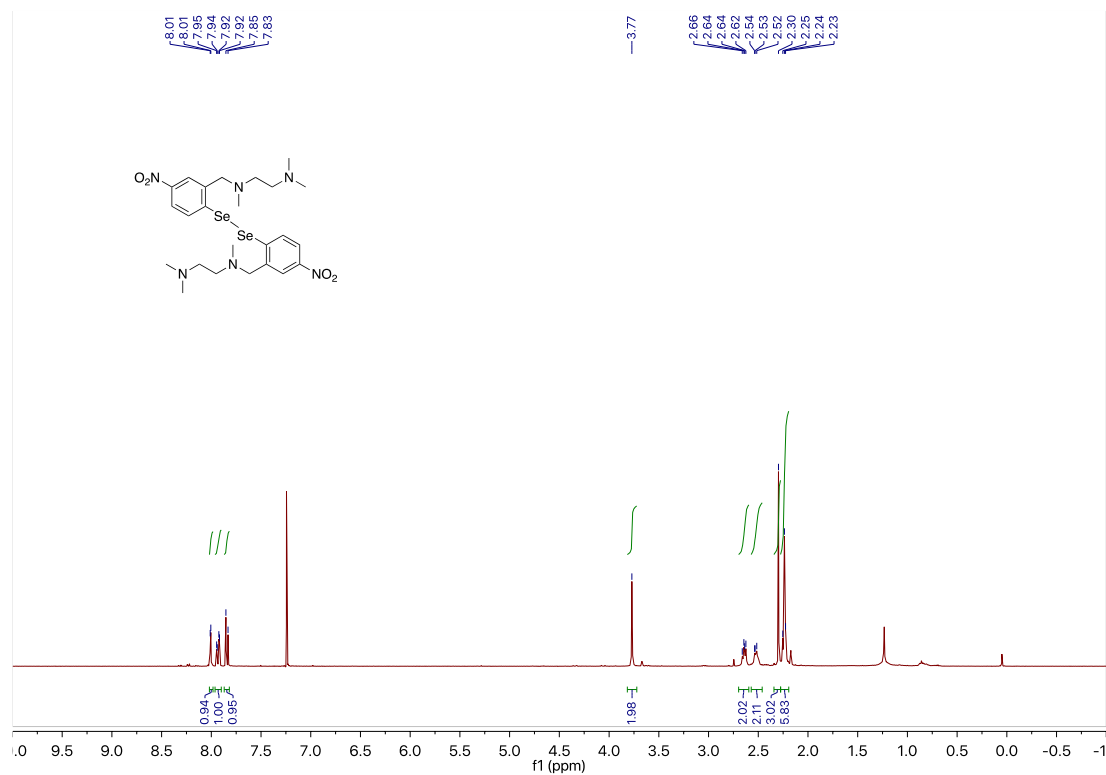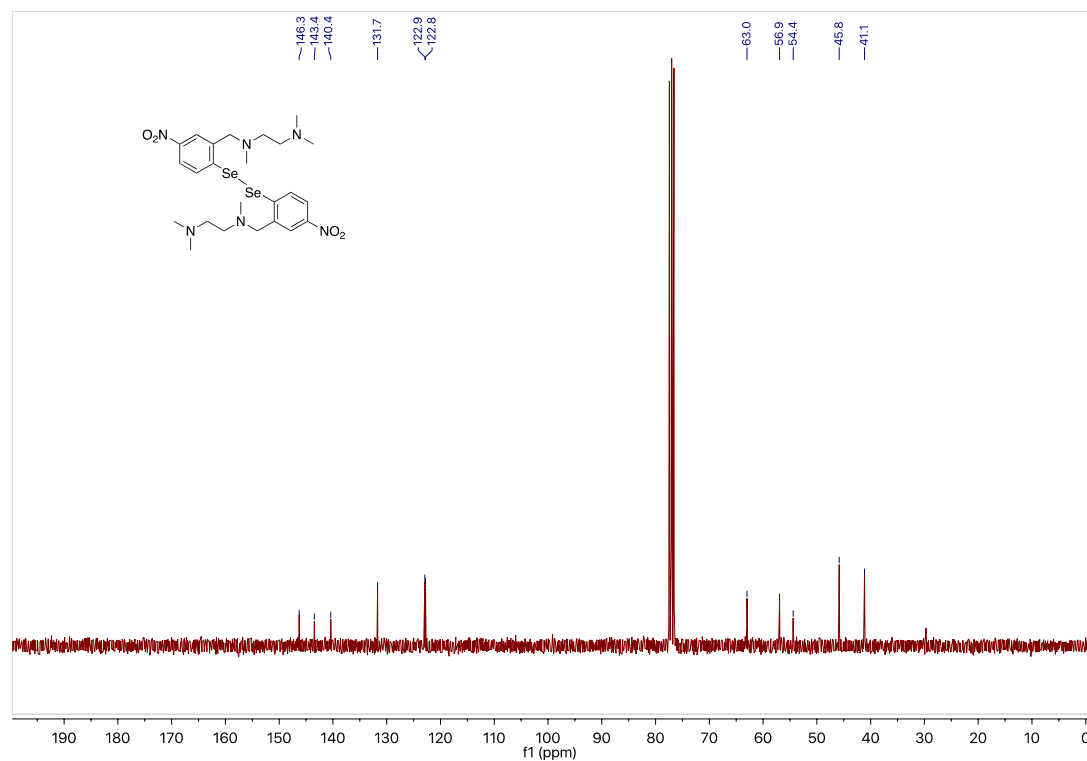

2,2'-Diselanediyibis(*N*-(2-(dimethylamino)ethyl)-*N*-methylnicotinamide) (6e)

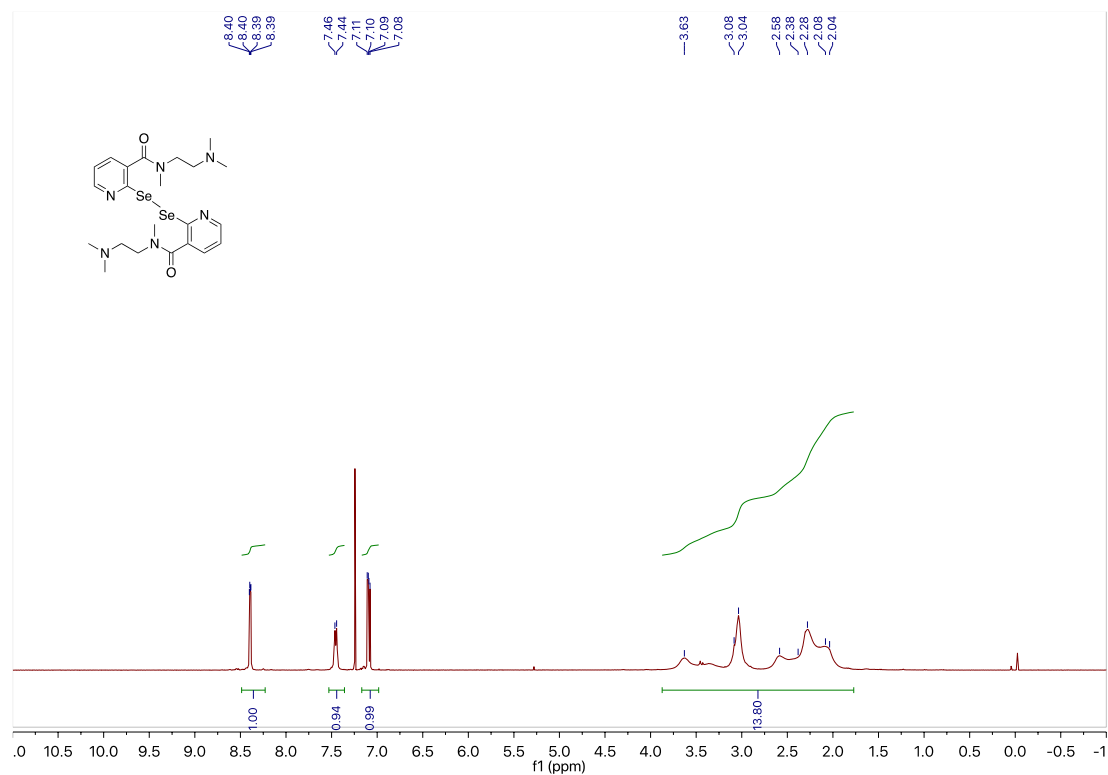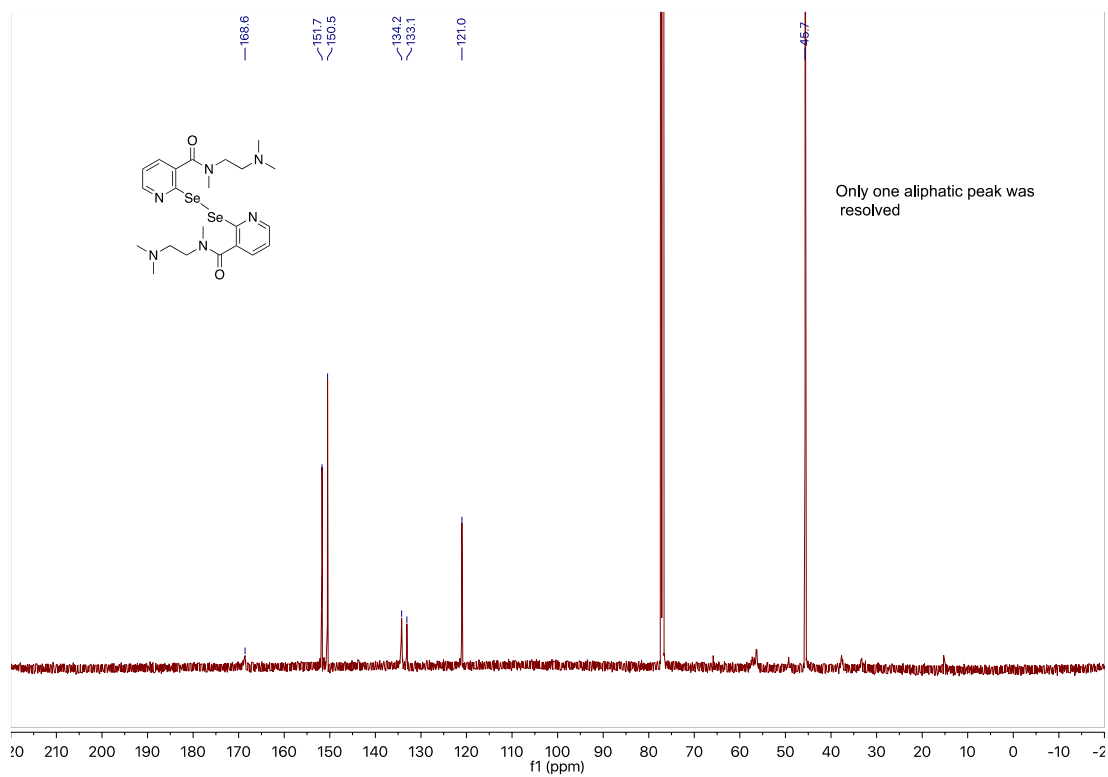

6,6'-diselanediylbis(3-nitro-*N*-(2-(pyridin-2-yl)propan-2-yl)benzamide) (6f)

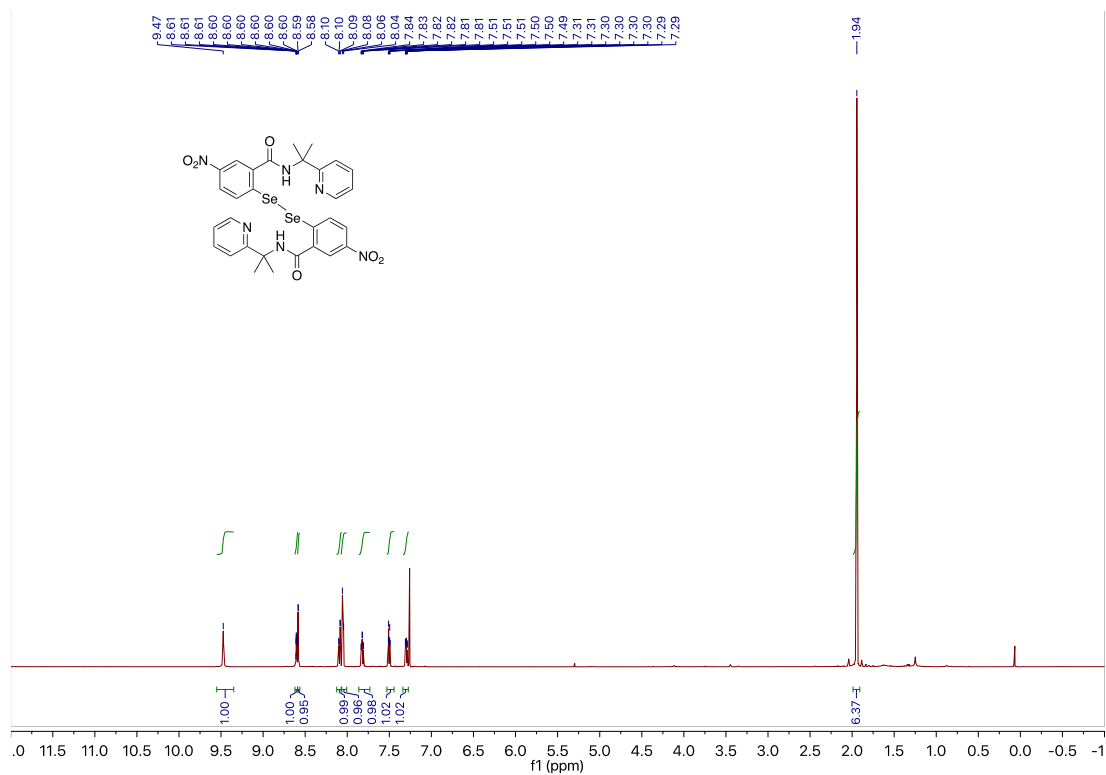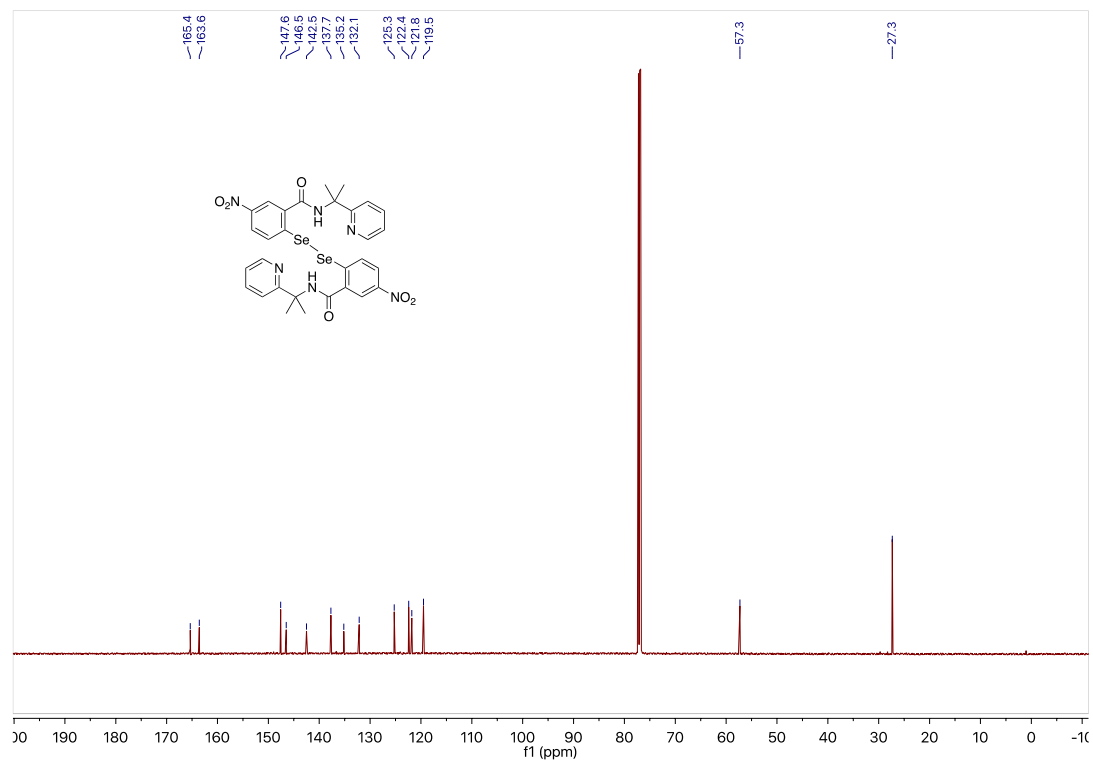

6,6'-Diselanediyldis(*N*-(2-(dimethylamino)ethyl)-3-nitrobenzamide) (**6g**)

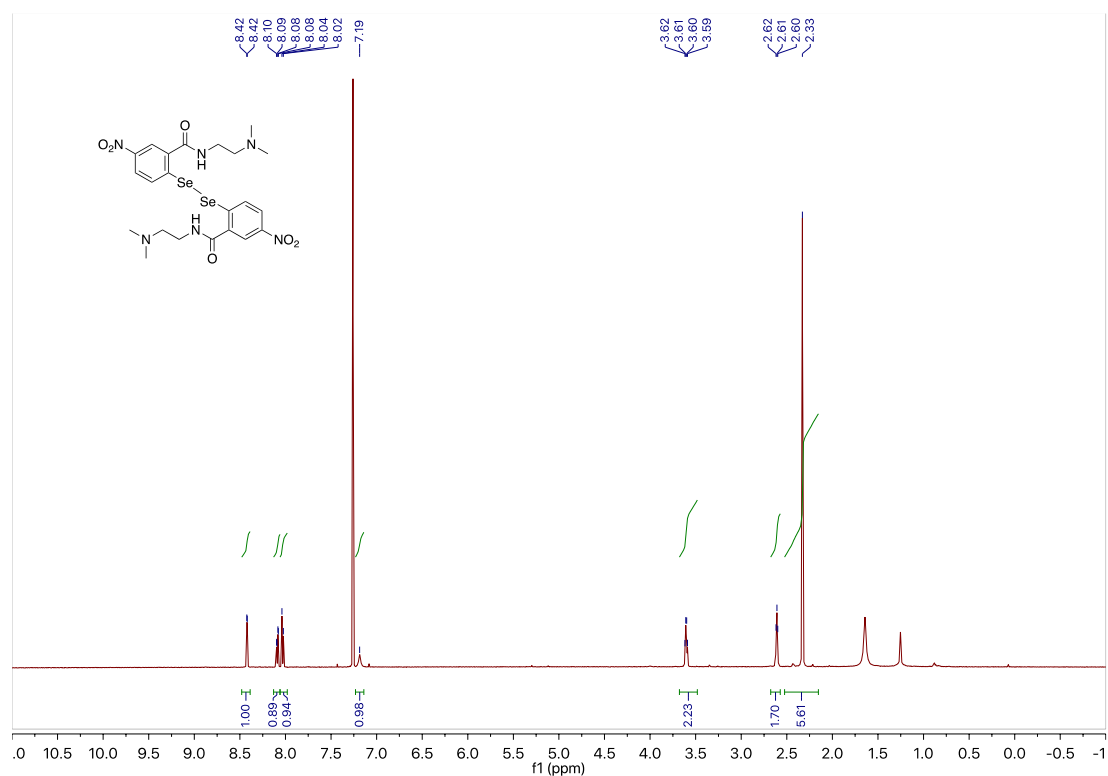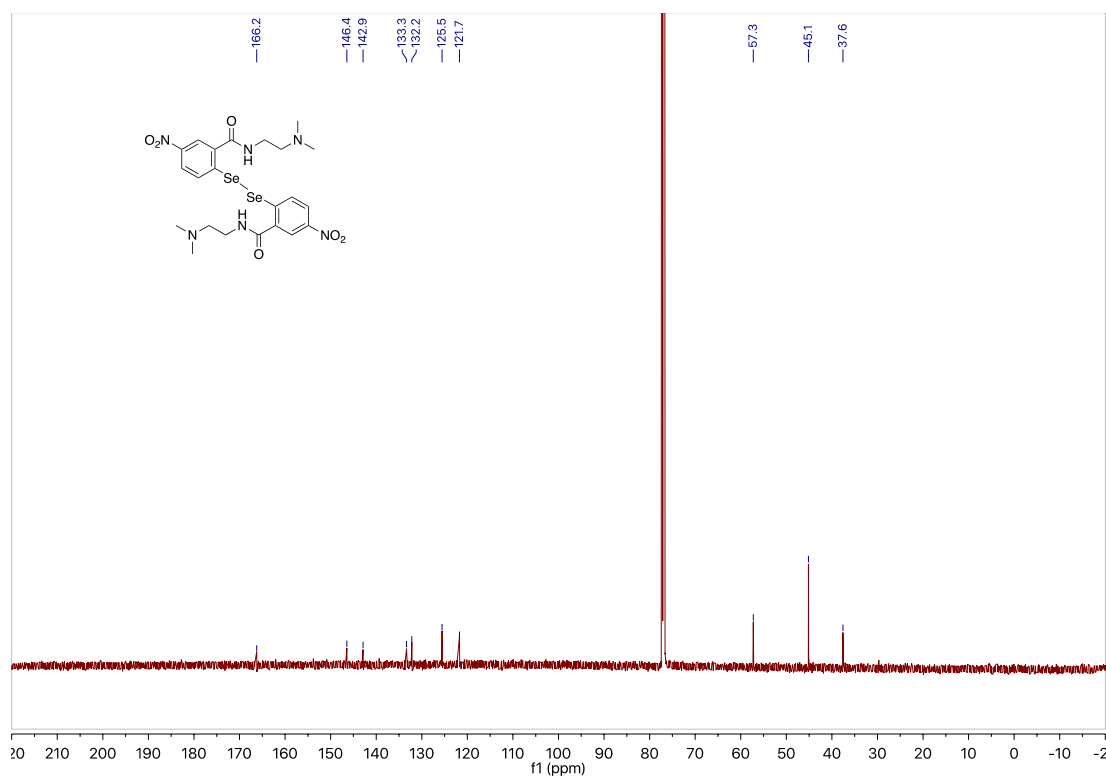

6,6'-Diselanediyldis(*N*-(2-(dimethylamino)ethyl)-*N*-methyl-3-nitrobenzamide) (6h)

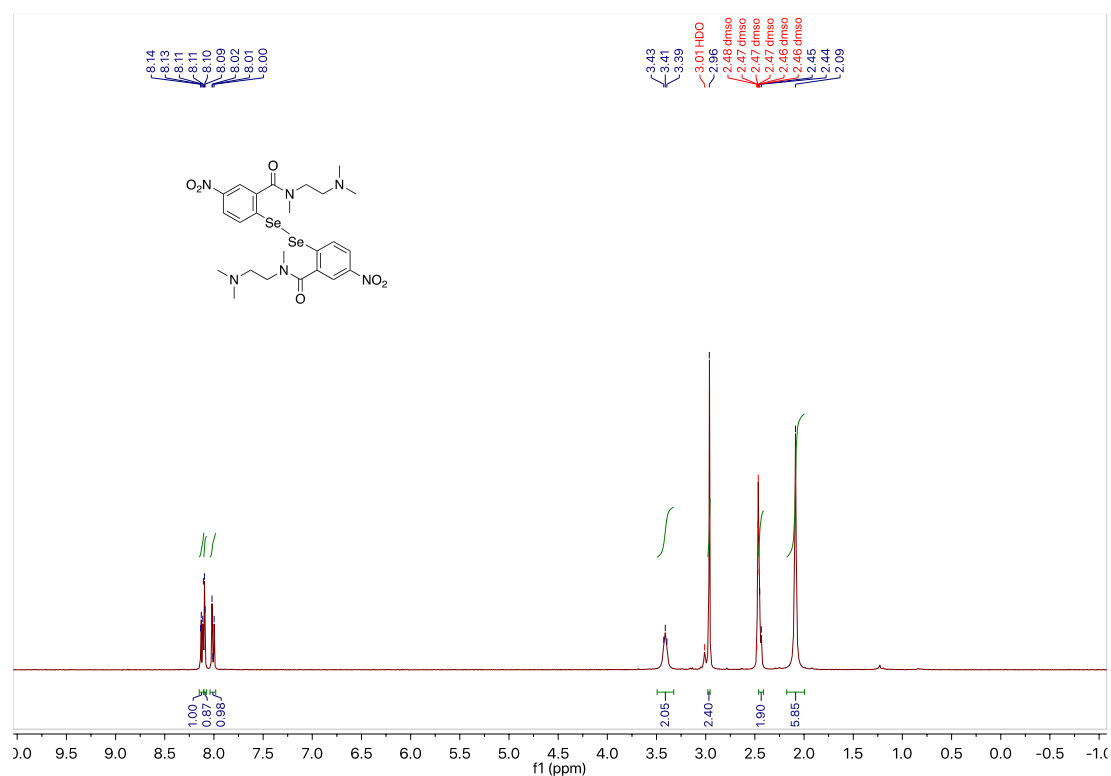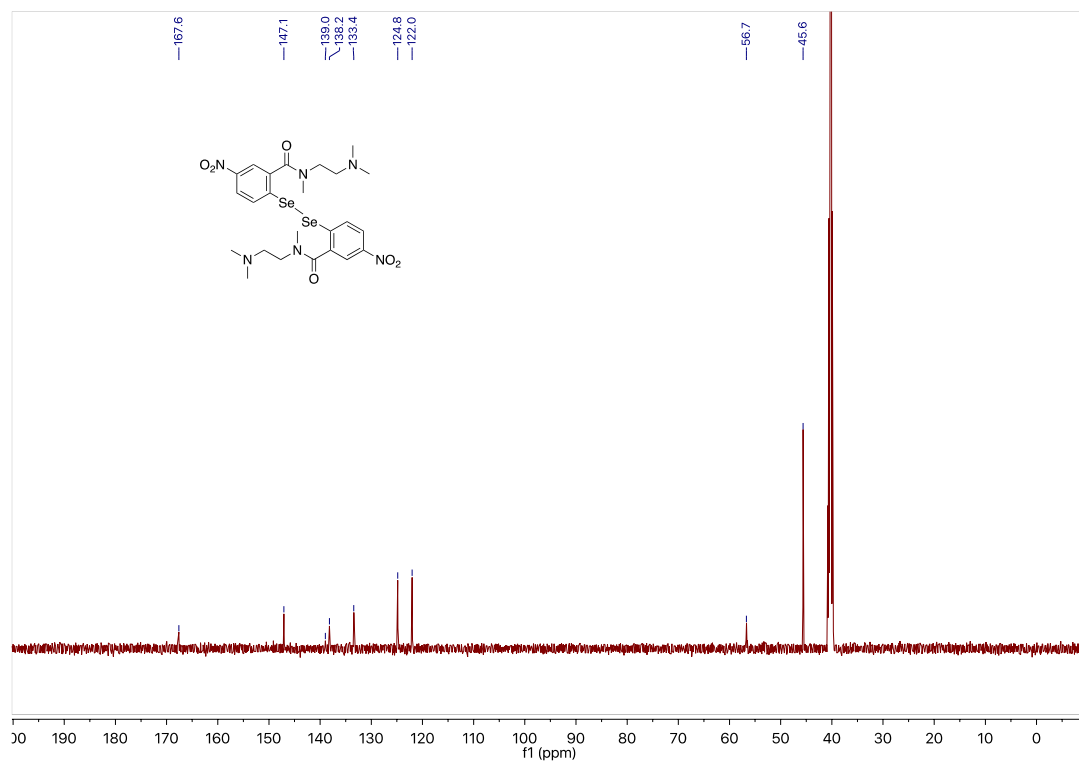

Methyl ((benzyloxy)carbonyl)-*L*-phenylalanyl-*D*-tryptophanate (Table 1, entry 1)

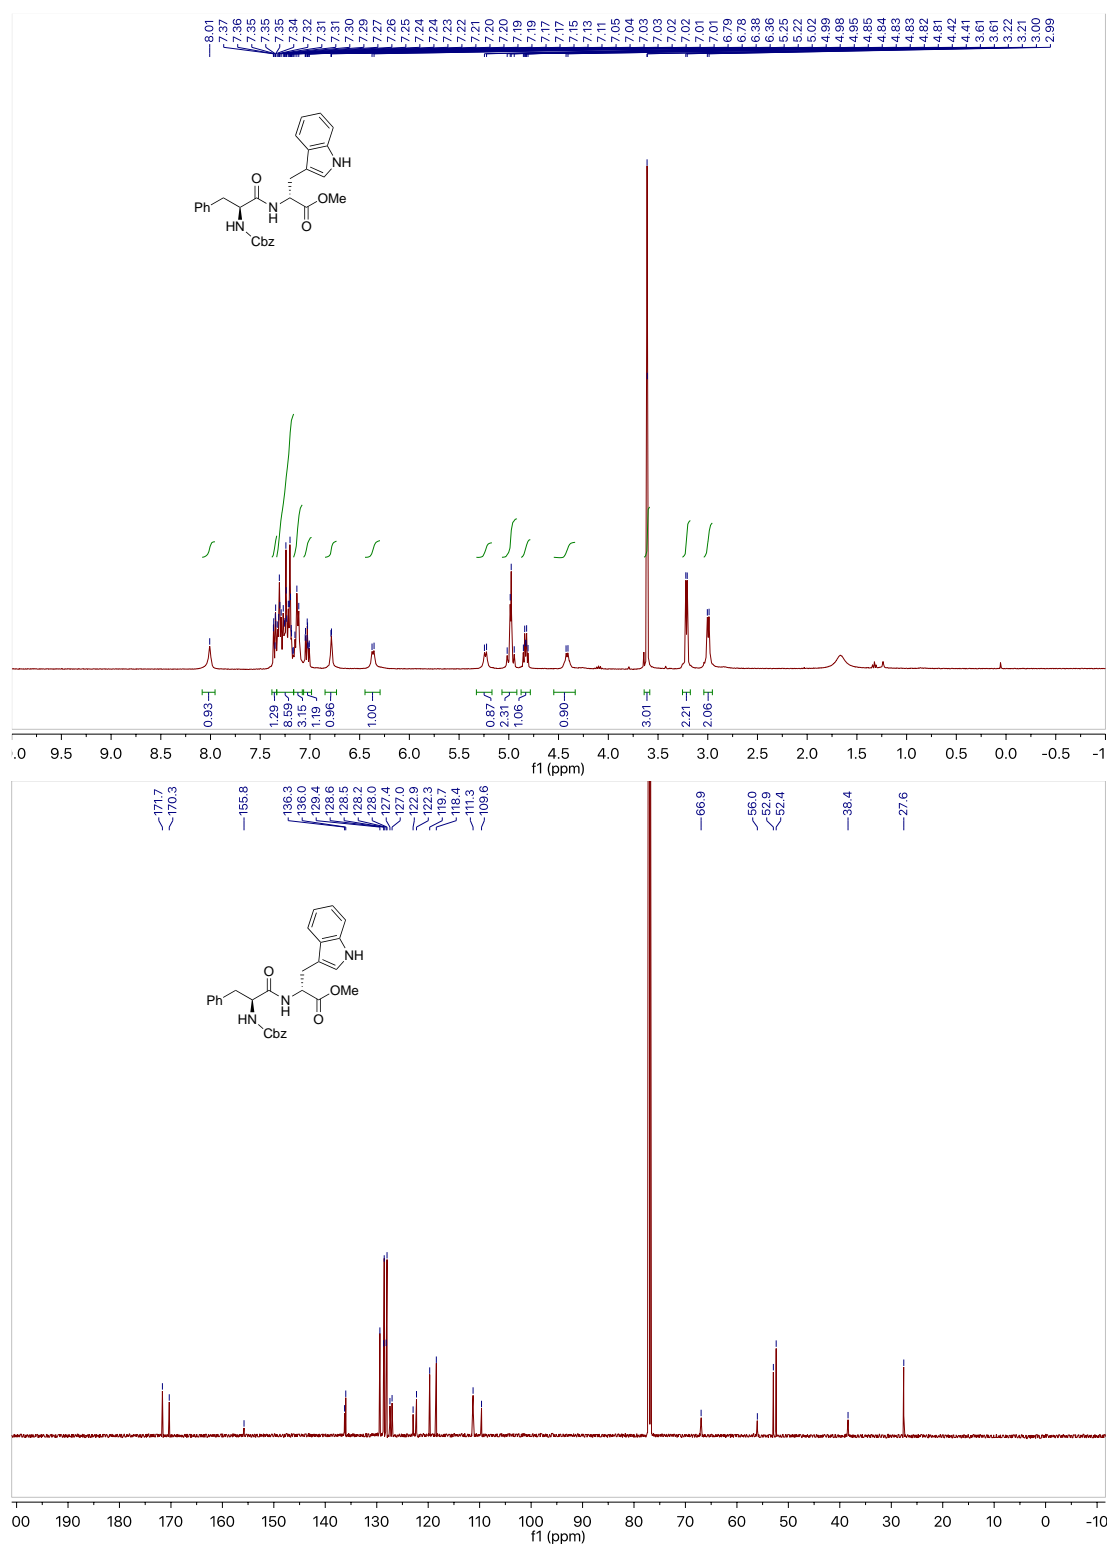

Methyl *N*<sup>2</sup>-(((9*H*-fluoren-9-yl)methoxy)carbonyl)-*N*<sup>6</sup>-(*tert*-butoxycarbonyl)-*L*-lysyl-*L*-threoninate  
(Table 1, entry 2)

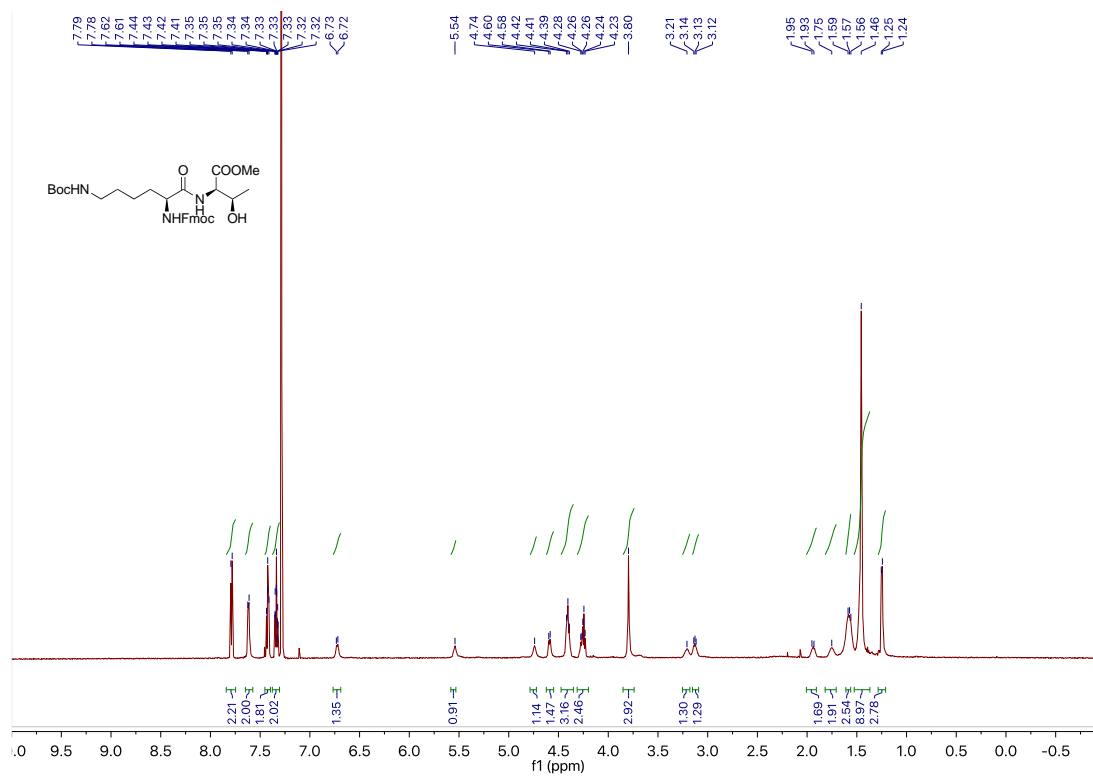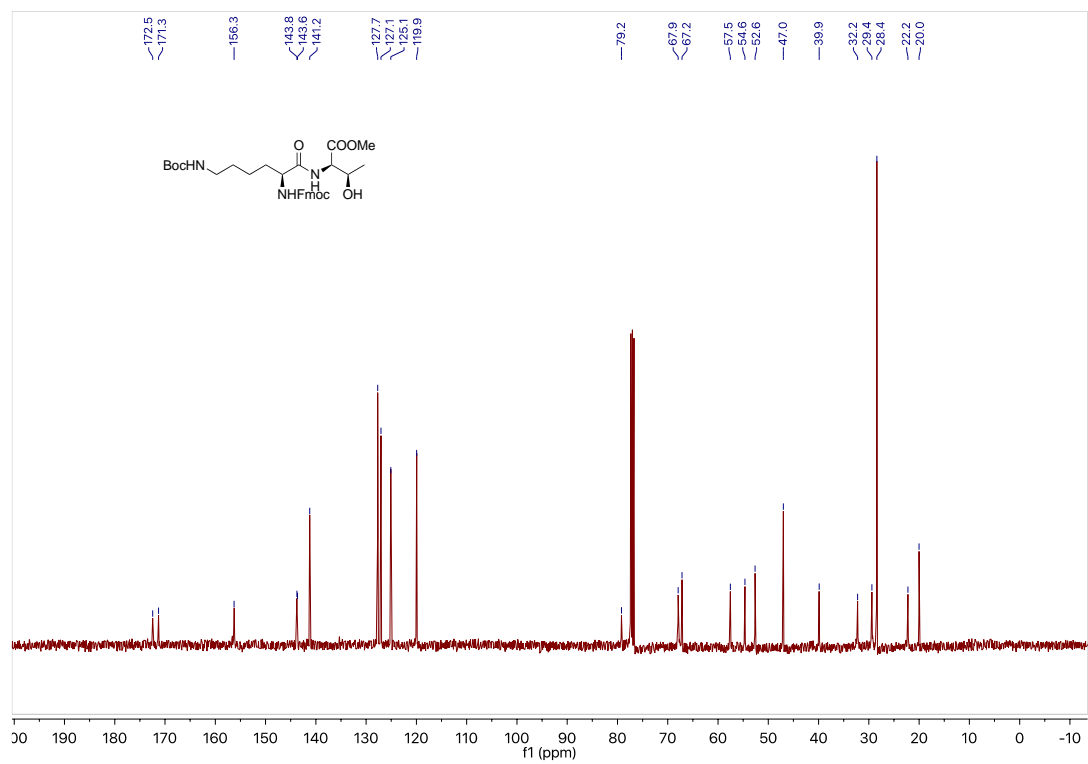

5-((3*aS*,4*S*,6*aR*)-2-Oxohexahydro-1*H*-thieno[3,4-*d*]imidazol-4-yl)-*N*-(2-phenylpropan-2-yl)pentanamide (Table 1, entry 3)

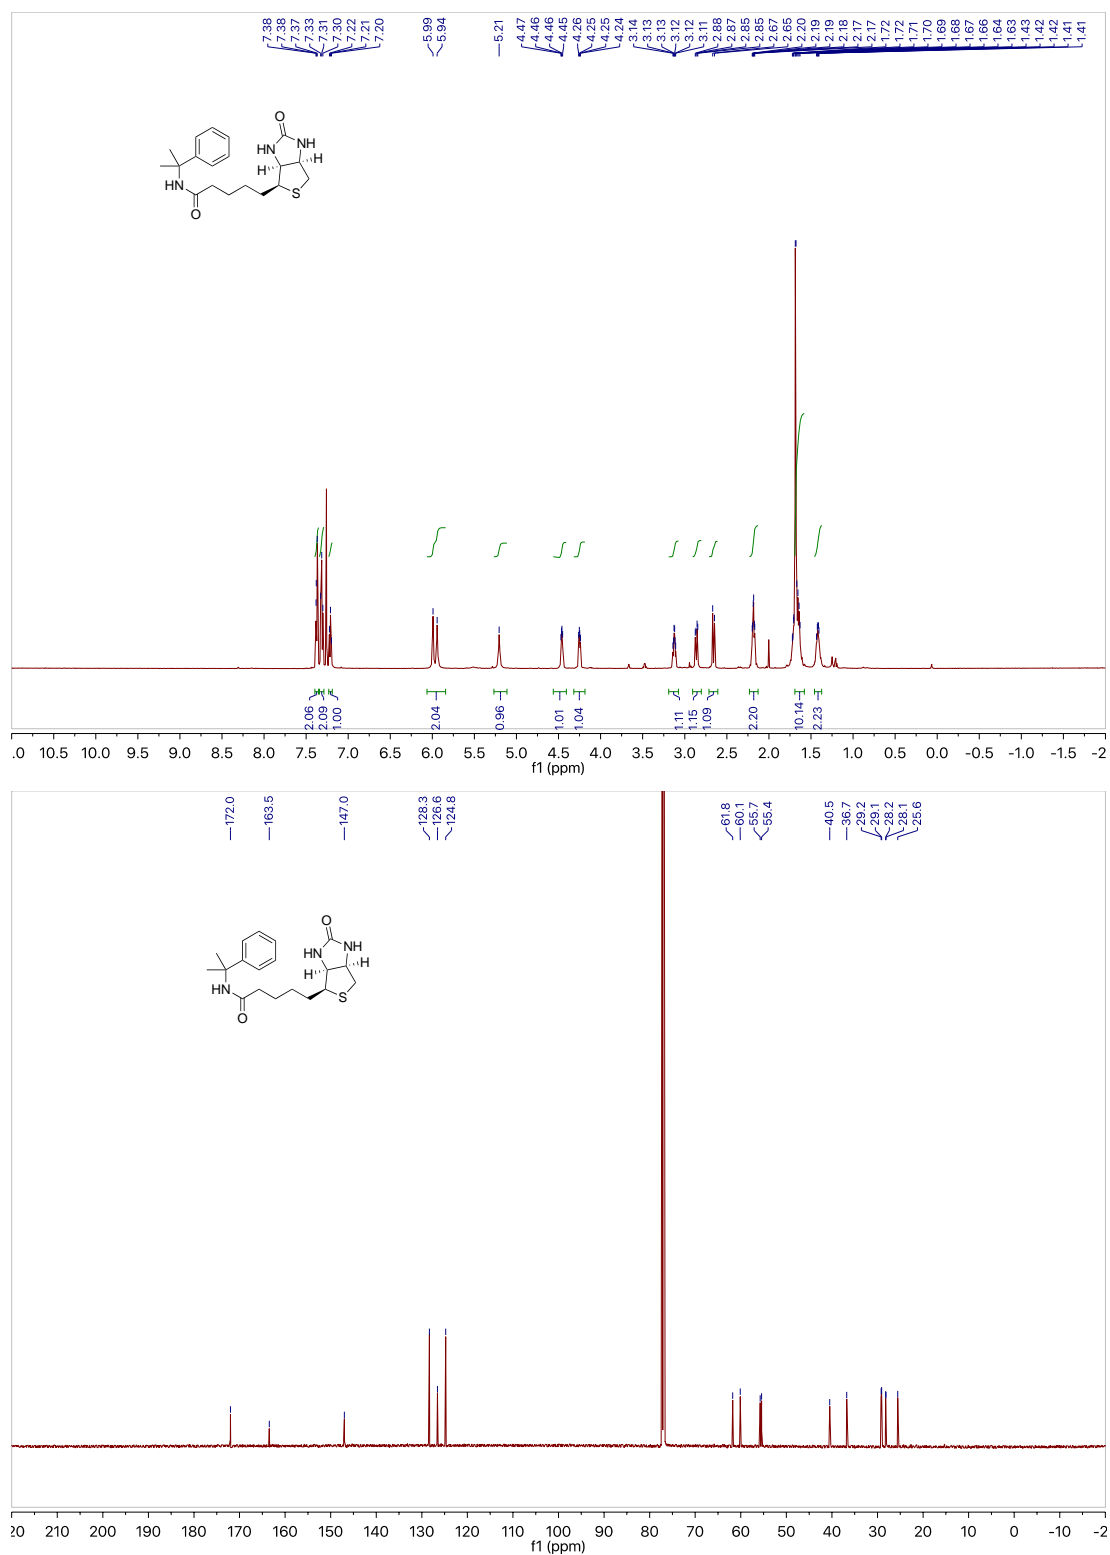



Dibenzyl (S)-5-(2-((*tert*-butoxycarbonyl)amino)-3-(2-fluorophenyl)propanamido)isophthalate  
 (Table 1, entry 4)

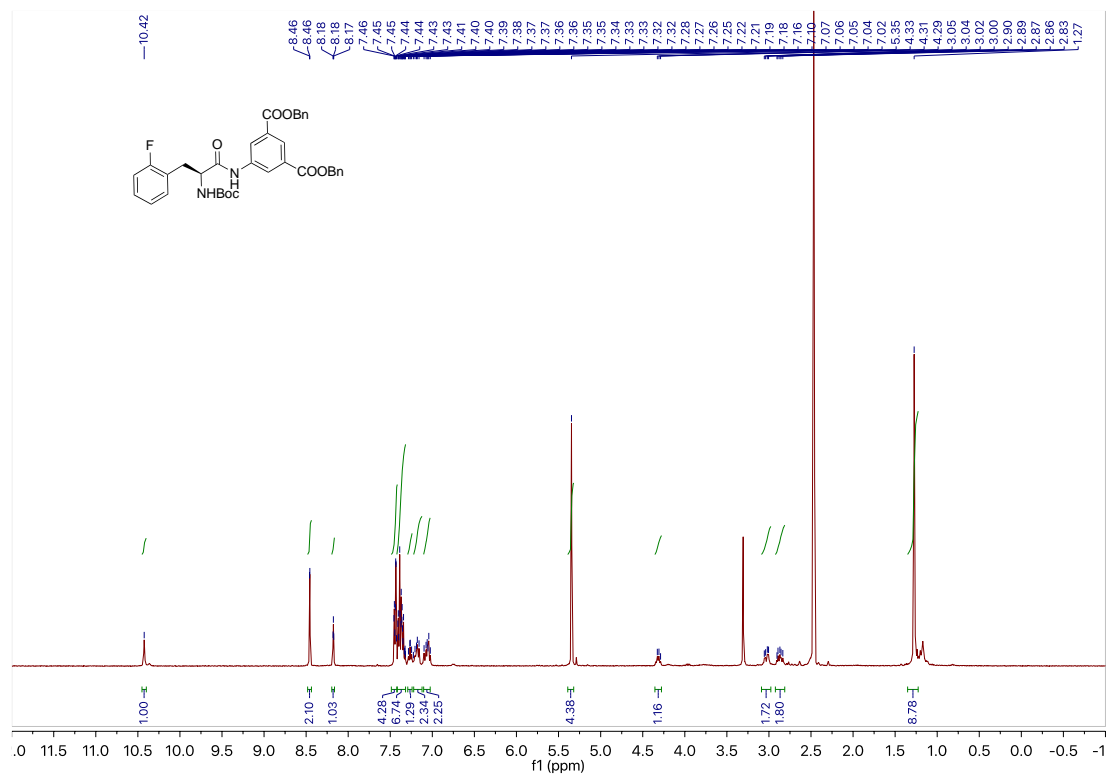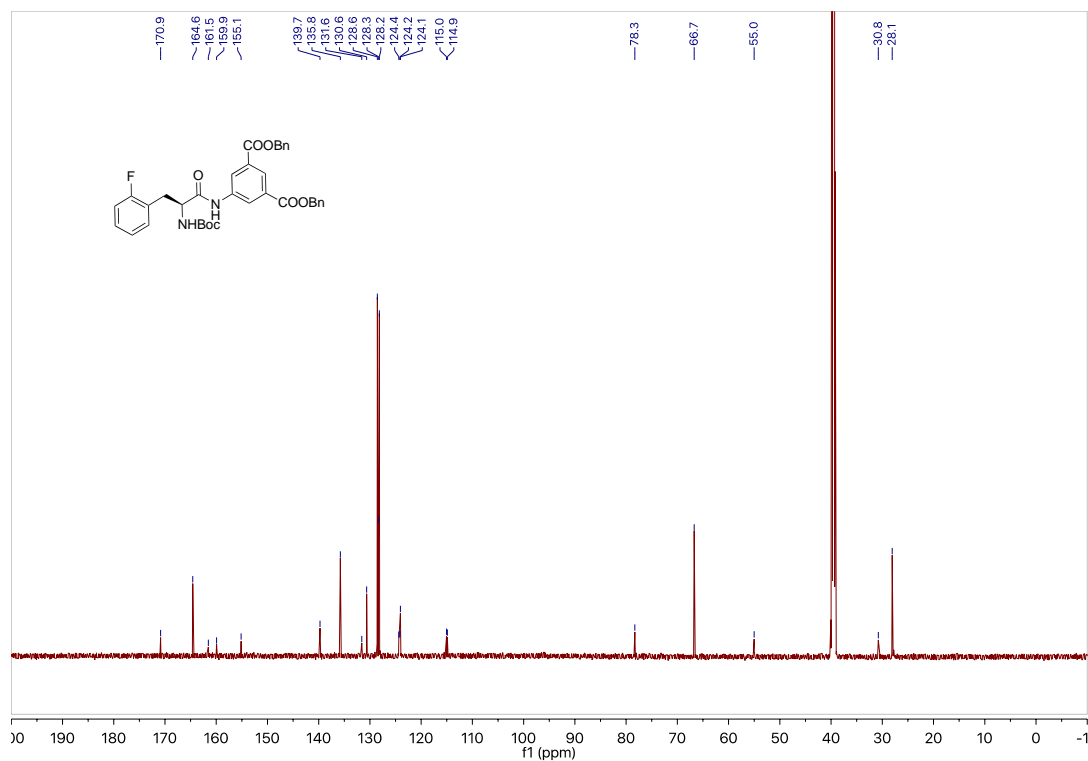

(S)-N-(1-(Isopentylamino)-1-oxo-3-phenylpropan-2-yl)pyrazine-2-carboxamide (Table 1, entry 5)

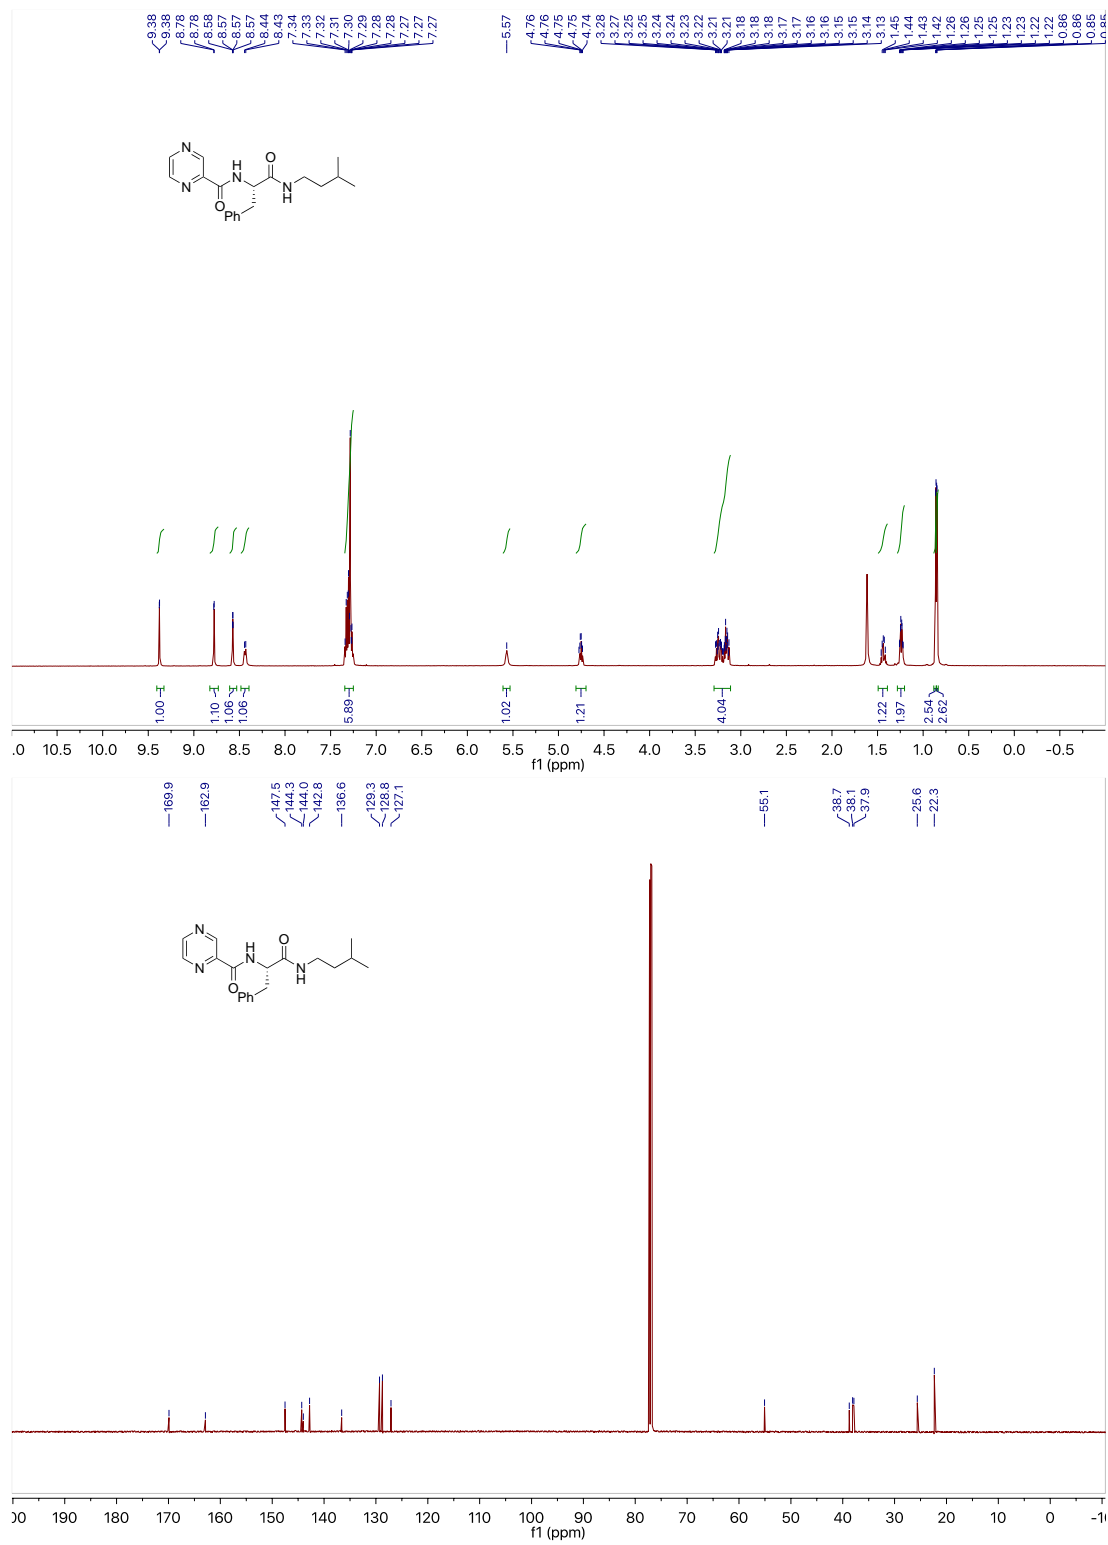

(S)-2-((1-((2R,4S,5R)-4-Hydroxy-5-(hydroxymethyl)tetrahydrofuran-2-yl)-2-oxo-1,2-dihydropyrimidin-4-yl)amino)-2-oxo-1-phenylethyl acetate (Table 1, entry 6)

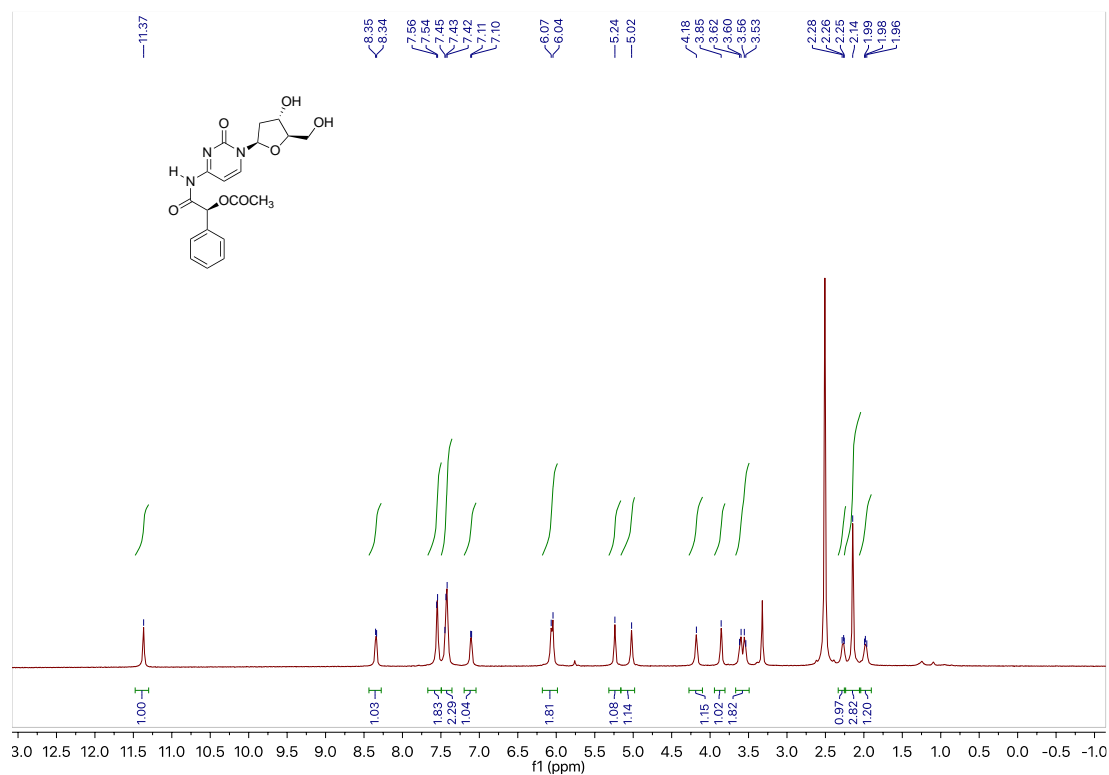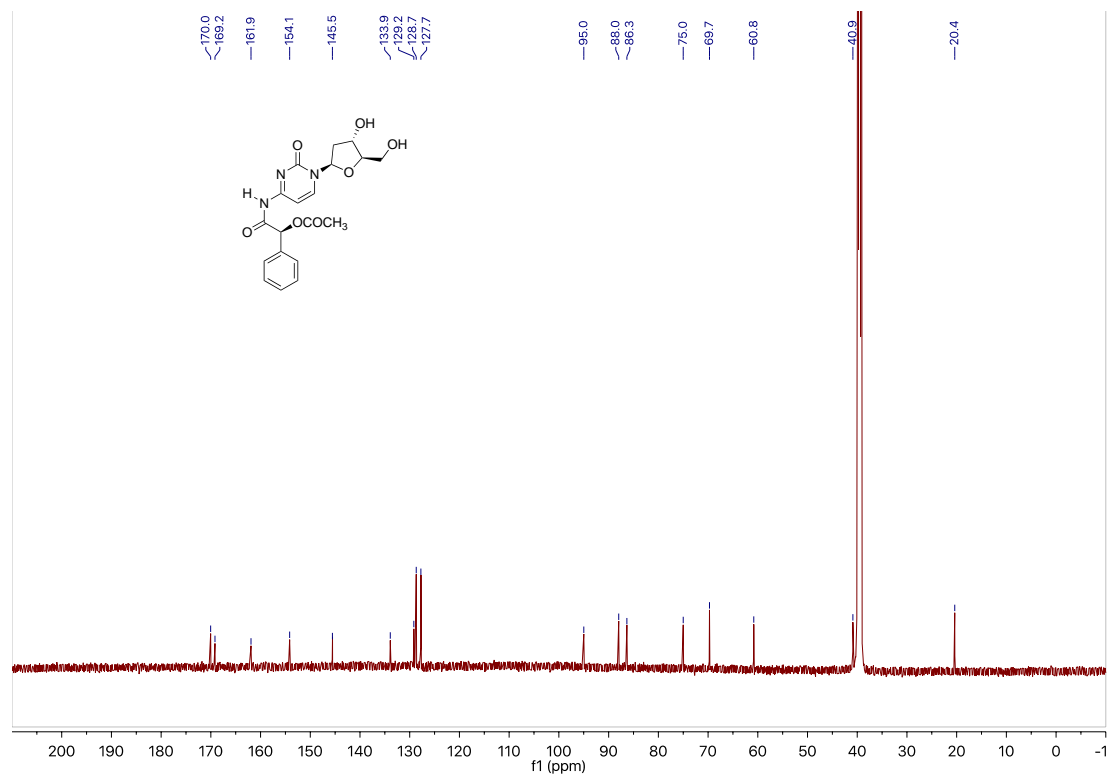

Methyl (*tert*-butoxycarbonyl)-*D*-tryptophyl-*L*-leucinate (Table 1, entry 7)

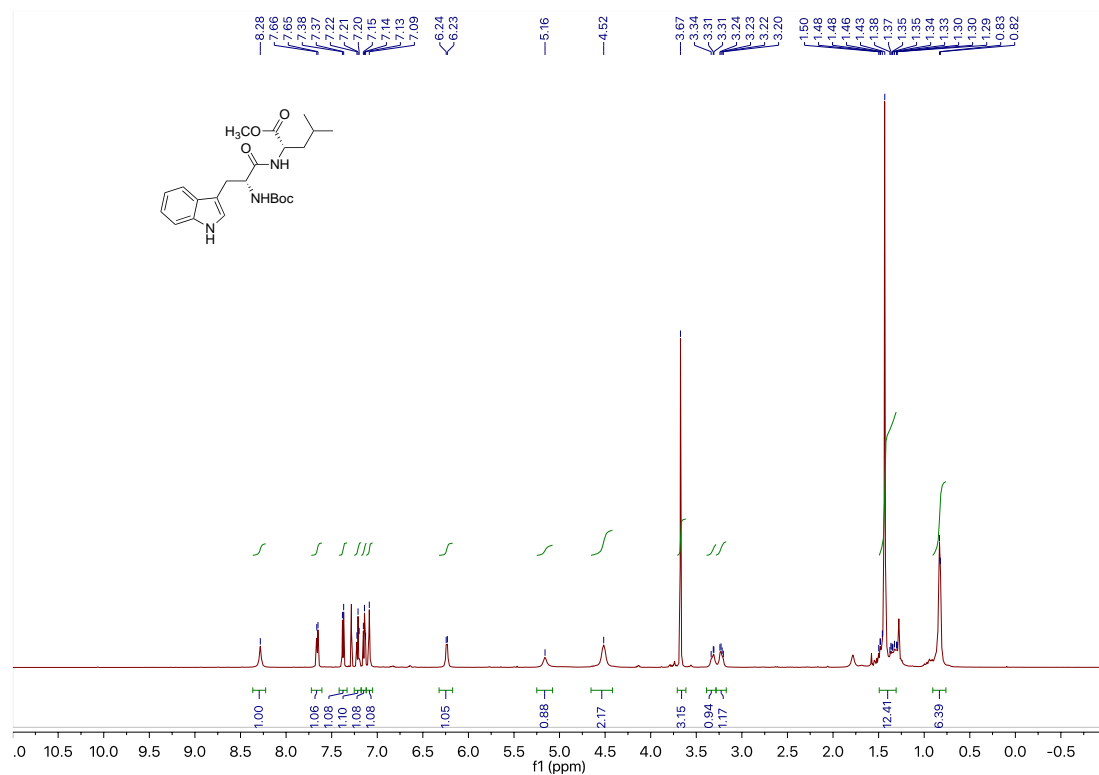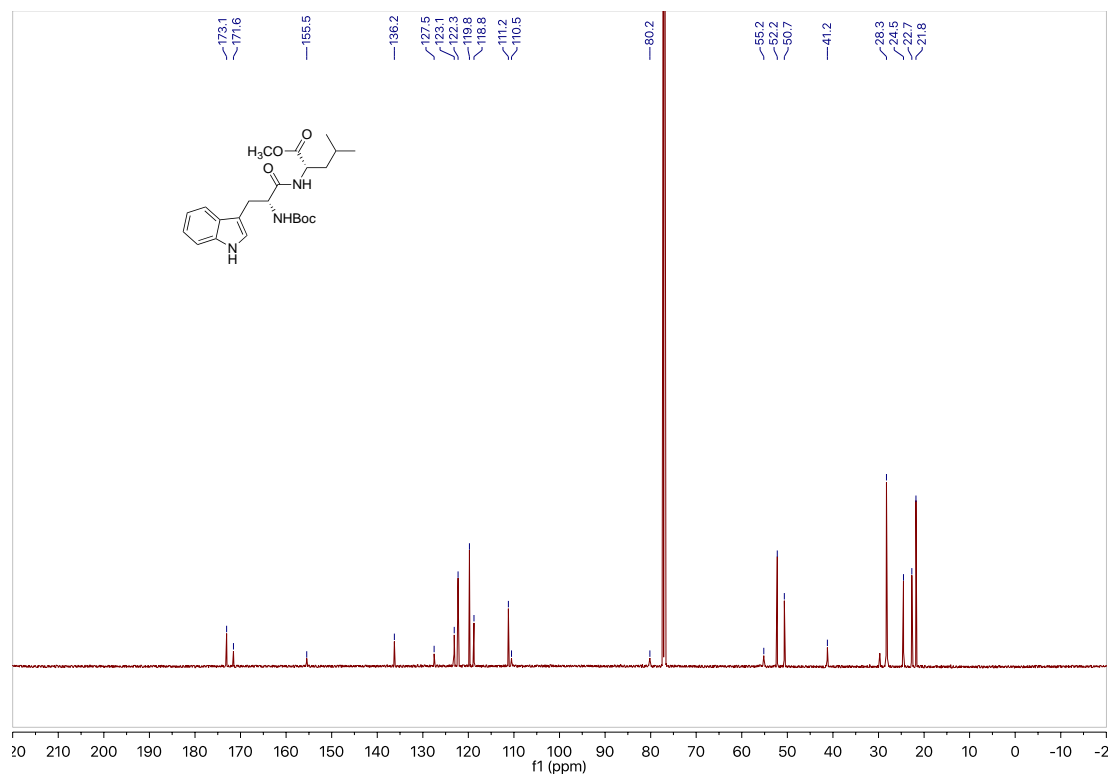

Chemical structure: CC(C)=CC(C)CCNC(=O)c1ccc2c(c1)c[nH]2

<sup>1</sup>H NMR spectrum (ppm):

- 8.41, 7.60, 7.60, 7.58, 7.58, 7.57, 7.37, 7.35, 7.35, 7.35, 7.35, 7.21, 7.21, 7.19, 7.19, 7.19, 7.19, 7.17, 7.17, 7.12, 7.12, 7.12, 7.11, 7.11, 7.10, 7.10, 7.09, 7.09, 7.09, 6.99, 6.99, 5.99, 5.95, 5.07, 5.06, 5.05, 5.05, 5.05, 5.04, 5.03, 3.62, 3.61, 3.59, 3.57, 3.57, 2.97, 2.96, 2.94, 2.94, 2.14, 2.13, 2.11, 2.10, 2.10, 1.98, 1.97, 1.96, 1.95, 1.93, 1.92, 1.91, 1.91, 1.90, 1.86, 1.84, 1.83, 1.81, 1.66, 1.65, 1.57, 1.57, 1.34, 1.33, 1.33, 1.31, 1.31, 1.30, 1.16, 1.15, 1.15, 1.13, 1.13, 0.89, 0.88

Integration values (from left to right): 1.00, 1.00, 1.03, 1.01, 1.04, 1.04, 2.21, 2.19, 1.07, 1.48, 3.31, 3.07, 1.17, 1.02, 3.48

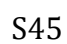

Table 1, entry 8':

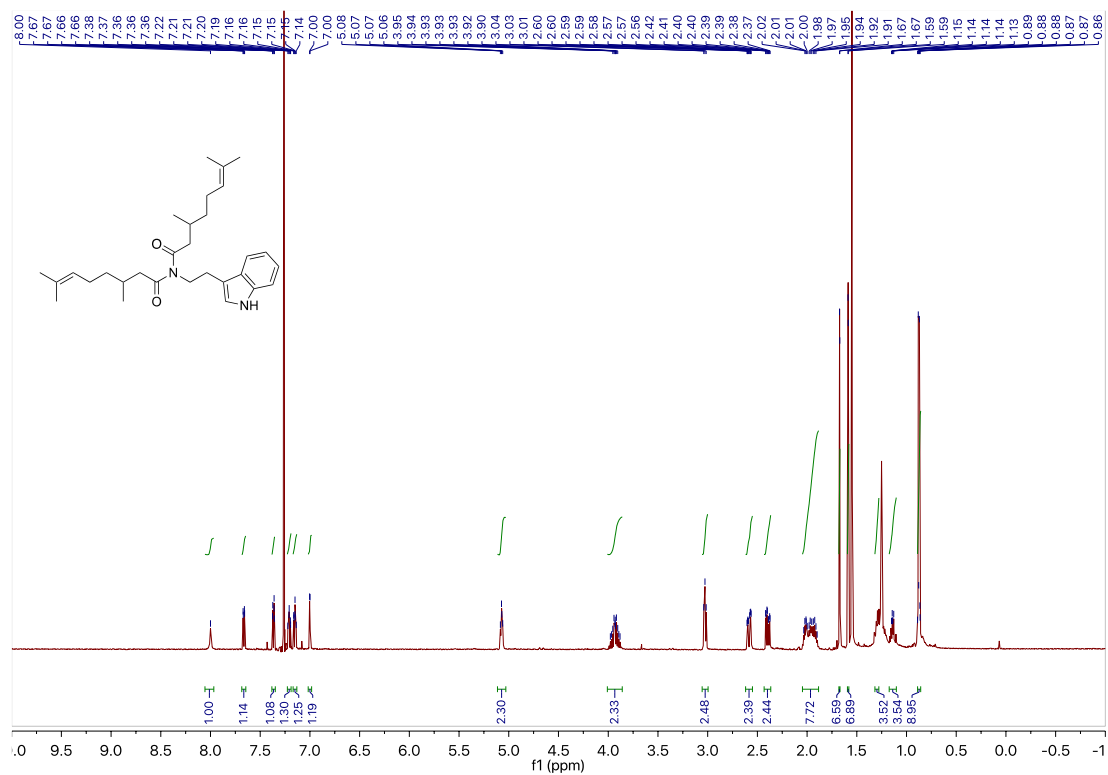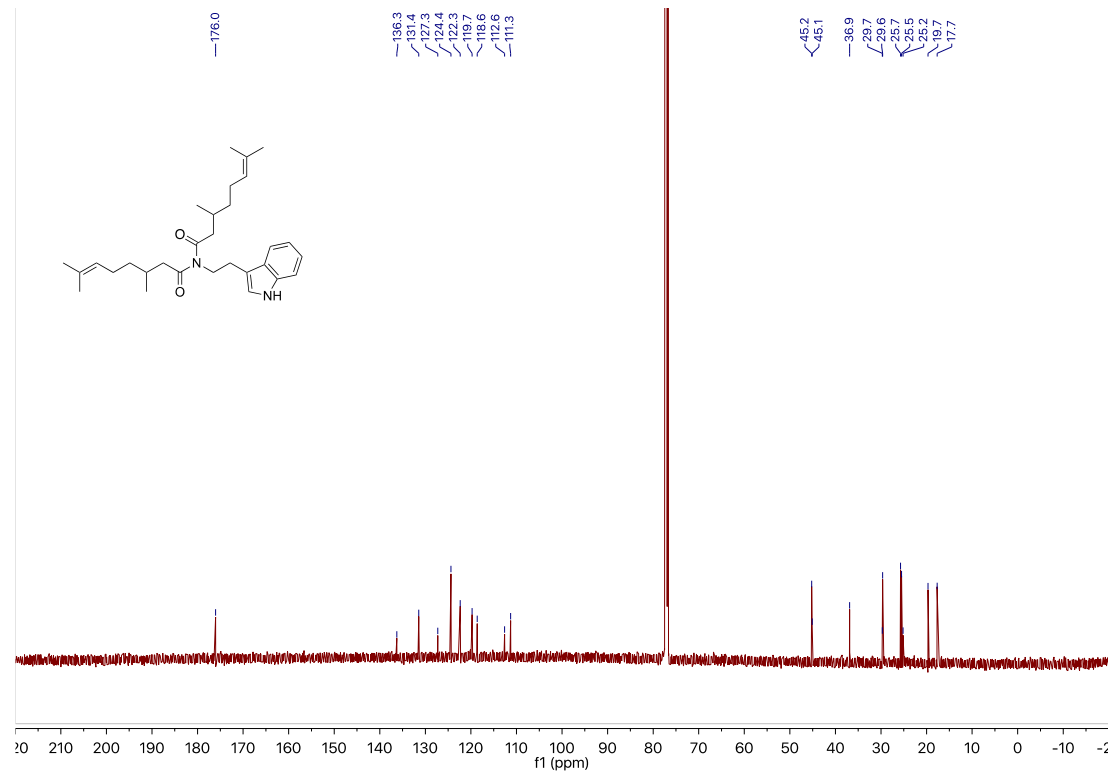

9)

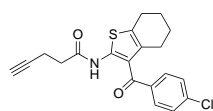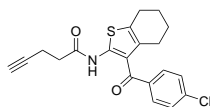

*N*-((2*S*,3*S*,4*R*)-1,3,4-Trihydroxyoctadecan-2-yl)-[1,1'-biphenyl]-4-carboxamide (Table 1, entry 10)

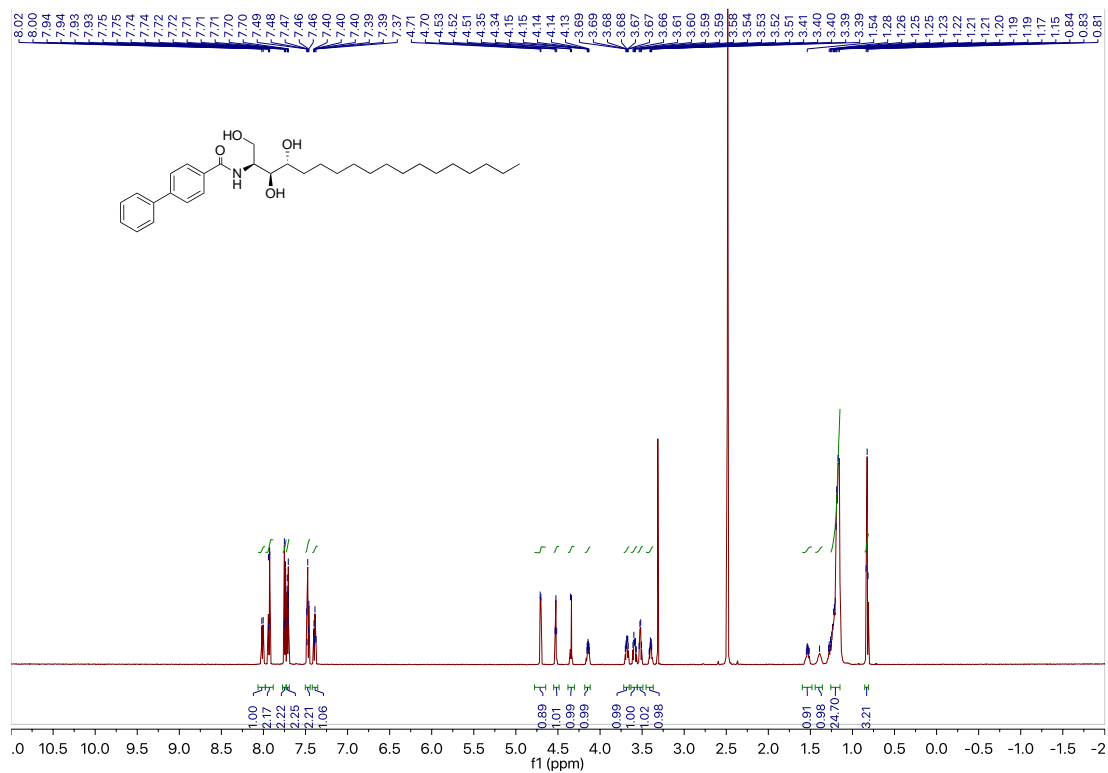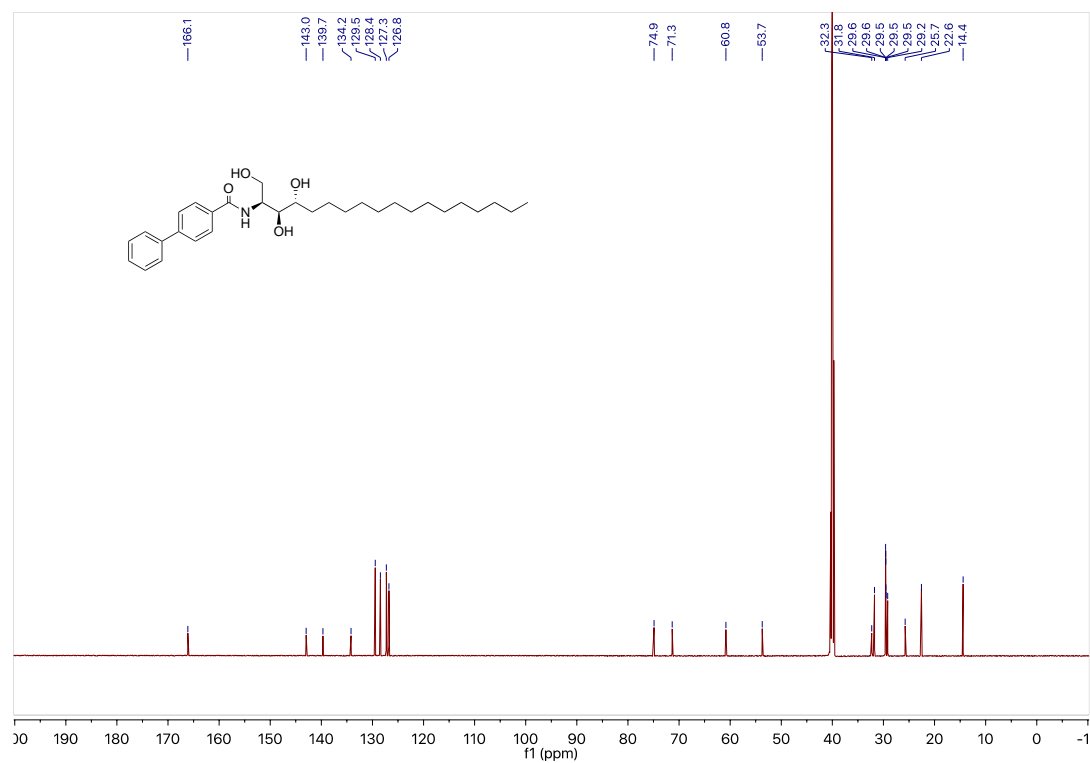



9Z,12Z)-N-((1S,2R)-2-Hydroxy-1,2-diphenylethyl)octadeca-9,12-dienamide (Table 1, entry **11**)

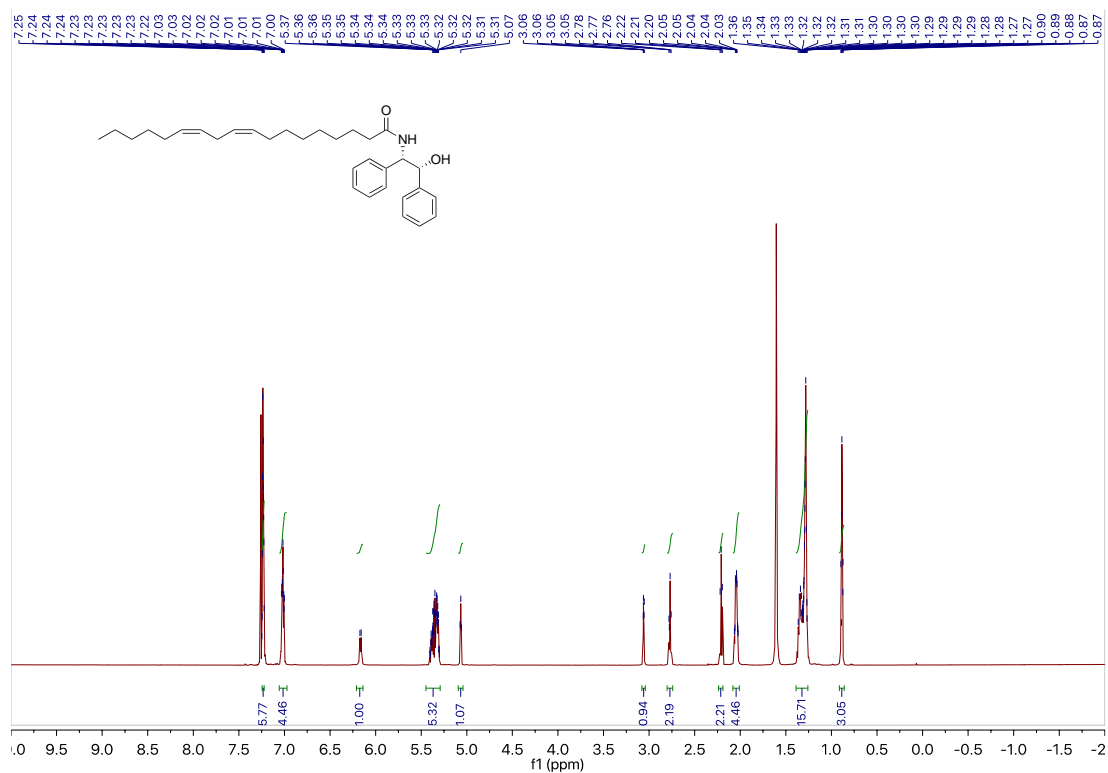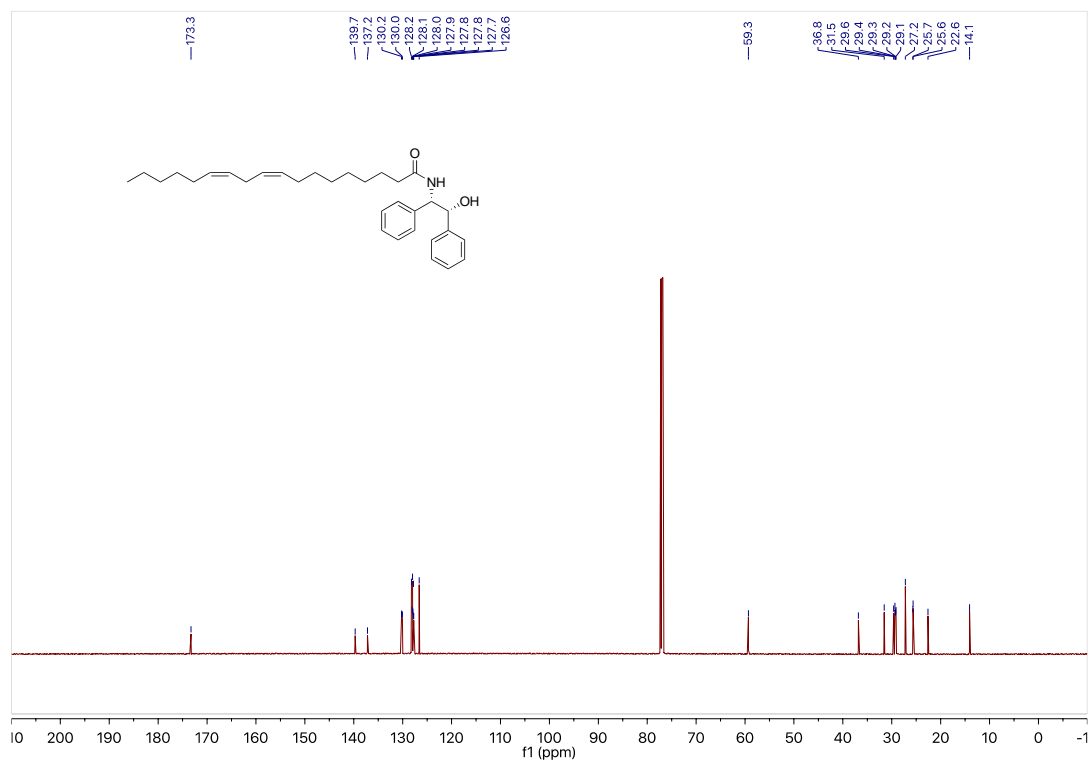

Benzyl  $N^2$ -(*tert*-butoxycarbonyl)- $N^5$ -(2-ethoxy-2-oxoethyl)- $N^5$ -methyl-*D*-glutamate (Table 1, entry **12**)

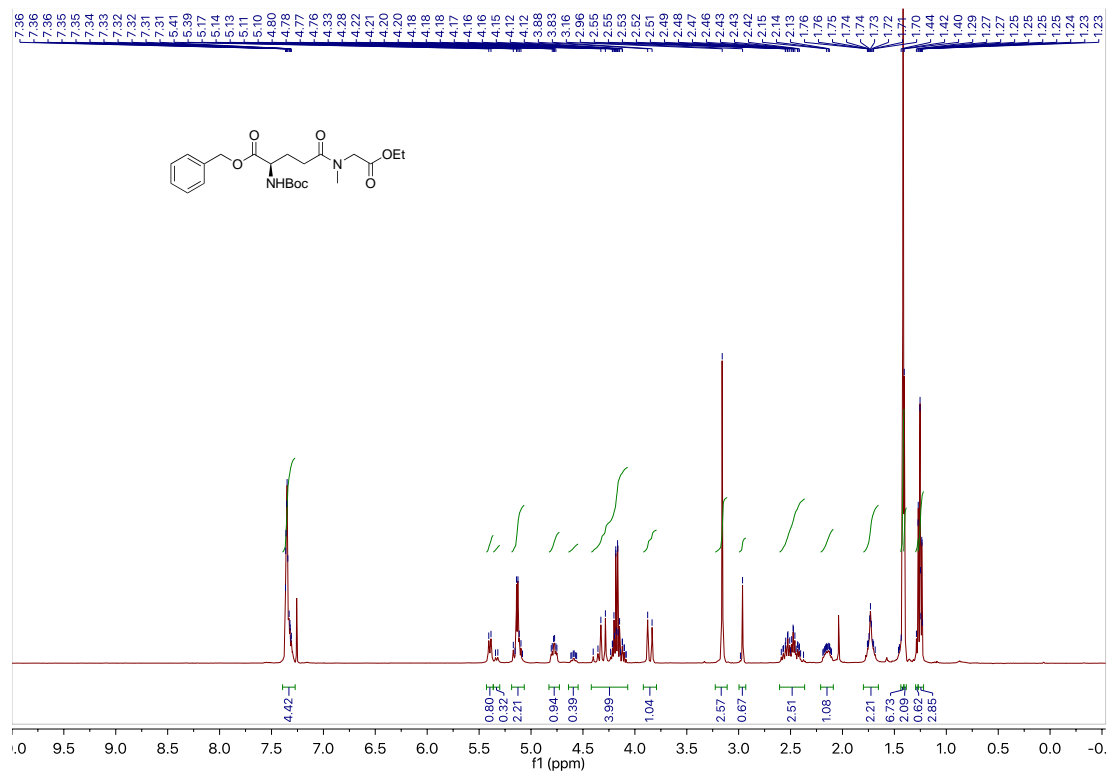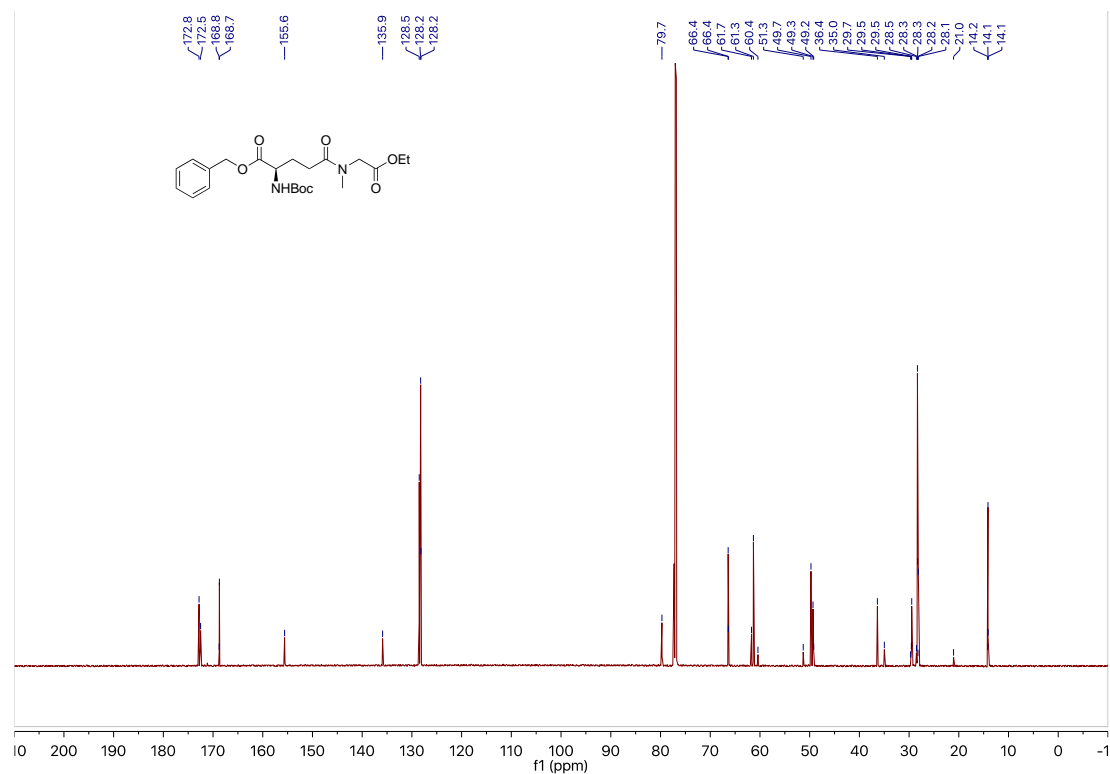

Dibenzyl (6-((4,4-diethoxybutyl)amino)-6-oxohexane-1,5-diyl)(*R*)-dicarbamate (Table 1, entry 13)

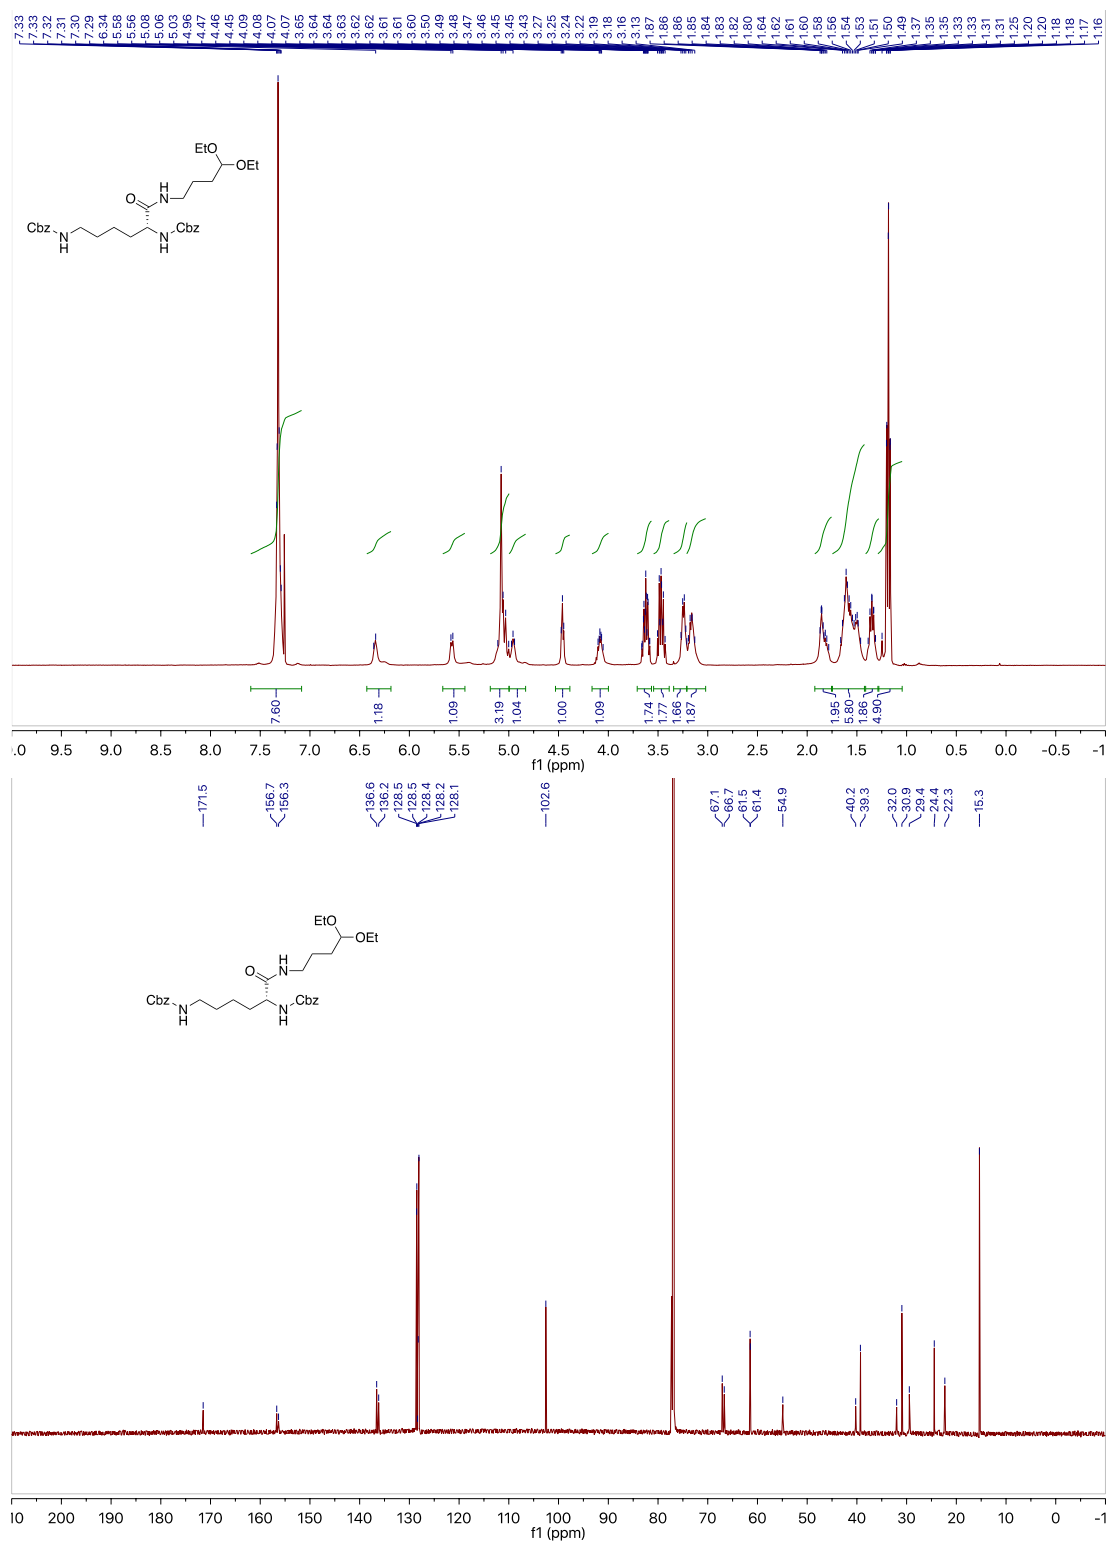

Methyl *N*-(((benzyloxy)carbonyl)-*L*-tyrosyl)-*N*-methyl-*L*-leucinate (Table 1, entry **14**)

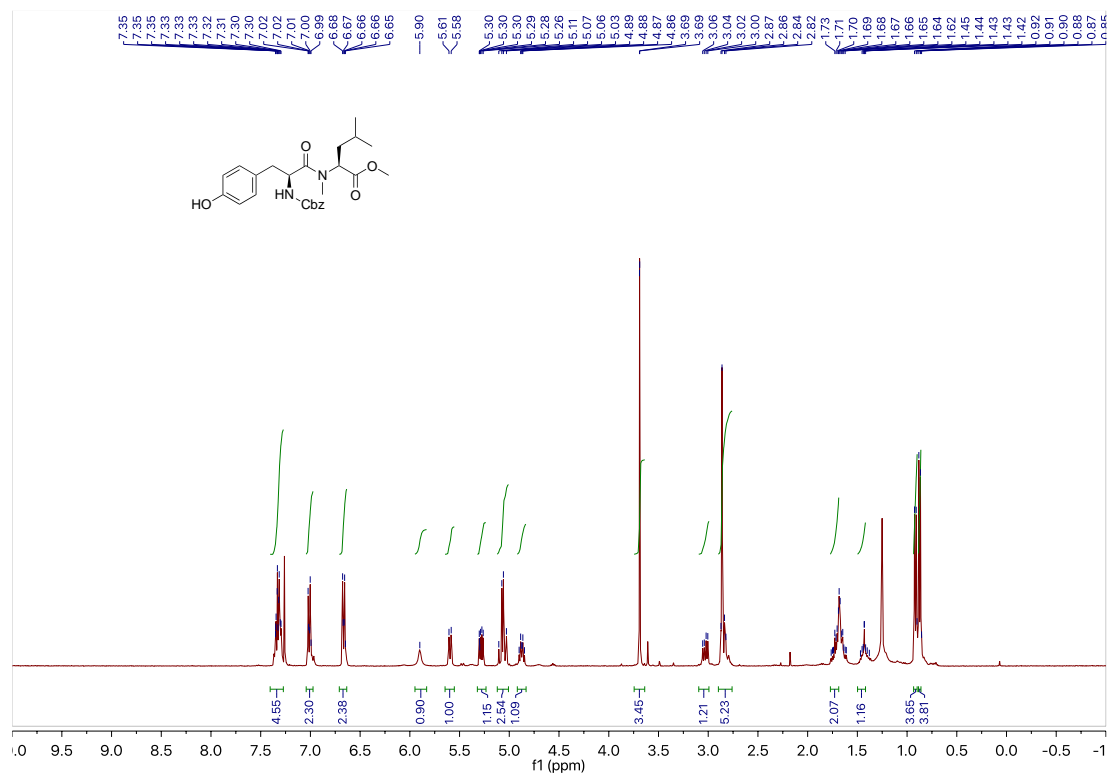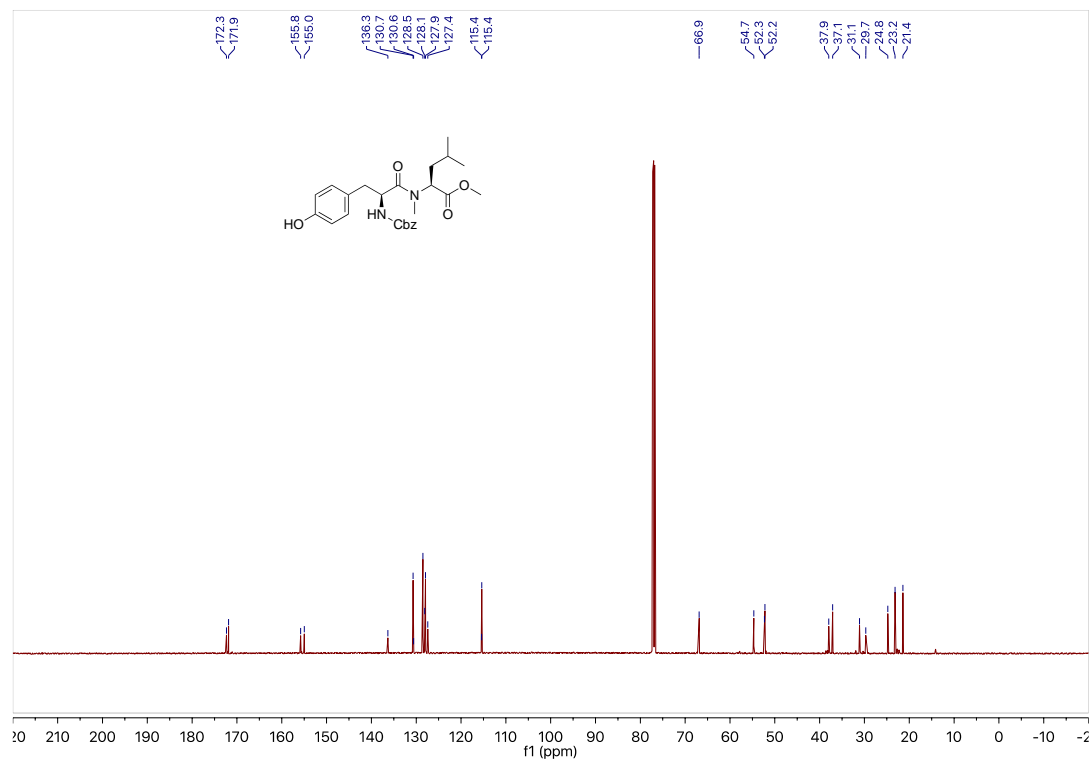

1-Ethyl-N-(4-methoxybenzyl)-7-methyl-4-oxo-1,4-dihydro-1,8-naphthyridine-3-carboxamide  
(Table 1, entry **15**)

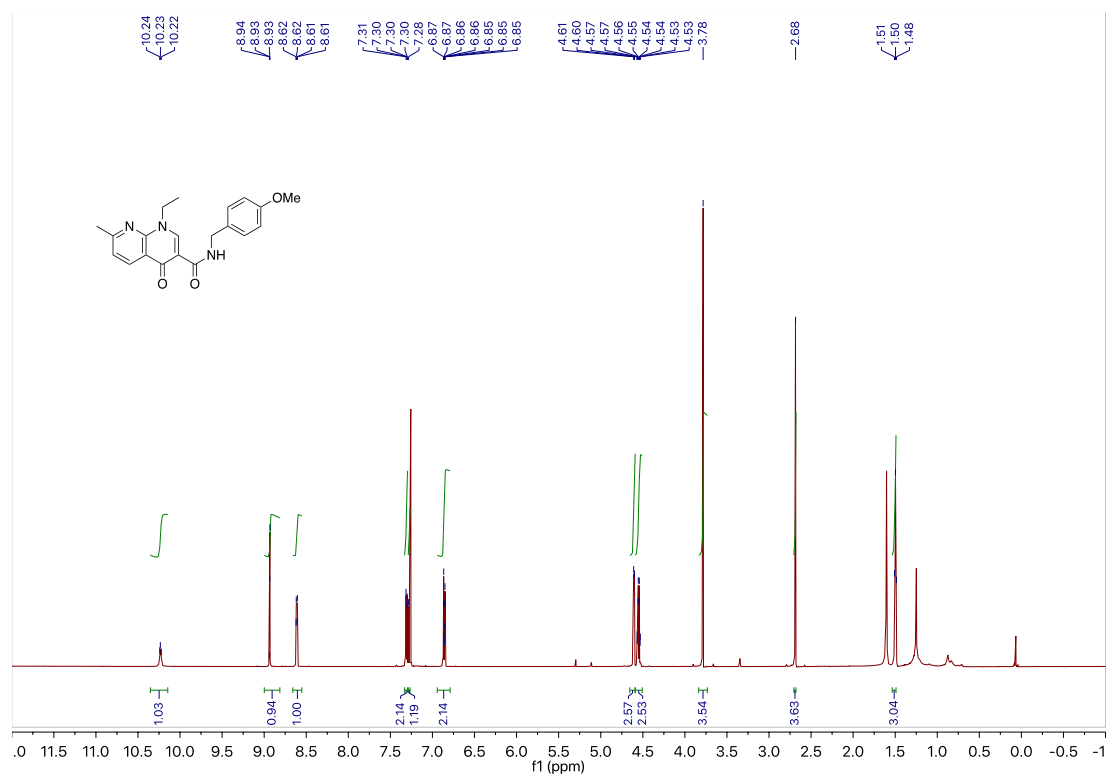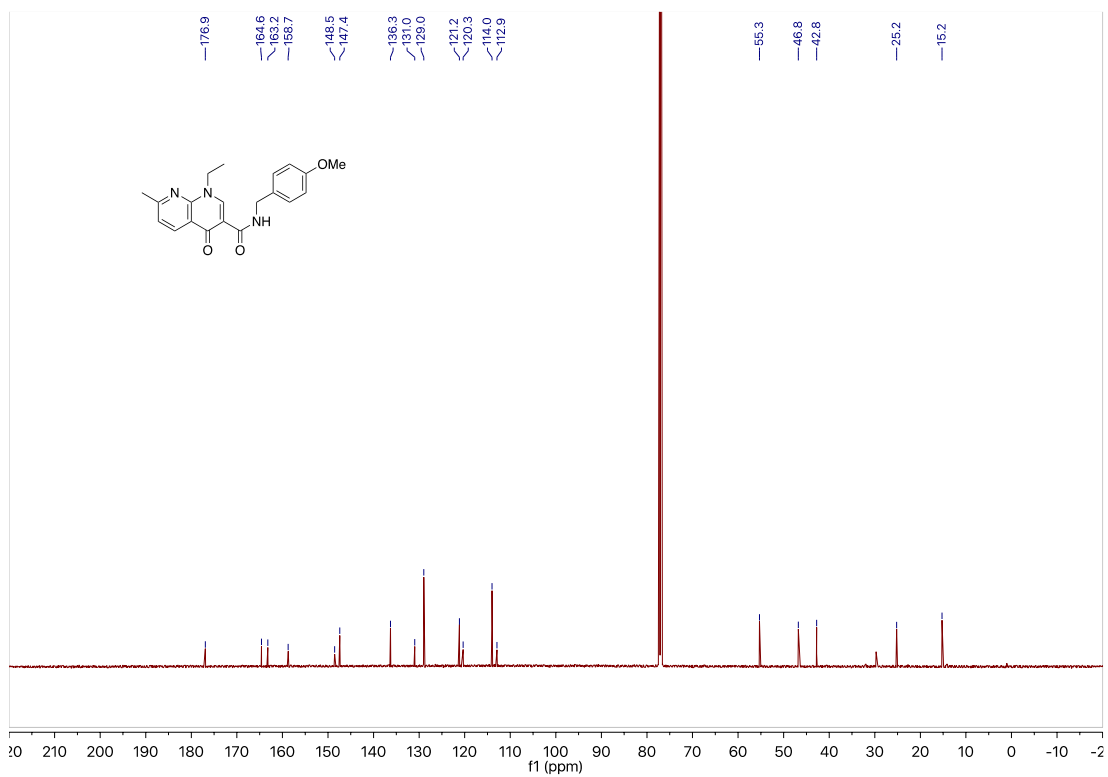

Methyl (8-((4-chlorophenyl)sulfonamido)-4-(3-(pyridin-3-yl)propyl)octanoyl)-L-valinate  
 (Table 1, entry **16**)

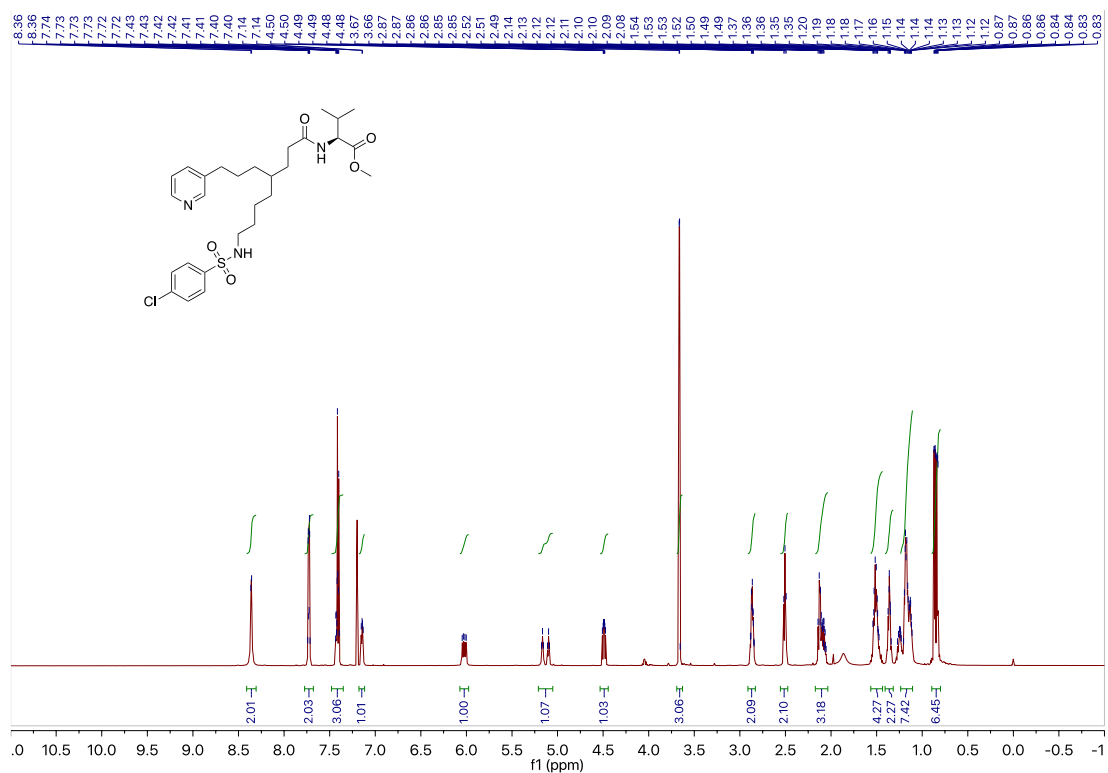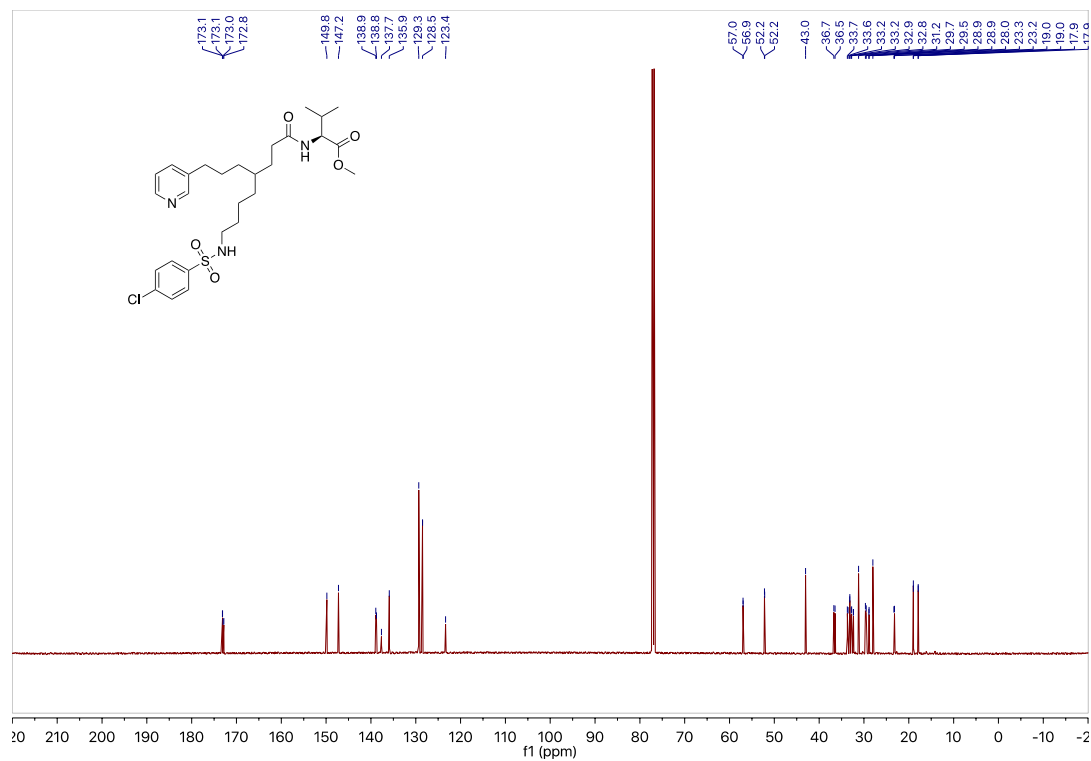

Supplement: Supplementary file 1 [file 10200219]
